# Supplementary material for: HEATR5B associates with dynein‐dynactin and promotes motility of AP1‐bound endosomal membranes
Source: PubMed Central journal article supplement (PMC10690479; doi:10.15252/embj.2023114473), 2023-10-24
Supplement: EMBJ-42-e114473-s006.pdf [file EMBJ-42-e114473-s006.pdf]

## Expanded View Figures

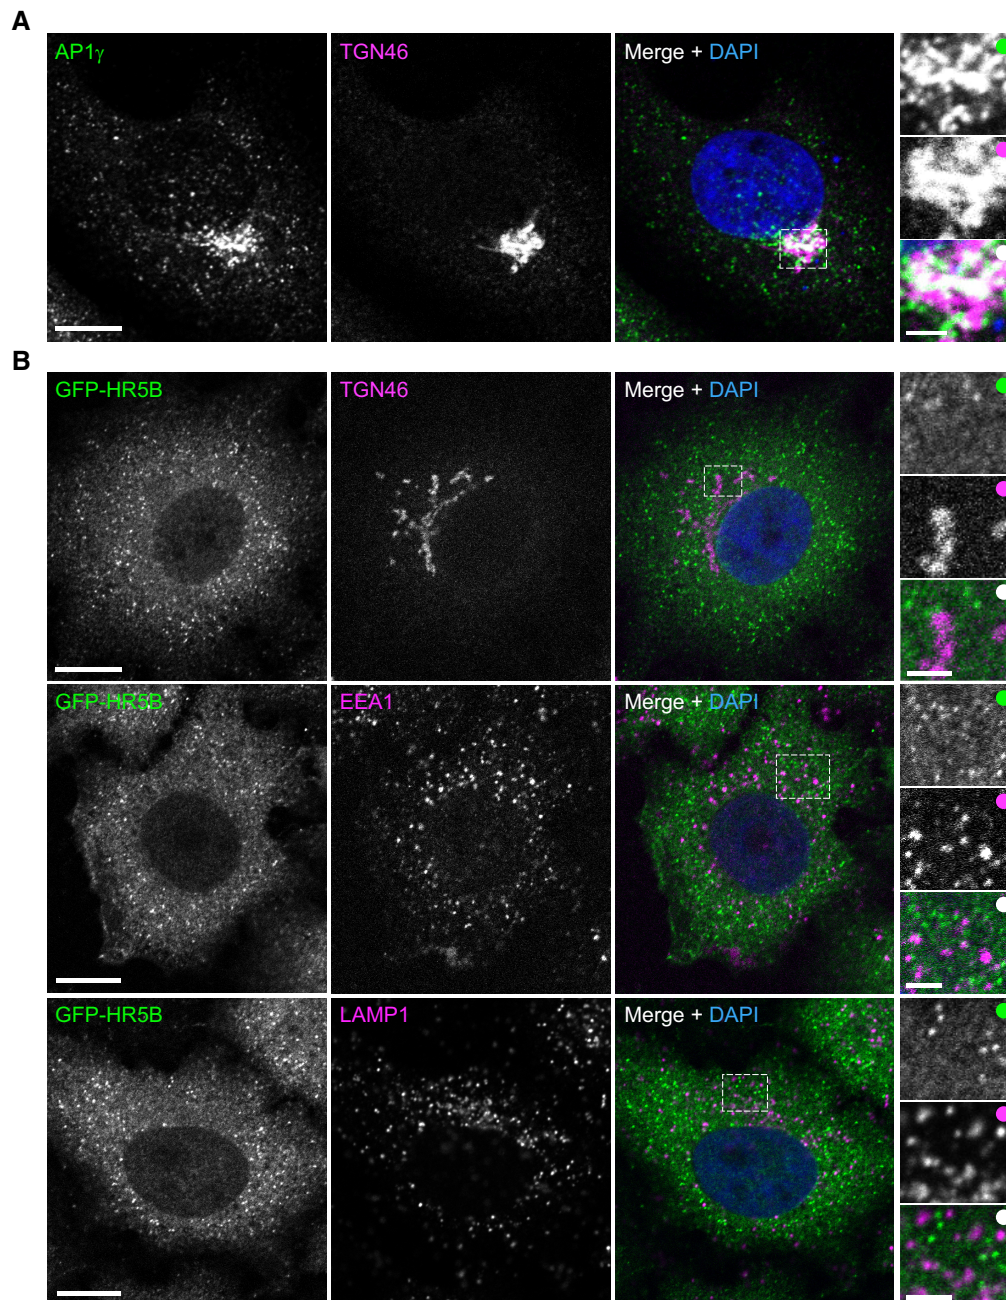

**Figure EV1. Localisation of AP1 $\gamma$  and GFP-HEATR5B with respect to other structures in fixed human cells.**

A, B Representative confocal images of wild-type (A) and stable GFP-HEATR5B (B) HeLa cells stained with antibodies to the indicated proteins (GFP signal in panel (B) was amplified with GFP antibodies). Dashed box shows area magnified in right-hand images. Panel (A) shows that AP1 $\gamma$  is clustered at the periphery of the TGN. Panel (B) shows that association of GFP-HEATR5B (HR5B) with TGN46, EEA1 and LAMP1 is rarely observed. Scale bars: main panels, 10  $\mu$ m; insets, 2.5  $\mu$ m. White circles indicate merge of magnified images.

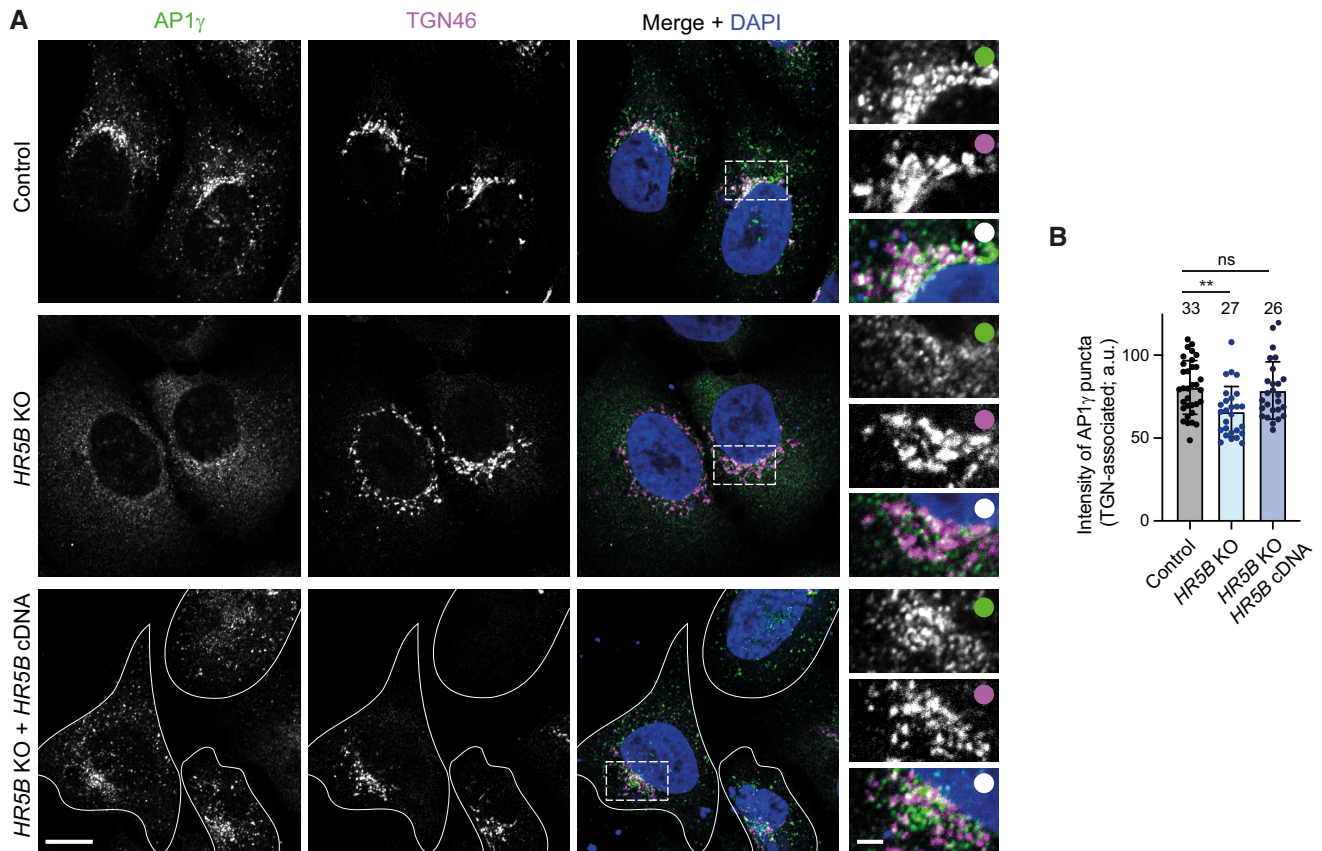

**Figure EV2. Disruption of HEATR5B partially impairs association of AP1 $\gamma$  with the TGN.**

- A Representative confocal images of control (parental) U2OS cells, *HR5B* KO U2OS cells and *HR5B* KO U2OS cells transfected with a GFP-*HR5B* expression plasmid stained with antibodies to AP1 $\gamma$  and TGN46. For illustrative purposes, the *HR5B* KO cells shown are amongst those with a strong reduction in TGN-associated AP1 $\gamma$  signal. Dashed box shows area magnified in right-hand images. White outlines show mutant cells that express GFP-*HR5B* (as assessed by imaging the GFP channel). Scale bars: (A) 10  $\mu$ m; (A) insets: 2.5  $\mu$ m. White circles indicate merge of magnified images.
- B Quantification of mean intensity of TGN-associated AP1 $\gamma$  puncta. Circles indicate values from individual cells, with columns and error bars representing mean  $\pm$  SD. Number of cells analysed is shown above columns. Statistical significance was evaluated with a one-way ANOVA test with Dunnett's multiple comparisons correction: \*\* $P < 0.01$ .



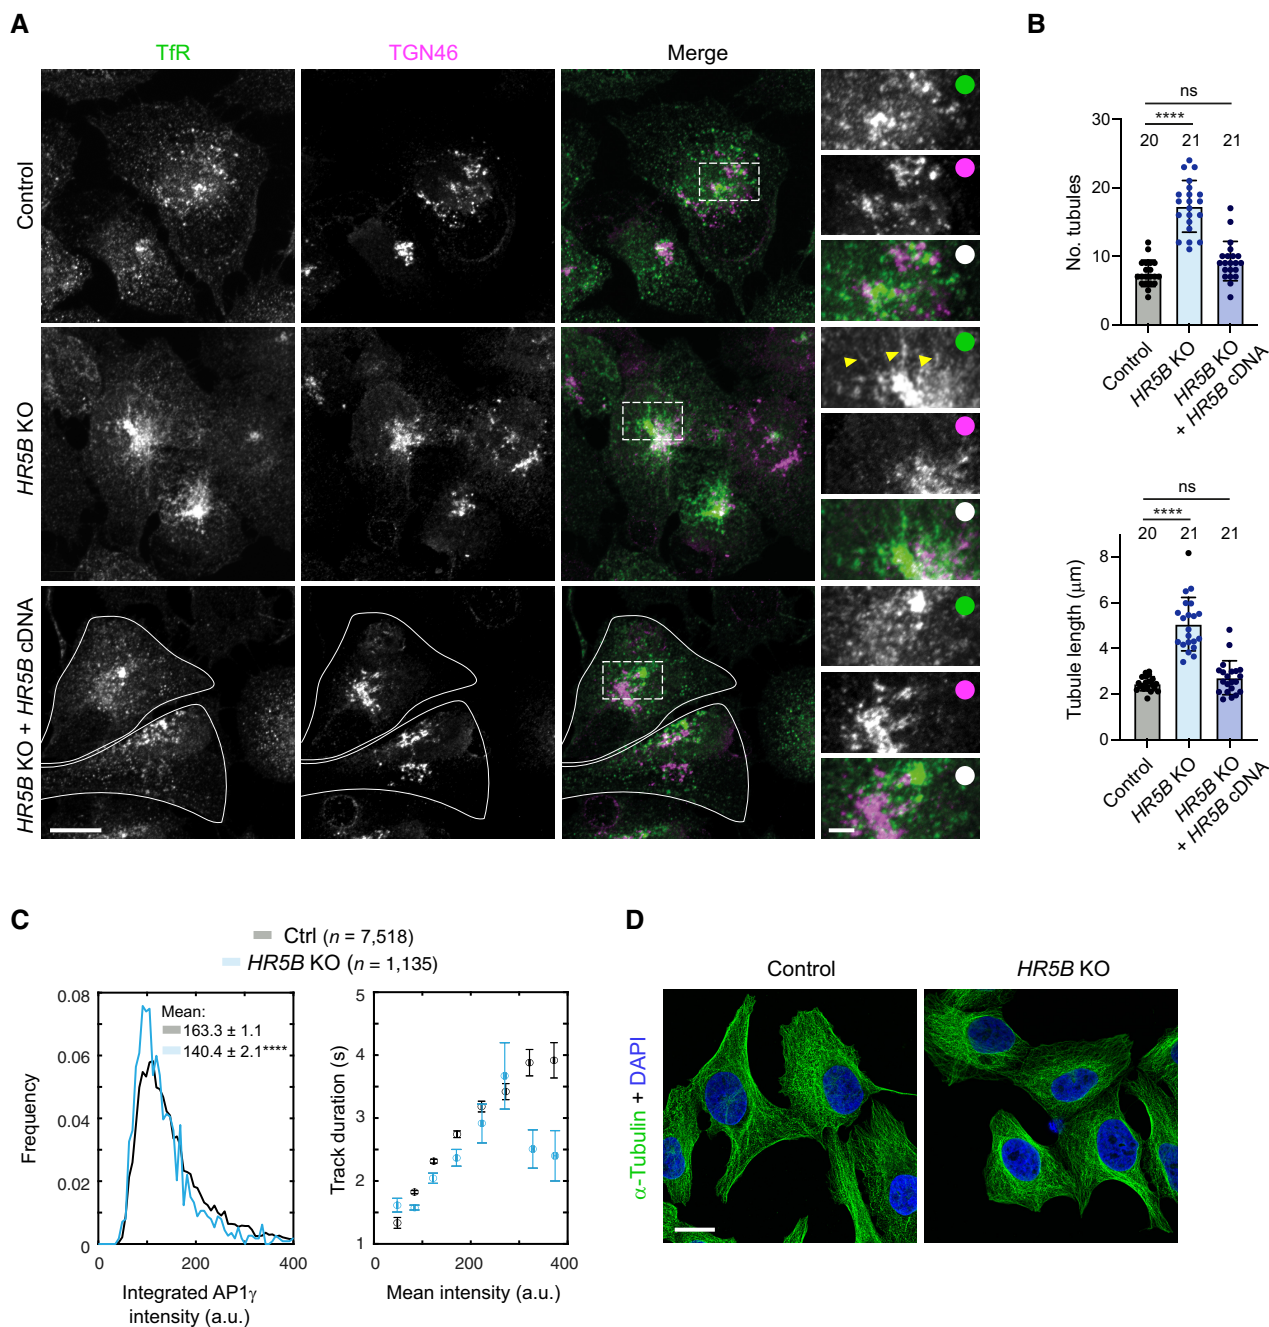

**Figure EV3. Supplementary data on HEATR5B KO phenotypes.**

- A Representative confocal images of control (parental) U2OS cells, *HR5B* KO U2OS cells and *HR5B* KO U2OS cells transfected with a GFP-*HR5B* expression plasmid stained with antibodies to Transferrin receptor (Tfr), which marks the recycling compartment in association with the TGN, and TGN46. Dashed box shows area magnified in right-hand images. Arrowheads show examples of tubulation in *HR5B* KO cells. White outlines show mutant cells that express GFP-*HR5B* (as assessed by imaging the GFP channel). White circles indicate merge of magnified images.
- B Quantification of number and length of Tfr-positive, TGN-associated tubules. Circles indicate values from individual cells, with columns and error bars representing mean  $\pm$  SD. Number of cells analysed is shown above columns. Statistical significance was evaluated with a one-way ANOVA test with Dunnett's multiple comparisons correction. \*\*\*\* $P < 0.0001$ .
- C Quantification of AP1 $\sigma$ 1-RFP particle intensity (left) and track duration versus mean particle intensity (right) in image series of control and *HR5B* KO live U2OS cells.  $n$  = number of particles (from 31 control and 17 KO U2OS cells). Errors represent SEM. In left-hand panel, a shift in the distribution of intensity values to the left in mutant cells indicates dimmer fluorescence (statistical significance was evaluated with a Mann-Whitney U test. \*\*\*\* $P < 0.0001$ ).
- D Representative confocal images of control (parental) and *HR5B* KO U2OS cells stained with  $\alpha$ -tubulin antibodies, showing no overt difference in the architecture of the microtubule cytoskeleton.

Data information: Scale bars: (A) 15  $\mu\text{m}$ ; (A) insets, 3  $\mu\text{m}$ ; (D) 20  $\mu\text{m}$ .

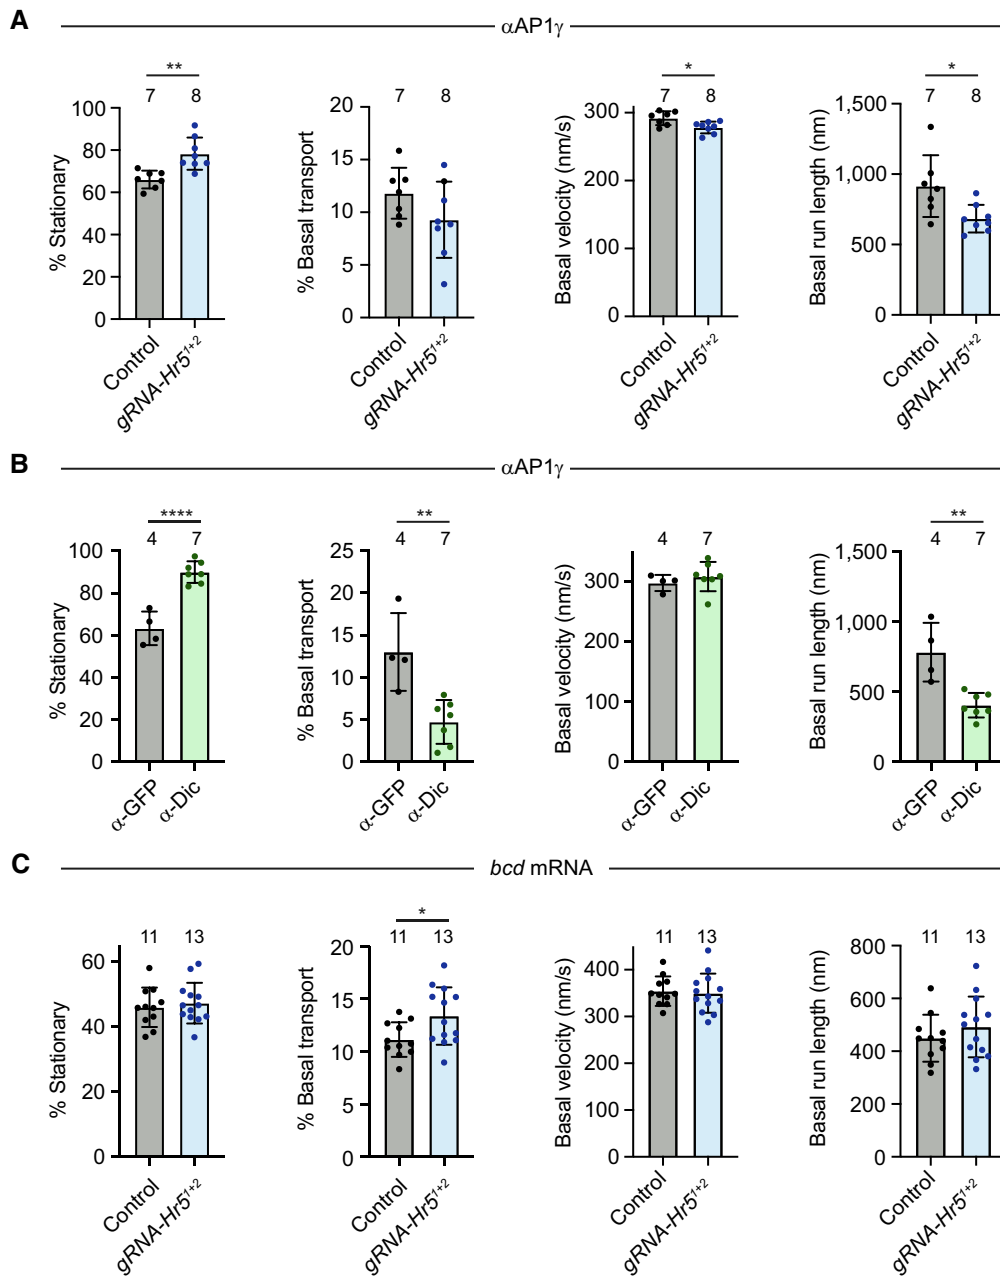

**Figure EV4. Quantification of frequency of stationary events and basal transport in AP1 $\gamma$  and *bcd* mRNA motility assays.**

A–C Quantification of the indicated parameters for AP1 $\gamma$  (A, B) and *bcd* mRNA (C) in embryos of control (*nos-cas9*) and *nos-cas9*, *gRNA-Hr5<sup>+/2</sup>* mothers (A, C) or wild-type embryos pre-injected with function-blocking Dic antibodies or control GFP antibodies (B). “% stationary” and “% basal” are the percentages of particle trajectory time that are classed as immobile or undergoing basal transport, respectively. Circles are mean values for individual embryos; columns and error bars represent means  $\pm$  SD of these mean values; numbers of embryos injected is shown above columns. At least 24 particles were analysed per embryo. Statistical significance was evaluated with an unpaired two-tailed *t*-test: \*\*\*\**P* < 0.0001; \*\**P* < 0.01; \**P* < 0.05.



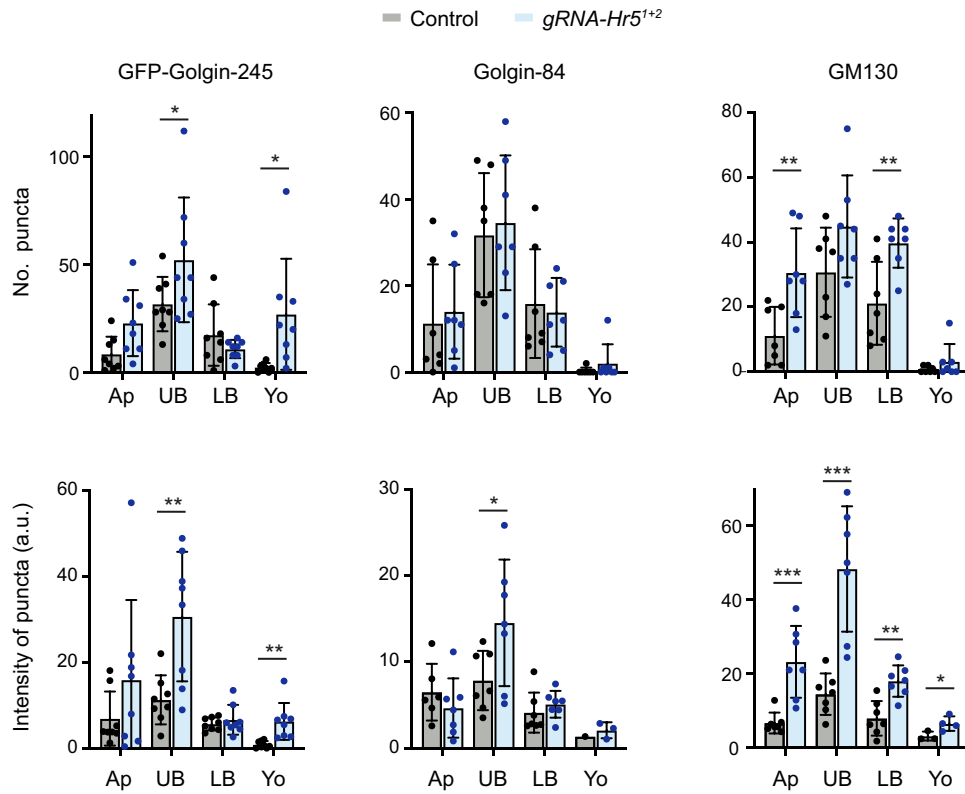

**Figure EV5. Quantification of Golgi protein localisation in control and *Heatr5* mutant blastoderm embryos.**

Charts show values for number of puncta and intensity of puncta for the indicated golgin proteins in different regions of the cytoplasm of embryos from control (*nos-cas9*) and *nos-cas9, gRNA-Hr5<sup>+</sup>2* mothers (Ap, apical to the nuclei; UB, upper basal region; LB, lower basal region; Yo, yolk). Columns and error bars show mean of values per embryo  $\pm$  SD; circles show mean values for individual embryos. At least 50 puncta were analysed per embryo. Statistical significance was evaluated with an unpaired two-tailed t-test: \*\*\* $P < 0.001$ ; \*\* $P < 0.01$ ; \* $P < 0.05$ . Consistent phenotypes were observed in two biological replicates; quantification is from a single biological replicate.
