# Supplementary material for: HEATR5B associates with dynein‐dynactin and promotes motility of AP1‐bound endosomal membranes
Source: PubMed Central journal article supplement (PMC10690479; doi:10.15252/embj.2023114473), 2023-10-24
Supplement: EMBJ-42-e114473-s011.pdf [file EMBJ-42-e114473-s011.pdf]

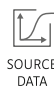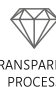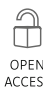

# HEATR5B associates with dynein-dynactin and promotes motility of AP1-bound endosomal membranes

Vanesa Madan<sup>1,‡</sup>, Lucas Albacete-Albacete<sup>1,†</sup> , Li Jin<sup>1,†</sup>, Pietro Scaturro<sup>2</sup>, Joseph L Watson<sup>1,§</sup>, Nadine Muschalik<sup>1</sup>, Farida Begum<sup>1</sup> , Jérôme Boulanger<sup>1</sup>, Karl Bauer<sup>3</sup>, Michael A Kiebler<sup>3</sup> , Emmanuel Derivery<sup>1</sup> & Simon L Bullock<sup>1,\*</sup>

## Abstract

The microtubule motor dynein mediates polarised trafficking of a wide variety of organelles, vesicles and macromolecules. These functions are dependent on the dynactin complex, which helps recruit cargoes to dynein's tail and activates motor movement. How the dynein-dynactin complex orchestrates trafficking of diverse cargoes is unclear. Here, we identify HEATR5B, an interactor of the adaptor protein-1 (AP1) clathrin adaptor complex, as a novel player in dynein-dynactin function. HEATR5B was recovered in a biochemical screen for proteins whose association with the dynein tail is augmented by dynactin. We show that HEATR5B binds directly to the dynein tail and dynactin and stimulates motility of AP1-associated endosomal membranes in human cells. We also demonstrate that the *Drosophila* HEATR5B homologue is an essential gene that selectively promotes dynein-based transport of AP1-bound membranes to the Golgi apparatus. As HEATR5B lacks the coiled-coil architecture typical of dynein adaptors, our data point to a non-canonical process orchestrating motor function on a specific cargo. We additionally show that HEATR5B promotes association of AP1 with endosomal membranes independently of dynein. Thus, HEATR5B co-ordinates multiple events in AP1-based trafficking.

**Keywords** dynein-dynactin; endosome; HEATR5B; membrane trafficking; microtubule

**Subject Categories** Cell Adhesion, Polarity & Cytoskeleton; Membranes & Trafficking

**DOI** 10.15252/emboj.2023114473 | Received 9 May 2023 | Revised 20 September 2023 | Accepted 26 September 2023 | Published online 24 October 2023

**The EMBO Journal (2023) 42: e114473**

## Introduction

Microtubule motors play a central role in the trafficking of cellular constituents through the cytoplasm. Whilst multiple kinesin family members are tasked with transporting cargoes towards microtubule plus ends, a single motor—cytoplasmic dynein-1 (dynein)—is responsible for almost all minus end-directed movement (Reck-Peterson *et al*, 2018). Dynein's diverse cellular cargoes include mRNAs, protein complexes, nuclei, mitochondria, lysosomes, the Golgi apparatus and multiple classes of vesicle. It is unclear how one motor orchestrates trafficking of so many cargoes.

Dynein is a highly conserved, 1.3-MDa complex of six subunits, which are each present in two copies (Schmidt & Carter, 2016; Reck-Peterson *et al*, 2018). The heavy chain subunit contains a motor domain and a tail domain (Fig 1A). The motor domain has force-generating ATPase activity and a microtubule-binding site, which work in concert to drive movement along the track. The tail domain mediates homodimerisation and recruits the other dynein subunits, which make important contributions to complex stability and cargo binding (Schroeder *et al*, 2014; Lee *et al*, 2018; Reck-Peterson *et al*, 2018).

*In vitro* studies have shown that mammalian dynein needs additional factors for processive movement on microtubules (Miura *et al*, 2010; Trokter *et al*, 2012; McKenney *et al*, 2014; Schlager *et al*, 2014). The paradigmatic activation mechanism uses a combination of the 1.1-MDa dynactin complex and one of a number of coiled coil-containing proteins—so-called “activating adaptors” (Reck-Peterson *et al*, 2018; Olenick & Holzbaur, 2019)—that interact with cargo-associated proteins. The activating adaptor stimulates the interaction of dynein's tail with dynactin, which re-positions the motor domains for processive movement (Splinter *et al*, 2012;

1 Division of Cell Biology, Medical Research Council (MRC) Laboratory of Molecular Biology, Cambridge, UK

2 Leibniz Institute of Virology, Hamburg, Germany

3 Biomedical Center, Department for Cell Biology, Medical Faculty, Ludwig-Maximilians-University of Munich, Munich, Germany

\*Corresponding author. Tel: +0044 1223 267040; E-mail: sbullock@mrc-lmb.cam.ac.uk

†These authors contributed equally to this work

‡Present address: Abcam, Cambridge, UK

§Present address: Department of Biochemistry, University of Washington, Seattle, WA, USA

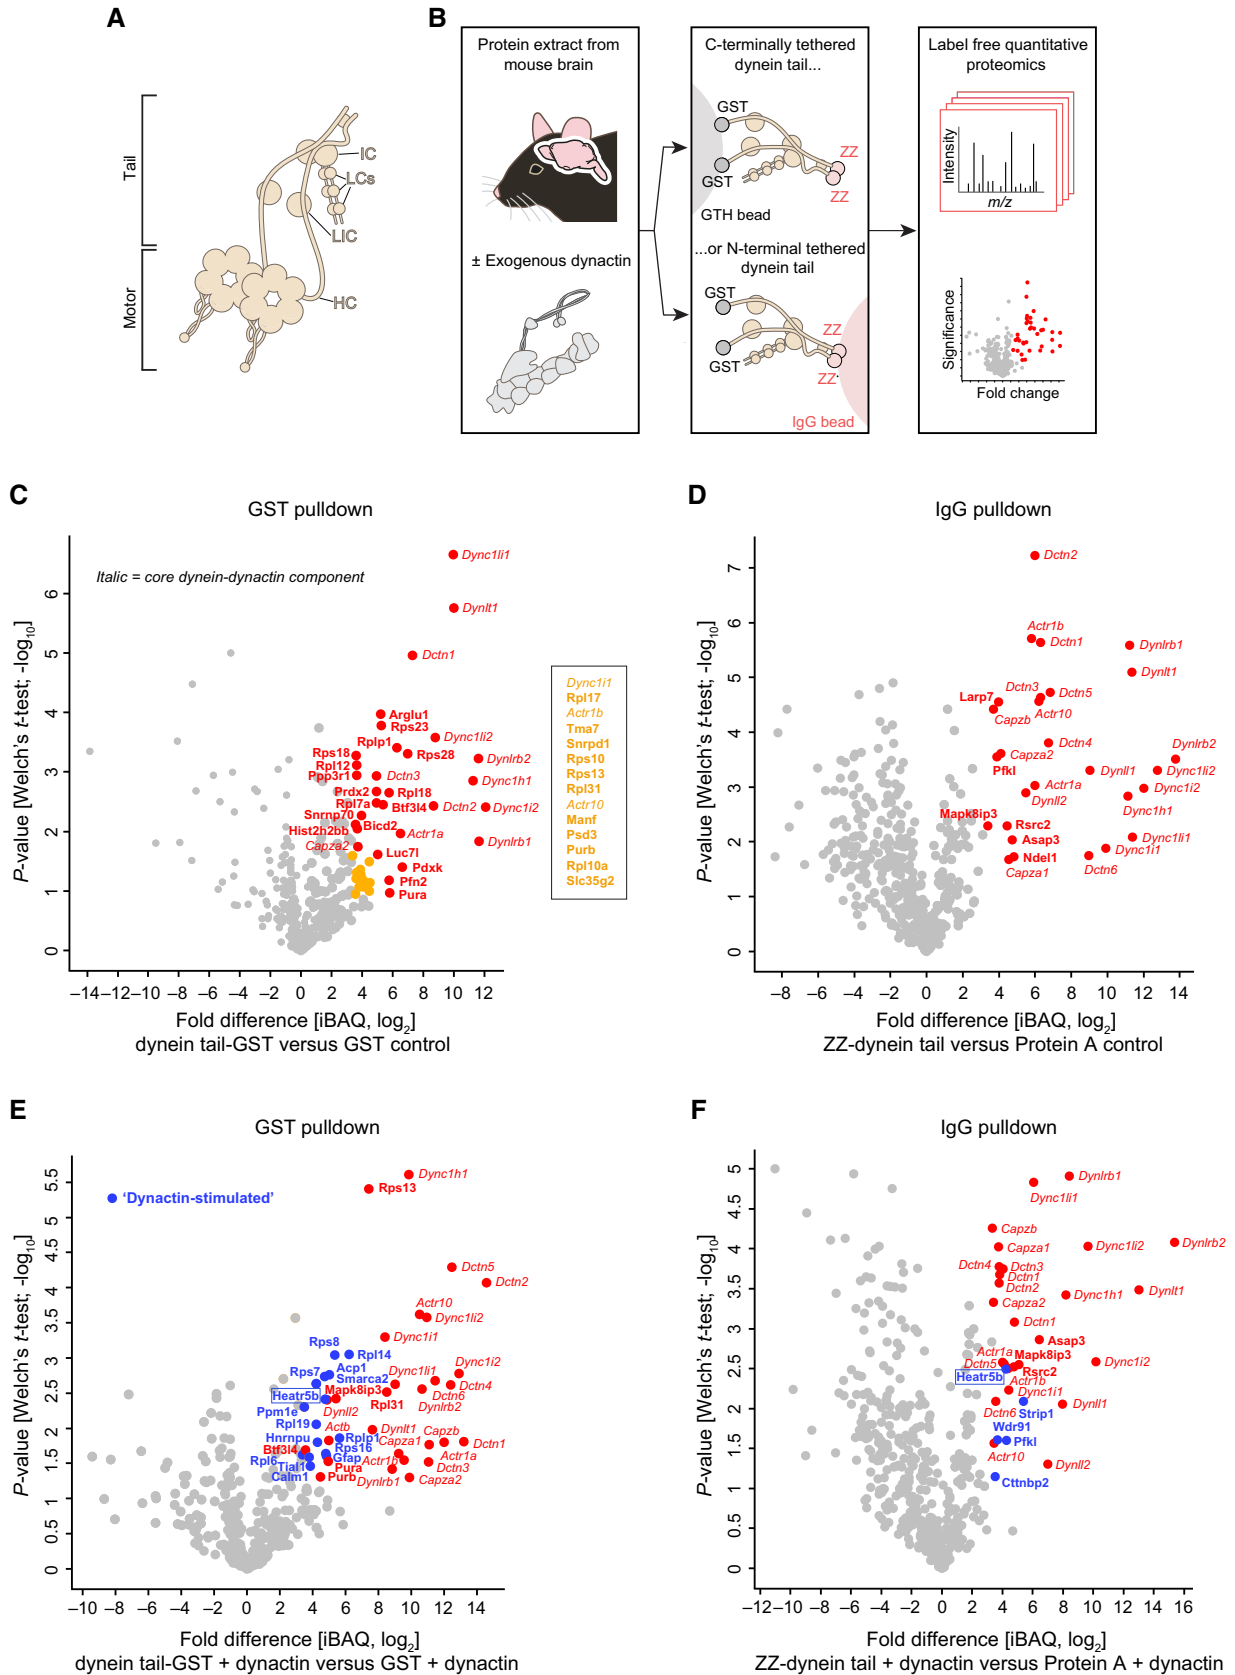

Figure 1.

**Figure 1. Dynein architecture and identification of novel dynein tail interactors.**

- A Overview of dynein complex. IC, intermediate chain; LCs, light chains; LIC, light intermediate chain; IC, intermediate chain.
- B Biochemical strategy for identifying dynein tail interactors, including those whose association is stimulated by dynactin. ZZ is a protein A-based tag.
- C–F Volcano plots showing results of label-free quantitative proteomics (iBAQ, intensity based absolute quantification; from three technical replicates per condition). Proteins that met our criteria for enrichment on the dynein tail versus the control (median  $\log_2$ [fold change] > 3.322 and Welch's *t*-test *q*-value < 0.05) are labelled in colour and named. For clarity, the names of significant hits that cluster closely together on the plot (yellow circles) are given separately. Core dynein-dynactin components that were enriched on the dynein tail are shown in italics, with other enriched proteins shown in bold; of these “none core” proteins, those only detected in the presence of exogenous dynactin are shown in bold and blue.

McKenney *et al*, 2014; Schlager *et al*, 2014; Zhang *et al*, 2017). Dynactin is also important for cargo recruitment to dynein as it stabilises the association of the motor with activating adaptors (Splinter *et al*, 2012; McKenney *et al*, 2014; Schlager *et al*, 2014).

The activating adaptors and cargo-associated proteins that connect different cargoes to dynein's tail and dynactin have been defined in only a small number of cases (Hoogenraad & Akhmanova, 2016; Reck-Peterson *et al*, 2018; Olenick & Holzbaaur, 2019). Thus, for many cargoes, the proteins that provide the bridge to the motor complex and activate motor movement are not known. Identifying such factors is a prerequisite for understanding principles of cargo recognition and motor activation, as well as for dissecting the cellular functions of specific dynein-based transport processes.

We set out to address this issue by identifying novel biochemical interactors of the dynein tail, including those whose binding is enhanced by dynactin. Functional analysis of one dynactin-stimulated interactor, the non-coiled-coil protein HEATR5B, shows that it binds directly to the dynein tail and dynactin and has an evolutionarily conserved function in promoting motility of adaptor protein-1 (AP1)-associated endosomal membranes. This work reveals a critical contribution of a protein that lacks coiled-coil architecture to dynein-based transport and provides novel insights into dynein functions during membrane trafficking. We also show that HEATR5B promotes association of AP1 with endosomal membranes independently of dynein. Thus, we have identified a factor that co-ordinates the recruitment of AP1 to endosomal membranes with microtubule-based transport of these structures.

## Results

### A biochemical screen for dynein tail interactors

It was recently found that autoinhibitory interactions involving the dynein motor domain reduce association of the dynein tail with dynactin and cargo adaptors (Zhang *et al*, 2017; Htet *et al*, 2020). We therefore sought to increase the likelihood of identifying novel tail interactors by performing affinity purifications with a recombinant human dynein complex that lacks the motor domains (Fig 1B). This “tail complex” (comprising residues 1–1,079 of the DYNC1H1 heavy chain, the DYNC1I2 intermediate chain, the DYNC1LI2 light intermediate chain and the DYNLL1, DYNRB1 and DYNLT1 light chains) was produced in insect cells (Appendix Fig S1) and coupled to beads via epitope tags. The beads were then incubated with extracts from mouse brain, which provides a concentrated source of potential binding partners. Pull-downs were performed with both N-terminally and C-terminally tethered tail complexes to prevent loss of any interactions obstructed by coupling to beads in a

specific orientation. In a subset of pull-downs, brain extracts were spiked with purified dynactin (Appendix Fig S1), which we reasoned would facilitate capture of tail interactors involved in cargo transport processes. Following mild washing of beads, retained proteins from three technical replicates per condition were analysed with label-free quantitative proteomics (Datasets EV1–EV4).

In the absence of exogenous dynactin, 57 proteins met our criteria for enrichment in the dynein tail pull-downs compared to controls in which only the epitope tags were coupled to the beads ( $\log_2$ [fold change] > 3.322, i.e. fold change > 10, and Welch's *t*-test *q*-value < 0.05; Fig 1C and D). Twenty-two of these proteins were core components of dynein or dynactin (Fig 1C and D – italics). These factors included isoforms of dynein subunits that were not present in the recombinant human tail complex (Dync1i1, Dync1li1, Dynll2 and Dynlr2), which were presumably recovered either because they exchange with their counterparts in the recombinant tail complex or are part of a second dynein complex that can be bridged by dynactin (Grotjahn *et al*, 2018; Urnavicius *et al*, 2018). The other 35 proteins specifically captured by the tail (Fig 1C and D – bold; Appendix Table S1) included two known coiled-coil containing cargo adaptors for dynein-dynactin—BicD2 and Mapk8ip3 (also known as Jip3)—and the dynein regulator Ndel1 (Reck-Peterson *et al*, 2018). The other tail-enriched factors had not previously been shown to interact with dynein or dynactin. These proteins included ribosomal subunits, RNA binding proteins and other proteins with diverse biochemical functions (Appendix Table S1).

We next determined which proteins were captured on the dynein tail versus the epitope tag controls when exogenous dynactin was spiked into the extracts. In addition to dynein and dynactin components (Fig 1E and F – italics), 28 proteins were enriched on the tail with dynactin spiking (Fig 1E and F – bold). Seventeen of these proteins were not captured by the tail in the absence of exogenous dynactin (Fig 1E and F – bold and blue; Appendix Table S2). These “dynactin-stimulated” interactors included Strip1 (Striatin-interacting protein 1), a component of the Stripak (Striatin-interacting phosphatases and kinases) complex, and the Stripak-associated factor Ctnb2 (Cortactin binding protein 2) (Kuck *et al*, 2019). *Drosophila* Stripak components associate with dynein and dynactin and regulate transport of endosomes, autophagosomes and dense-core vesicles (Sakuma *et al*, 2014; Neisch *et al*, 2017). Our data strengthen evidence that interactions of STRIPAK proteins with dynein-dynactin are conserved in mammals (Goudreault *et al*, 2009). The other dynactin-stimulated proteins had not been linked with dynein or dynactin in previous studies.

Collectively, our pull-down experiments identified ~50 novel interacting proteins of the dynein tail, several of which had their association enhanced by dynactin.

## HEATR5B associates with the dynein tail and dynactin

From our list of candidate tail interactors, we were particularly drawn to Heatr5B (Heat repeat containing protein 5B; also known as p200a; Hirst *et al*, 2005) because this protein was the only factor whose recruitment to both the N-terminally and C-terminally tethered dynein tail complexes was stimulated by exogenous dynactin (boxed labels in Fig 1E and F). Moreover, a previous proteomic study found that Heatr5B is present on dynactin-associated membranes isolated from mouse brain (Hinckelmann *et al*, 2016).

Heatr5B (HEATR5B in humans) is a 225 kDa protein that lacks a coiled-coil domain and is predicted to mostly comprise HEAT repeats (Yoshimura & Hirano, 2016; <https://www.uniprot.org/uniprot/Q9P2D3>). Humans also have a related protein, HEATR5A (p200b), which was not recovered in our screen for tail interactors. A complex of HEATR5B, Aftiphilin (AFTPH/AFTIN) and  $\gamma$ -synergin (SYNRG/AP1GBP1) interacts with the AP1 complex and the Golgi-localised, gamma adaptin ear-containing, ARF-binding (GGA) protein (Lui *et al*, 2003; Hirst *et al*, 2005), adaptors that orchestrate formation and cargo loading of a subset of clathrin-coated vesicles from intracellular membranes (Nakayama & Wakatsuki, 2003; Nakatsu *et al*, 2014; Sanger *et al*, 2019). Neither AFTPH or SYNRG were found in our dynein tail pull-downs, suggesting they do not associate with the motor complex or interact less strongly with it than HEATR5B does. RNAi-mediated knockdowns have implicated HEATR5B in AP1-mediated cargo sorting in HeLa cells (Hirst *et al*, 2005), *Drosophila* imaginal discs (Le Bras *et al*, 2012) and *C. elegans* epidermal cells (Gillard *et al*, 2015). The importance of HEATR5B proteins is underscored by the recent finding that hypomorphic mutations in the human gene are associated with the neurodevelopmental syndrome pontocerebellar hypoplasia (Ghosh *et al*, 2021). However, the molecular function of HEATR5B is not clear in any of these systems.

We first asked if HEATR5B is part of a complex with dynein and dynactin in human cells by performing immunoprecipitations from HEK293 cell lines that stably express either GFP-tagged HEATR5B or GFP alone. As expected, association of AFTPH, SYNRG and the AP1 $\gamma$  subunit was detected with GFP-HEATR5B but not the GFP control (Fig 2A). Dynein and dynactin components were also specifically precipitated with GFP-HEATR5B (Fig 2A), corroborating the results of our tail pull-down experiments. To determine if HEATR5B can interact directly with dynein or dynactin, we performed *in vitro* pull-downs with purified proteins. Whilst truncated versions of HEATR5B were unstable and could not be purified, we could produce a full-length GFP-tagged version of the protein in insect cells (Appendix Fig S1). We detected binding of the recombinant dynein tail complex to recombinant GFP-HEATR5B but not GFP alone (Fig 2B). Purified dynactin also interacted specifically with recombinant GFP-HEATR5B (Fig 2B). Our previous finding that association of HEATR5B with the dynein tail in brain extracts is stimulated by dynactin (Fig 1E and F) suggests that HEATR5B can interact simultaneously with both complexes. Compatible with this notion, we did not observe competition between the purified dynein tail and dynactin for HEATR5B binding in our *in vitro* binding assay when both complexes were added simultaneously to the beads (Fig 2B). However, we cannot rule out the possibility that a competitive interaction was masked by binding sites on one of the components not being saturated. Nonetheless, we can conclude from this set of

experiments that HEATR5B complexes with endogenous dynactin and dynein in cell extracts and can interact with both complexes directly.

## HEATR5B is co-transported with AP1-positive endosomal membranes

We next investigated the possibility that HEATR5B is part of a link between AP1-positive membranes and dynein-dynactin. We first asked if HEATR5B co-localises with AP1. Although antibodies to HEATR5B work in immunoblots, they are not suitable for immunostaining of cells. We therefore stained HeLa cells that have a stable integration of the GFP-HEATR5B construct with an antibody to the  $\gamma$  subunit of the adaptor complex (AP1 $\gamma$ ). GFP-HEATR5B was enriched in small puncta in the cytoplasm, ~30% of which co-localised with AP1 $\gamma$  puncta (Fig 3A and B). In contrast, the population of AP1 $\gamma$  that associated with the perinuclear *trans*-Golgi network (TGN, marked with TGN46 antibodies) rarely overlapped with GFP-HEATR5B (Figs 3A and EV1A and B). GFP-HEATR5B puncta also seldomly associated with EEA1-positive early endosomes or LAMP1-positive lysosomal membranes (Figs 3B and EV1B). These results reveal that HEATR5B is selectively enriched on AP1-positive structures in the cytoplasm.

We then tested if the cytoplasmic structures containing HEATR5B and AP1 are motile by live imaging of GFP-HEATR5B HeLa cells transfected with a plasmid coding for an RFP-tagged  $\sigma$ 1 subunit of AP1. As expected from our immunostaining results, HEATR5B and AP1 $\sigma$ 1 were frequently enriched together on punctate structures in the cytoplasm (Fig 3C; Appendix Fig S2A; Movie EV1). During several minutes of filming, the vast majority of the dual-labelled punctate structures exhibited short, oscillatory movements (Movie EV1). This behaviour is reminiscent of the behaviour of early endosomal cargoes for microtubule motors in HeLa cells, which can take tens of minutes to traverse the cytoplasm (Flores-Rodríguez *et al*, 2011; Zajac *et al*, 2013; preprint: Tirumala *et al*, 2022). However, a small fraction of AP1 $\sigma$ 1 puncta exhibited unidirectional movements of between 1.5 and 10  $\mu$ m both towards and away from the perinuclear region with a mean instantaneous velocity of  $260 \pm 4$  nm/s ( $\pm$  SEM; 22 particles) (Fig 3D; Movie EV2). Thus, AP1-associated membranes can be subjected to long-range transport.

AP1 is implicated in the anterograde movement of cargoes from the TGN to recycling endosomes, as well as a reverse process that retrieves unbound receptors and SNAREs back to the TGN in order to sustain anterograde trafficking (Cancino *et al*, 2007; Robinson *et al*, 2010; Hirst *et al*, 2012). To confirm that motile HEATR5B-positive structures in the cytoplasm are associated with recycling endosomal membranes, we transfected GFP-HEATR5B HeLa cells with a DsRed-tagged version of the recycling endosome marker RAB11A. HEATR5B and RAB11A signals frequently overlapped in the cytoplasm (Fig 3E; Appendix Fig S2B). As was the case with AP1 $\sigma$ 1 and GFP-HEATR5B, most of the structures positive for RAB11A and GFP-HEATR5B exhibited oscillatory motion, with only a small fraction undergoing long-distance transport (Fig 3F; Movies EV3 and EV4; mean instantaneous velocity of  $264 \pm 8$  nm/s [ $\pm$  SEM; 15 particles]).

The above observations indicate that HEATR5B can associate with AP1-bound endosomal membranes that are capable of directed movement. To determine if dynein contributes to trafficking of these



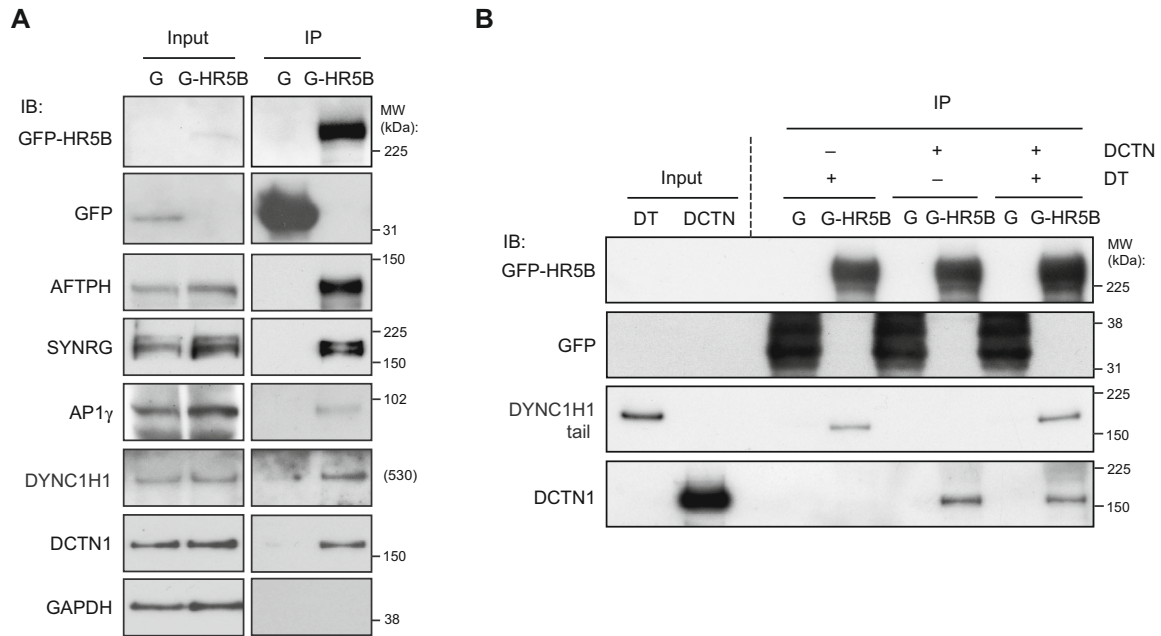

**Figure 2. Confirmation of HEATR5B interaction with dynein and dynactin.**

A, B Immunoblots showing results of (A) immunoprecipitation experiments from GFP-HEATR5B and GFP HEK293 cells and (B) *in vitro* pull-downs with recombinant, bead-associated GFP-tagged human HEATR5B or GFP protein incubated with purified dynein tail and/or dynactin complexes. G-HR5B, GFP-HEATR5B; G, GFP; IP, immunoprecipitate; IB, protein probed by immunoblotting; MW, molecular weight of protein standards (theoretical MW is shown for DYNC1H1 as standards of a similar molecular weight were not available); DT, dynein tail complex; DCTN, dynactin complex. In (A), GAPDH is a negative control.

Source data are available online for this figure.

structures, we examined the distribution of AP1 $\gamma$  in cells treated with an siRNA pool that depletes DYNC1H1 (Appendix Fig S2C). As microtubule minus ends are enriched at the perinuclear microtubule-organising centre (Brinkley, 1985), a role of dynein in AP1 transport should be reflected in more peripheral AP1 $\gamma$  localisation when the motor complex is inhibited. This is indeed what we saw, with AP1 $\gamma$ -associated structures more dispersed in the DYNC1H1 siRNA conditions than in controls treated with a non-targeting control siRNA pool (Fig 3G and H). The dispersed AP1 $\gamma$ -associated structures included TGN material (as judged by strong TGN46 staining), which was previously shown to depend on dynein for perinuclear clustering (Burkhardt *et al*, 1997). However, AP1 $\gamma$  puncta that were positive for RAB11A but lacked robust TGN46 signals, and thus corresponded to the free recycling endosome compartment (Fujii *et al*, 2020a), were also localised more peripherally when DYNC1H1 was depleted (Fig 3G). Based on these data, we conclude that dynein promotes retrograde trafficking of AP1-associated endosomal membranes.

#### HEATR5B promotes membrane localisation and motility of AP1

We next sought to determine if HEATR5B contributes to trafficking of AP1-associated membranes. To this end, we used CRISPR/Cas9-mediated mutagenesis to generate clonal human U2OS cell lines with frameshift mutations in the HEATR5B gene that disrupt protein expression (Appendix Fig S3A and B; Appendix Table S3).

We first used immunostaining to examine the effect of disrupting HEATR5B on the distribution of AP1 in fixed cells. Compared to

parental, wild-type cells, HEATR5B mutant cells had a striking reduction in the number of AP1 $\gamma$  puncta in the cytoplasm, as well as lower intensity of the puncta that were present (Fig 4A–C). This phenotype was seen in three independent HEATR5B mutant U2OS clones and was fully rescued by transfection of a GFP-HEATR5B construct (Appendix Fig S4; Fig EV2A), confirming the causal nature of the HEATR5B mutation. To better understand the nature of the phenotype, we visualised RAB11A together with AP1 $\gamma$  in control and mutant cells (Fig 4A). As expected, in the control cells punctate signals of both proteins frequently overlapped with each other within the cytoplasm. RAB11A and AP1 $\gamma$  signals did not, however, co-localise precisely, in keeping with a report that AP1 is present on tubular endosomes that have different constituents spatially segregated (Klumperman & Raposo, 2014). In HEATR5B mutant cells, RAB11A-positive structures were still abundant. However, there was a strong reduction in the intensity of AP1 $\gamma$  signal associated with them. These data indicate that disrupting HEATR5B reduces the association of AP1 $\gamma$  with endosomal membranes. We also observed modestly reduced association of AP1 $\gamma$  with the TGN in the HEATR5B mutant cells, which was rescued by transfection of the GFP-HEATR5B construct (Fig EV2A and B). Consistent with reduced AP1 interaction with the recycling compartment, disruption of HEATR5B caused excessive tubulation of Transferrin receptor-positive membranes that were associated with the TGN (Fig EV3A and B). The decreased interaction of AP1 $\gamma$  with endosomal membranes and the TGN in mutant U2OS cells is consistent with the reduction in punctate AP1 signal observed when the HEATR5B orthologue was knocked down with RNAi in *C. elegans* (Gillard

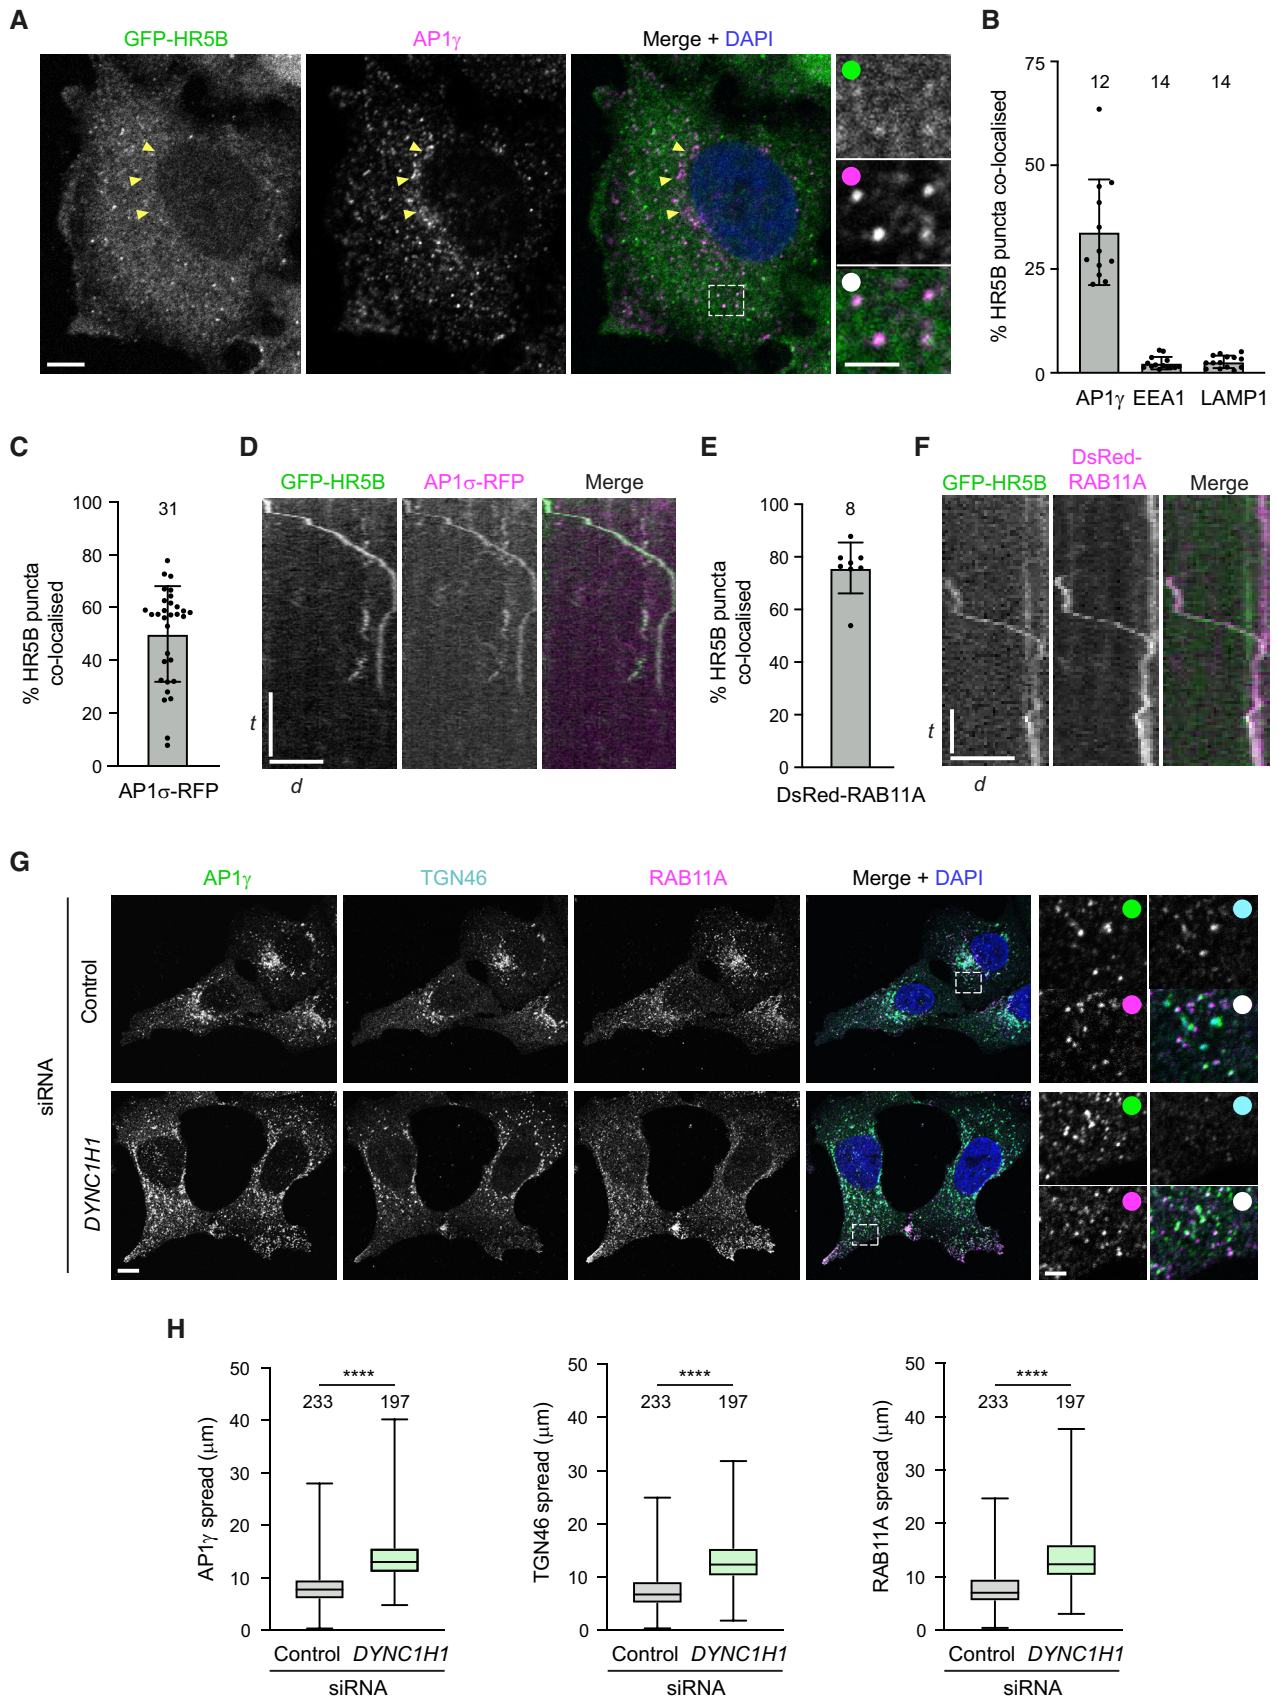

Figure 3.

**Figure 3. HEATR5B is co-transported with AP1 and RAB11A.**

- A Representative confocal images of immunostained HeLa cells showing localisation of GFP-HEATR5B (HR5B) (GFP signal amplified with GFP antibodies) and AP1 $\gamma$ . Yellow arrows, position of TGN-associated AP1 $\gamma$  (which rarely co-localises with GFP-HR5B); dashed box shows area containing multiple co-localisation events that is magnified in right-hand images. In this and other figures, DAPI is used to stain DNA.
- B Quantification of percentage of GFP-HR5B puncta that co-localise with indicated proteins in fixed cells.
- C Quantification of percentage of GFP-HR5B puncta that co-localise with AP1 $\sigma$ 1-RFP in live HeLa cells.
- D Example kymograph (time-distance plot) of a long-range co-transport event of GFP-HR5B and AP1 $\sigma$ 1-RFP.
- E Quantification of percentage of GFP-HR5B puncta that co-localise with DsRed-RAB11A in live HeLa cells.
- F Example kymograph of a long-range co-transport event of GFP-HR5B and DsRed-RAB11A.
- G, H Representative confocal images (G) and quantification (H) of spread of the indicated protein signals away from the perinuclear region in immunostained U2OS cells  $\pm$  *DYNC1H1* siRNA.

Data information: In (A and G), white circles indicate merge of magnified images. In (D and F),  $d$  = distance and  $t$  = time. Scale bars: (A) 10  $\mu$ m; (A) insets, 2  $\mu$ m; (D) 20  $\mu$ m and 20 s; (F) 10  $\mu$ m and 10 s; (G) 10  $\mu$ m; (G) insets 2.5  $\mu$ m. In (B, C, E and H), number of cells analysed is shown above columns. In (B, C, E and H), circles indicate values from individual cells, with columns and error bars representing mean  $\pm$  SD. In (H), boxes show interquartile range (25<sup>th</sup>–75<sup>th</sup> percentile of values) and horizontal line is the median; statistical significance was evaluated with an unpaired two-tailed t-test: \*\*\*\* $P$  < 0.0001.

Source data are available online for this figure.

et al, 2015) and *Drosophila* wing discs (Le Bras et al, 2012). However, these earlier studies did not determine if targeting HEATR5B affects expression, stability or membrane recruitment of AP1. Immunoblotting of extracts showed that the overall level of AP1 $\gamma$  protein was not altered in the *HEATR5B* mutant U2OS cells (Fig 4D). We therefore conclude that HEATR5B promotes recruitment of AP1 to endosomal membranes and, to a lesser extent, the TGN.

Our previous observation that bright AP1 $\gamma$  puncta are abundant in cells treated with *DYNC1H1* siRNA (Fig 3G) revealed that HEATR5B does not co-operate with dynein to promote AP1 membrane localisation. However, a small but significant dispersion of total AP1 $\gamma$  signal towards the periphery of *HEATR5B* mutant U2OS cells (Fig 4E) was consistent with HEATR5B having an additional function in dynein-based motility of AP1-bound membranes. To directly assess the contribution of *HEATR5B* to motility of AP1, we performed high-speed imaging of AP1 $\sigma$ 1-RFP in live wild-type and mutant U2OS cells (Movie EV5). As expected from our fixed cell analysis, AP1 $\sigma$ 1 puncta were dimmer in the *HEATR5B* deficient cells than in controls (Fig EV3C). In both genotypes, the low intensity of AP1 $\sigma$ 1-RFP puncta meant that many of these structures could only be followed for a few seconds before the signals bleached. Nonetheless, mean square displacement (MSD) analysis over this timescale revealed that the motility of AP1 $\sigma$ 1 puncta in the cytoplasm of mutant cells was much less persistent than in controls (Fig 4F). The impaired transport of AP1-positive structures when *HEATR5B* was disrupted was not an indirect effect of reduced AP1 association with membranes, as the motility defect was still evident for AP1 $\sigma$ 1 puncta that had equivalent intensities in control and *HEATR5B* mutant cells (Fig EV3C). Staining of *HEATR5B* deficient cells with an antibody to  $\alpha$ -Tubulin indicated that altered AP1 $\sigma$ 1 motility was also not due to impaired integrity of the microtubule network (Fig EV3D). Collectively, these data indicate that HEATR5B directly promotes motility of AP1-positive structures in U2OS cells.

We next asked if HEATR5B is sufficient to redistribute AP1-associated membranes by strongly expressing GFP-HEATR5B in U2OS cells via transfection. Compared to control cells in which only GFP was expressed, GFP-HEATR5B expressing cells had increased perinuclear clustering of RAB11A-associated membranes that were also positive for AP1 $\gamma$  and the DCTN1 subunit of the dynactin complex (Fig 4G–I), and were in the vicinity of the TGN (Appendix Fig S5). These observations suggest that HEATR5B stimulates

retrograde trafficking of AP1-associated endosomal membranes by dynein-dynactin.

### The *Drosophila* HEATR5B homologue is an essential gene

Our experiments in human tissue culture cells revealed that HEATR5B promotes recruitment of AP1 to endosomal membranes, as well as the motility of these structures. To assess the importance of HEATR5B function at the organismal level, as well as in polarised cell types, we generated a strain of the fruit fly *Drosophila melanogaster* with an early frameshift mutation in the single *HEATR5B* homologue (CG2747, hereafter called *Heatr5*) (Appendix Fig S6A). This was achieved by combining a Cas9 transgene that is active in the female germline (*nos-cas9*) with a transgene expressing two gRNAs that target *Heatr5* (*gRNA-Hr5<sup>1+2</sup>*) (Appendix Fig S6A). Zygotic *Heatr5* homozygous mutants (*Hr5<sup>1</sup>/Hr5<sup>1</sup>*) failed to reach adulthood (Fig 5A), with most animals dying during the 2<sup>nd</sup> larval instar stage (Appendix Fig S6B). The lethal phenotype was not complemented by a pre-existing deletion of a genomic region that includes the *Heatr5* gene (Appendix Fig S6B) but was fully rescued by a wild-type *Heatr5* transgene (Fig 5A). Thus, the lethality observed was due to the *Heatr5* mutation and not an off-target effect of the gRNAs.

To examine the maternal requirement for *Heatr5*, we followed the development of the embryos laid by *nos-cas9 gRNA-Hr5<sup>1+2</sup>* mothers. The vast majority of embryos did not hatch into larvae (Fig 5B), instead arresting during late embryogenesis. These embryos, which presumably had biallelic disruption of *Heatr5* in the female germline, typically had denticle hairs that were either absent or short and thin (Fig 5C; Appendix Fig S6C). This phenotype is reminiscent of that of mutants for Syntaxin-1A, which promotes apical protein secretion (Schulze & Bellen, 1996; Moussian et al, 2007). Taken together, these results demonstrate that *Heatr5* has essential zygotic and maternal functions in *Drosophila*.

### Heatr5 strongly promotes dynein-based transport of AP1-positive structures in the fly embryo

We next set out to understand the effect of disrupting *Heatr5* on AP1-based trafficking in *Drosophila*. For these experiments, we used the syncytial blastoderm embryo as a model. This system is attractive because the microtubule cytoskeleton is highly polarised with



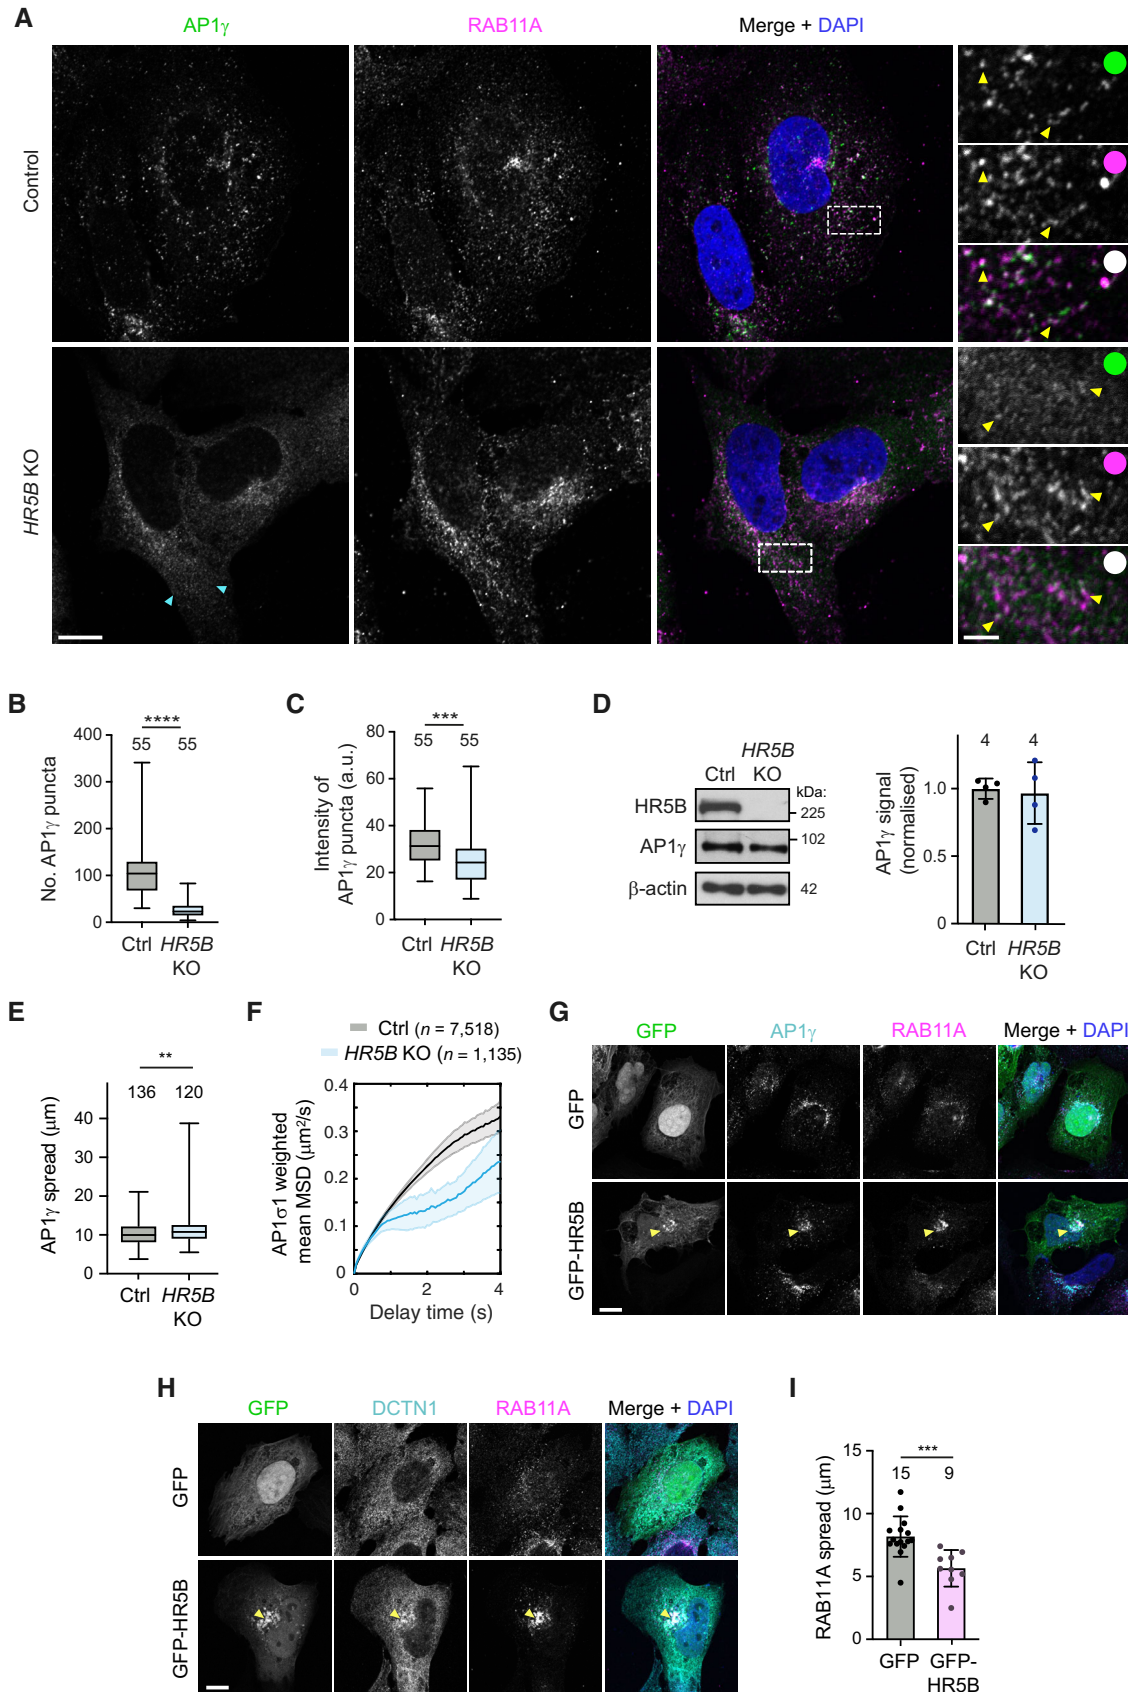

Figure 4.

**Figure 4. HEATR5B promotes AP1 membrane localisation and motility.**

- A Representative confocal images of AP1 $\gamma$  and RAB11A in immunostained wild-type (control) and *HEATR5B* mutant (*HR5B* KO) U2OS cells. Dashed box shows region magnified in right-hand images. Blue arrowheads show diffuse AP1 $\gamma$  signal in the cytoplasm of mutant cells. Yellow arrowheads in insets show examples of AP1 $\gamma$  association with RAB11A. White circles indicate merge of magnified images.
- B, C Quantification of number (B) and mean total intensity (C) of AP1 $\gamma$  puncta in control (Ctrl) and *HR5B* KO U2OS cells (a.u., arbitrary units).
- D Left, immunoblot images showing levels of HR5B and AP1 $\gamma$  in control and *HR5B* KO U2OS cells ( $\beta$ -actin, loading control). Right, quantification of AP1 $\gamma$  signal (normalised to  $\beta$ -actin signal).
- E Quantification of spread of total AP1 $\gamma$  signal away from the perinuclear region in control and *HR5B* KO U2OS cells. Both punctate and diffuse signals were quantified.
- F Quantification of weighted mean MSD of AP1 $\sigma$ 1-RFP puncta in control and *HR5B* KO U2OS cells.
- G, H Representative confocal images showing localisation of RAB11A (G and H), AP1 $\gamma$  (G) and DCTN1 (H) in cells that strongly express GFP-*HR5B* or a GFP control. Arrowheads show perinuclear clustering of signals in GFP-*HR5B* cells. GFP signals were not amplified by antibodies.
- I Quantification of spread of RAB11A signal away from perinuclear region in GFP or GFP-*HR5B* overexpressing U2OS cells.
- Data information: Scale bars: (A) 10  $\mu$ m; (A) insets 2.5  $\mu$ m; (G and H) 5  $\mu$ m. In (B, C, and E), boxes show interquartile range (25<sup>th</sup>–75<sup>th</sup> percentile of values) and horizontal line is the median. In (I), circles indicate values from individual cells; columns and error bars represent mean  $\pm$  SD. Number of cells (in B, C, E and I) or independent experiments (D) analysed is shown above columns. In (F),  $n$  = number of particles (from 31 control and 17 KO U2OS cells). Statistical significance was evaluated with an unpaired two-tailed t-test: \*\*\*\* $P$  < 0.0001; \*\*\* $P$  < 0.001; \*\* $P$  < 0.01. Source data are available online for this figure.

minus ends nucleated apically above the nuclei and plus ends extended basally (Karr & Alberts, 1986; Warn & Warn, 1986). This means that the activity of dynein and kinesin motors can be distinguished by the direction of cargo movement (Shubeita *et al.*, 2008). Moreover, membranes can be readily visualised by microinjection of antibodies coupled to bright fluorophores into the shared cytoplasm of the syncytium (Sisson *et al.*, 2000; Papoulas *et al.*, 2005).

We first analysed the effect of *Heat5* depletion on AP1 distribution in blastoderm embryos by immunostaining embryos laid by control and *nos-cas9 gRNA-Hr5<sup>1+2</sup>* mothers with antibodies to AP1 $\gamma$ . Bright AP1 $\gamma$  puncta were abundant in the cytoplasm of control embryos, particularly in the region basal to the nuclei (Fig 5C). In contrast, embryos of *nos-cas9 gRNA-Hr5<sup>1+2</sup>* females had AP1 $\gamma$  puncta that were much fewer in number and much dimmer (Fig 5C and D), reminiscent of the situation in *HEATR5B* deficient human cells. This phenotype was confirmed with an independent pair of *Heatr5* gRNAs (Appendix Fig S7A and B), as was the failure of mutant embryos to develop to larval stages (Appendix Fig S7C). As in *HEATR5B* deficient human cells, the change in AP1 $\gamma$  distribution in *nos-cas9 gRNA-Hr5* embryos was not due to altered total amounts of AP1 $\gamma$  protein (Appendix Fig S7D). These observations reveal a conserved role of *HEATR5B* proteins in localising AP1 to membranes.

We next examined motility of AP1-positive structures in live embryos. This was achieved by labelling the AP1 $\gamma$  antibodies with Alexa555-coupled secondary antibodies, injecting the conjugates into the embryo at the junction of the yolk and basal cytoplasm (Appendix Fig S8A), and filming the peripheral region of the embryo for several minutes. Following injection of the antibody conjugates into control embryos, fluorescent puncta formed that underwent rapid, bidirectional transport in the cytoplasm. These movements had a strong net apical bias, often pausing or arresting just beneath the peripheral blastoderm nuclei (Fig 6A; Appendix Fig S8B; Movie EV6). Punctate signals were not observed with fluorescent secondary antibodies injected alone or when bound to control primary antibodies (Appendix Fig S8C), confirming their dependence on the AP1 $\gamma$  antibody.

We next injected the fluorescent AP1 $\gamma$  antibody conjugates into *nos-cas9 gRNA-Hr5<sup>1+2</sup>* embryos. As expected, the AP1 $\gamma$  puncta in

these embryos were considerably dimmer than those observed in the control. Nonetheless, the antibody labelling method meant they were bright enough to be followed throughout the period of filming. In the mutant embryos, the rate of net apical movement of AP1 $\gamma$  puncta was strongly impaired. The puncta mostly exhibited short-range saltatory movements or pausing behaviour (Appendix Fig S8B; Movie EV6), and consequently rarely reaching the region beneath the blastoderm nuclei during the period of image acquisition (Fig 6A). A defect in the rate of net apical transport in mutant embryos was confirmed by automated tracking of particle movement, which additionally revealed significant reductions in the apical velocity and run length of AP1 $\gamma$  signal compared to the control (Fig 6B), as well as more modest decreases in the basal velocity and run length (Fig EV4A). These observations show that AP1 undergoes net apical transport in the *Drosophila* embryo and that this process is strongly promoted by *Heatr5*.

As actin structures are concentrated above the nuclei at blastoderm stages (Karr & Alberts, 1986), it is likely that microtubules are the tracks for long-distance transport of AP1 in the basal cytoplasm. Supporting this notion, AP1 $\gamma$  transport in wild-type embryos was arrested by microinjection of the microtubule targeting agent colcemid and rapidly reinitiated when the drug was inactivated with a pulse of UV light (Czaban & Forer, 1985; Movie EV7). The localisation of microtubule minus ends above the blastoderm nuclei strongly suggests that apical AP1 transport is driven by dynein and we confirmed this is the case by injecting wild-type embryos with a function-blocking antibody to Dynein intermediate chain (Dic) (Bullock *et al.*, 2006) prior to injecting the AP1 $\gamma$  antibody conjugate (Fig 6C; Movie EV8). Consistent with the interdependence of dynein and kinesin motors in several bidirectional transport systems (Jolly & Gelfand, 2011), the Dic antibody also impaired some features of plus-end-directed AP1 $\gamma$  motility (Fig EV4B). Thus, the modest impairment of plus-end-directed motion of AP1 $\gamma$  in *Heatr5* mutant embryos could be an indirect effect of dynein inhibition. Together, these experiments demonstrate that *Heatr5* promotes dynein-dependent transport of AP1 along microtubules.

To test if *Heatr5* has a general role in dynein-based transport in the embryo, we assessed mRNA trafficking by the motor in wild-type and *nos-cas9 gRNA-Hr5<sup>1+2</sup>* embryos via microinjection of



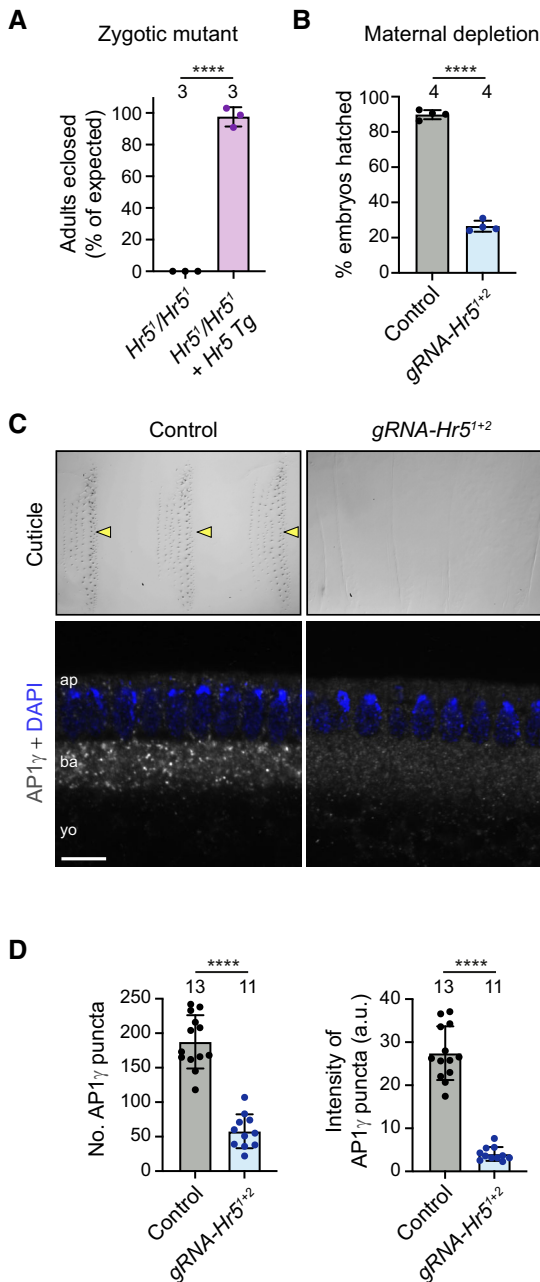

**Figure 5. *Drosophila* Heatr5 is required for viability and promotes membrane association of AP1.**

A Quantification of survival to adulthood of zygotic *Heatr5* (*Hr5*) homozygous mutants in the absence and presence of a wild-type *Hr5* transgene (Tg).

B Quantification of hatching of eggs laid by control (*nos-cas9*) and *nos-cas9* *gRNA-Hr5*<sup>1+2</sup> females.

C Representative images of cuticle preparations of late-stage embryos (top panels) and AP1 $\gamma$  distribution in blastoderm-stage embryos (bottom panels) laid by control and *nos-cas9* *gRNA-Hr5*<sup>1+2</sup> females. Arrowheads point to denticle belts in the control, and “ap”, “ba” and “yo” refer to apical cytoplasm, basal cytoplasm and yolk, respectively. Scale bar in bottom left panel represents 30  $\mu$ m in top left panel, 25  $\mu$ m in top right panel and 10  $\mu$ m in bottom panels.

D Quantification of number and mean total intensity of AP1 $\gamma$  puncta in blastoderm embryos laid by control and *nos-cas9* *gRNA-Hr5*<sup>1+2</sup> mothers.

Data information: In (A, B and D), circles indicate values from individual crosses (A, B) or embryos (D); columns and error bars represent mean  $\pm$  SD; number of independent crosses or embryos analysed is shown above columns (in A and B, at least 80 flies or 200 embryos were analysed per cross); statistical significance was evaluated with an unpaired two-tailed *t*-test: \*\*\*\**p* < 0.0001. Source data are available online for this figure.

strain in which the *trans*-Golgi marker Golgin-245 is endogenously tagged with GFP (Appendix Fig S9) and confirmed that the fusion protein is correctly localised to the dispersed “mini-stacks” that constitute the Golgi apparatus in *Drosophila* cells (Kondylis & Rabouille, 2009; Appendix Fig S10A). Injecting the fluorescent AP1 $\gamma$  antibody conjugate into the GFP-Golgin-245 embryos revealed that AP1 puncta were often transported to, and engaged with, the periphery of Golgin-245-positive structures or were trafficked together with them (Fig 7A; Appendix Fig S10B; Movies EV10–EV12). Consistent with these observations, AP1 $\gamma$  puncta were frequently located adjacent to Golgin-245 puncta in fixed, uninjected embryos (Appendix Fig S10C). These findings suggest that microtubule-based transport of AP1-associated membranes facilitates their interaction with Golgi membranes.

Staining of fixed YFP-Rab11 knock-in embryos (Dunst *et al*, 2015) demonstrated that many of the AP1 $\gamma$ -positive structures in the basal cytoplasm associated with Rab11 (Appendix Fig S10D). However, AP1 $\gamma$  and Rab11 signals rarely overlapped precisely. This finding suggests that, as in U2OS cells (Fig 4A), these proteins are present on closely opposed or conjoined endosomal membrane structures. In contrast, AP1 $\gamma$  was not enriched in the vicinity of the pool of Rab11 that is located at the apically positioned microtubule-organising centre (Pelissier *et al*, 2003; Appendix Fig S10D). These observations implicate the transported AP1 structures in trafficking events in the basal cytoplasm involving membranes of the recycling endosome compartment and the Golgi apparatus.

### Heatr5 is required for Golgi organisation in the *Drosophila* embryo

Finally, we investigated if the AP1 membrane recruitment and trafficking defects in *Heatr5*-deficient embryos are accompanied by defects in Golgi morphology. We compared the distribution in control and *Heatr5* mutant embryos of the Golgin-245, GM130 and Golgin-84 golgin proteins, which are enriched, respectively, in the *trans*-Golgi, *cis*-Golgi and rims of the Golgi stack (Kondylis & Rabouille, 2009; Munro, 2011). In contrast to the small Golgi stacks

fluorescent *bicoid* (*bcd*) RNA (Bullock & Ish-Horowicz, 2001; Wilkie & Davis, 2001; Snee *et al*, 2005; Bullock *et al*, 2006). Neither apical nor basal mRNA transport was significantly impaired by disruption of *Heatr5* (Figs 6D and EV4C; Movie EV9). Thus, *Heatr5* selectively promotes dynein-mediated transport of AP1-positive structures in the embryo.

### Heatr5-dependent AP1 trafficking routes in the embryo involve endosomal and Golgi membranes

To next sought to shed light on the trafficking routes of the transported AP1-associated structures in the embryo. To this end, we used CRISPR-mediated homology-directed repair to generate a fly

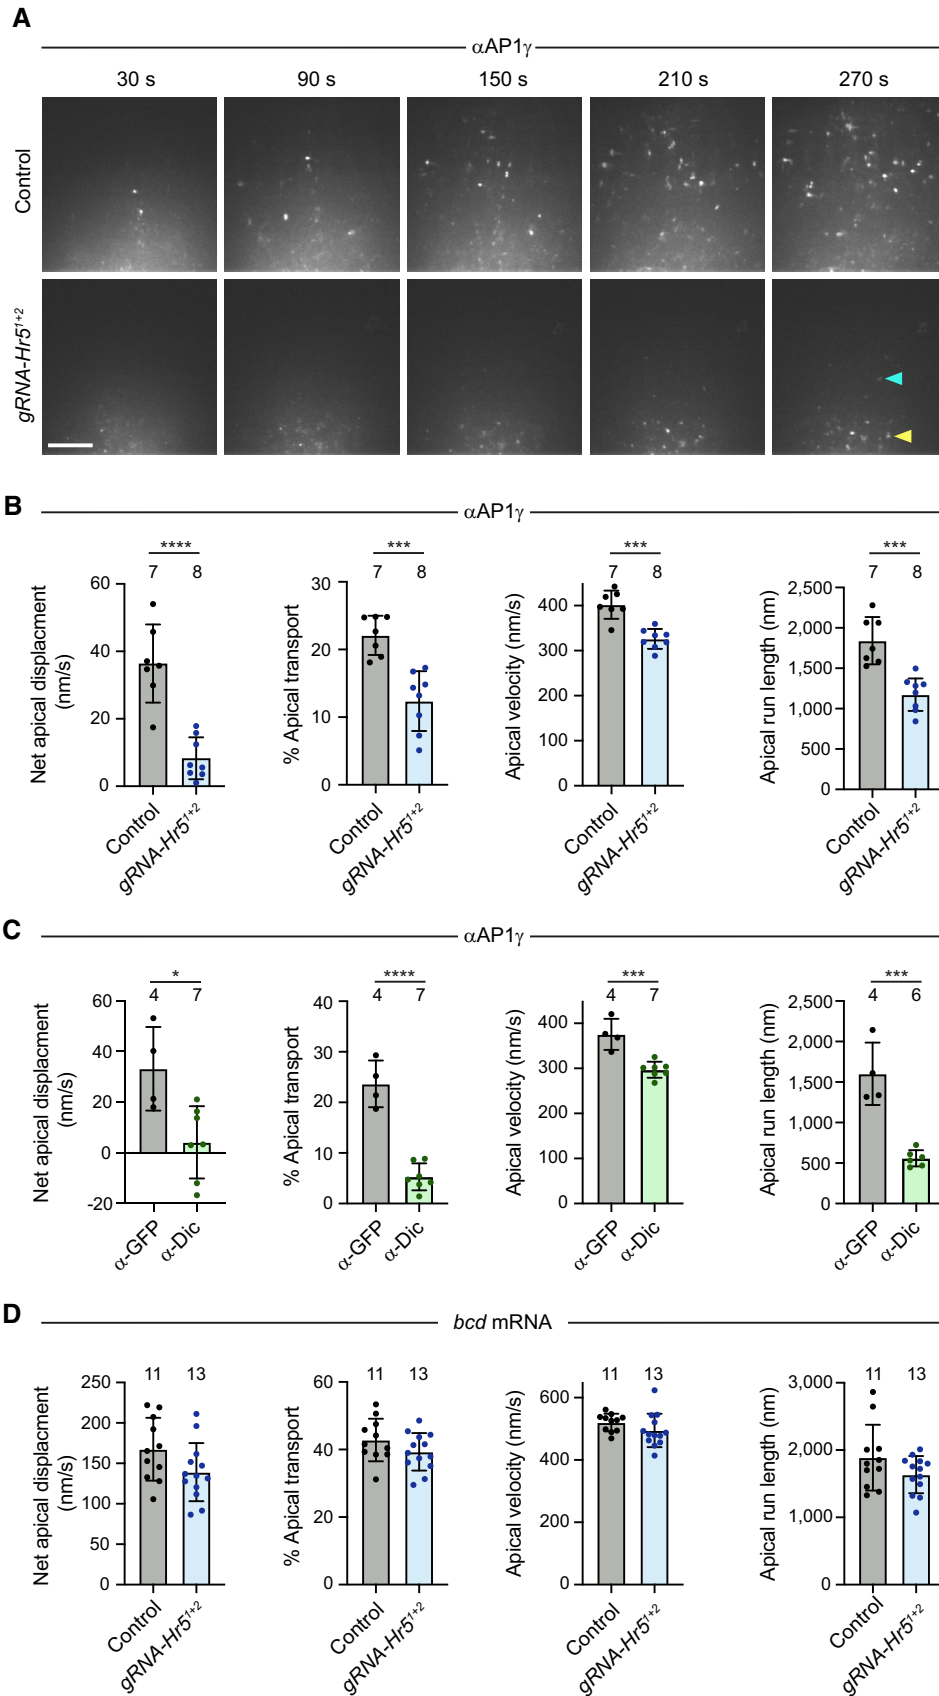

Figure 6.

**Figure 6. Heatr5 promotes dynein-based motility of AP1-positive structures in the blastoderm embryo.**

A Stills from representative image series of blastoderm embryos from control (*nos-cas9*) and *nos-cas9 gRNA-Hr5<sup>1+2</sup>* mothers injected at the junction of the yolk and basal cytoplasm with fluorescent AP1 $\gamma$  antibody conjugates. Yellow arrowhead, basally concentrated puncta in mutant embryo; blue arrowhead, rare punctum that underwent long-range apical transport in mutant embryo (see Movie EV6). Scale bar, 10  $\mu$ m.

B–D Quantification of motility of AP1 $\gamma$  (B, C) and injected *bcd* mRNA (D) in embryos of control and *nos-cas9 gRNA-Hr5<sup>1+2</sup>* mothers (B, D) or wild-type embryos pre-injected with function-blocking Dic antibodies or control GFP antibodies (C). “% apical” is the percentage of the particle trajectory time that is classed as apical transport. Circles are mean values for individual injected embryos; columns and error bars represent means  $\pm$  SD of these mean values; number of embryos analysed is shown above columns (at least 24 particles analysed per embryo); in (C), one  $\alpha$ -Dic injected embryo was omitted from the apical run length analysis as it did not exhibit any runs long enough to meet the threshold for inclusion; statistical significance was evaluated with an unpaired two-tailed t-test: \*\*\*\* $P < 0.0001$ ; \*\*\* $P < 0.001$ ; \* $P < 0.05$ .

Source data are available online for this figure.

distributed throughout the basal cytoplasm in the wild-type embryo, the *Heatr5* mutant embryos had large conglomerations of all three proteins in the region of the basal cytoplasm just beneath the nuclei (Fig 7B; quantification in Fig EV5). Of the three Golgi proteins analysed, Golgin-245 showed a particularly strong conglomeration phenotype in the mutant.

Increased aggregation of Golgi stacks has previously been observed in *Drosophila* S2 cells treated with brefeldin A (Fujii *et al*, 2020b), which impairs AP1 association with membranes by targeting ARF1 function (Donaldson *et al*, 1992; Helms & Rothman, 1992). Conglomeration of golgin signals in *Heatr5* mutant embryos may therefore reflect impaired release of material from the Golgi due to inefficient targeting of AP1 complexes to this organelle. Based on these observations, we propose that *Heatr5*-mediated transport of AP1 complexes to the Golgi stimulates post-Golgi trafficking in the embryo. We additionally discovered that a fraction of Golgin-245 was ectopically localised in the yolk in *Heatr5* mutant embryos (Fig 7B; quantification in Fig EV5). This result raises the possibility that *Heatr5* also contributes to transport of this protein from an internal pool to the cytoplasm.

## Discussion

### Novel interactors of the dynein tail

In addition to known co-factors, our recombinant tail-based screening strategy revealed ~50 novel candidate interactors of the dynein complex in brain extracts. Several of these proteins had their association with the tail enhanced by dynactin. The novel dynein tail interactors may not have been found in previous dynein “interactomes” (Gershoni-Emek *et al*, 2016; Redwine *et al*, 2017) because these studies used full-length DYNC1H1, in which the presence of the motor domain can impair cargo association with the tail (Zhang *et al*, 2017; Htet *et al*, 2020), as well as different cell types or subcellular compartments as a source of potential interactors. Sequence analysis revealed that only ~20% of the total set of dynein-interacting proteins in our experiments contain a predicted coiled-coil domain (Appendix Tables S1 and S2), suggesting that many of them interact indirectly with the motor complex or bind directly through a mode distinct from that of canonical activating adaptors. Whilst we prioritised HEATR5B—one of the dynactin-stimulated interactors—for mechanistic analysis in this study, we anticipate that investigating other hits from our screen will shed further light on dynein’s cargo linkage and regulation. Of particular note, we observed a large number of ribosomal proteins and other

RNA-associated proteins in our dynein tail interactomes. These factors are candidates to participate in dynein-mediated trafficking of messenger ribonucleoprotein particles (mRNPs) (Mofatteh & Bullcock, 2017). Other intriguing hits include the dynactin-stimulated tail interactor Wdr91, a Rab7 effector implicated in endosomal recycling and lysosomal function (Xing *et al*, 2021; Liu *et al*, 2022), as well as reovirus infection (Snyder *et al*, 2022). In addition to analysing the current set of dynein interactors, it may be possible in the future to adapt our pulldown approach to identify more transient interactors of the motor complex, for example by incorporating a biotin ligase on the dynein tail for proximity-dependent biotinylation (Samavarchi-Tehrani *et al*, 2020).

### HEATR5B promotes AP1 membrane localisation and motility

HEATR5B was first identified in human cells through its association with AFTPH, which contains a motif that binds the AP1 $\gamma$  “ear” domain (Lui *et al*, 2003; Hirst *et al*, 2005). It was shown that AFTPH and HEATR5B form a stable complex with SYNRG and that knocking down the function of this assembly causes partial rerouting of AP1 cargoes from the TGN to a more peripheral compartment (Hirst *et al*, 2005). RNAi-based knockdowns subsequently implicated HEATR5B orthologues in AP1-based trafficking of components of the Notch signalling pathway in *Drosophila* imaginal discs (Le Bras *et al*, 2012) and E-cadherin in *C. elegans* epidermal cells (Gillard *et al*, 2015). How HEATR5B mechanistically influences AP1 function in these systems was not, however, investigated.

It was previously shown that the budding yeast homologue of *Heatr5B*—Laa1—is required for membrane recruitment of AP1 (Fernandez & Payne, 2006; Zysnarski *et al*, 2019). We have shown that HEATR5B proteins also promote association of AP1 with membranes in human and *Drosophila* cells. Thus, HEATR5B has widespread roles in membrane targeting of AP1. In budding yeast, the ability of Laa1 to promote AP1 membrane association depends on another protein, Laa2 (Zysnarski *et al*, 2019). It is unclear how HEATR5B promotes AP1 membrane association in higher eukaryotes, as an overt orthologue of Laa2 is missing. However, our data indicate that this process is independent of HEATR5B’s ability to bind dynein. We provide evidence that HEATR5B’s interaction with the motor complex instead promotes microtubule-based trafficking of AP1-associated endosomal membranes. Thus, HEATR5B has a central role in controlling the function of AP1, co-ordinating its association with membranes and microtubule-based transport of these structures.

Work by several groups has demonstrated the importance of coiled-coil-containing activating adaptors in linking dynein to

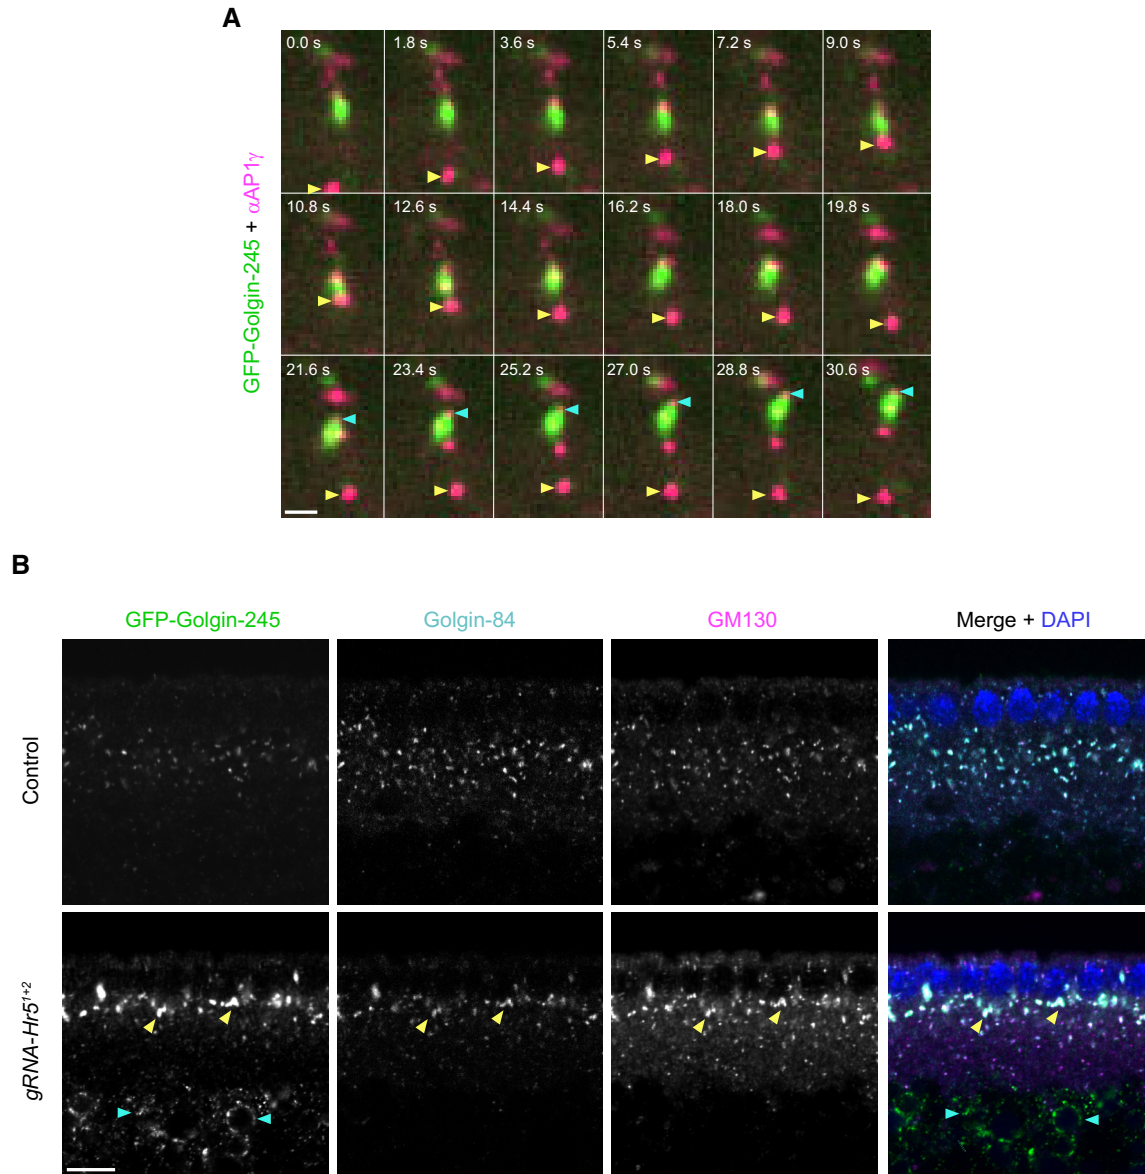

**Figure 7. *Drosophila* Heatr5 promotes transport of AP1-positive structures to the Golgi and is required for Golgi organisation.**

A Stills from representative image series of GFP-Golgin-245 knock-in embryos injected with fluorescent AP1 $\gamma$  antibody conjugates. Yellow arrowhead shows an AP1 $\gamma$ -positive structure that is transported apically, interacts with a Golgi body and is then transported basally. Blue arrowhead shows AP1 $\gamma$  at the front of an apically transported Golgi body.

B Representative confocal images of GFP-Golgin-245, Golgin-84 and GM130 distribution in embryos from control (*nos-cas9*) and *nos-cas9 gRNA-Hr5<sup>1+2</sup>* mothers. Yellow and blue arrowheads show, respectively, examples in mutant embryo of expanded Golgi structures beneath the nuclei and ectopic accumulation of GFP-Golgin-245 in the yolk.

Data information: Scale bars: (A) 2  $\mu$ m; (B) 10  $\mu$ m.

Source data are available online for this figure.

cargoes and dynactin, and thus initiating long-distance cargo transport (Reck-Peterson *et al*, 2018; Olenick & Holzbaaur, 2019). Whilst our data demonstrate a role for HEATR5B proteins in promoting AP1 transport, including long-range dynein-based movements in the fly embryo, several observations suggest they are unlikely to act analogously to an activating adaptor as a primary link between AP1-associated membranes and dynein. Firstly, HEATR5B proteins lack the coiled-coil domains that are typical of activating adaptors.

Secondly, our observation of residual dynein-based motility of AP1-positive membranes in *nos-cas9 gRNA-Hr5* *Drosophila* embryos shows the cargo can still be linked to the motor complex when HEATR5B is disrupted. And thirdly, in ongoing work, we have failed to detect *in vitro* activation of dynein-dynactin motility by purified HEATR5B. We therefore favour a scenario in which HEATR5B enhances the function of a dynein-dynactin-activating adaptor complex on AP1-associated membranes. The involvement of an as-



of-yet unidentified activating adaptor may also explain why we observed stimulation of dynein's association with HEATR5B by dynactin in cellular extracts but not with purified proteins.

HEATR5B consists almost entirely of repeats of HEAT domains, ~40 amino acid motifs of anti-parallel  $\alpha$ -helices separated by a short linker (Andrade & Bork, 1995; Groves *et al*, 1999). The ability of HEAT repeat proteins to act as flexible scaffolds for protein–protein interactions (Grinthal *et al*, 2010; Yoshimura & Hirano, 2016) raises the possibility that HEATR5B promotes transport by stabilising a dynein-dynactin-activating adaptor assembly and/or its association with the membrane. Intriguingly, another non-coiled-coil protein involved in cargo transport by dynein-dynactin, Ankyrin-B (Lorenzo *et al*, 2014), also contains a large number of  $\alpha$ -helical ankyrin repeats. It is tempting to speculate that the repeated units in Ankyrin-B and HEATR5B play an analogous role in scaffolding dynein-dynactin-activating adaptor-cargo complexes.

Future efforts will be directed at identifying additional proteins that link AP1 to dynein and dynactin and determining how HEATR5B affects the motility of the entire machinery when it is reconstituted *in vitro*. It will also be important to determine if and how HEATR5B puncta contributes to transport of other cargoes by dynein. Whilst our microinjection of mRNAs in mutant fly embryos show that HEATR5B is not a general regulator of dynein activity, the finding that a substantial fraction of HEATR5B puncta in human cells do not overlap with AP1 raises the possibility of involvement in transport of additional cargoes.

### The role of HEATR5B and dynein in AP1-based membrane trafficking

Dynein plays a role in multiple trafficking events in the endocytic pathway, including transport of peripheral early endosomes, late endosomes and lysosomes, as well as sorting of internalised receptors through these compartments (Burkhardt *et al*, 1997; Jordens *et al*, 2001; Lalli *et al*, 2003; Driskell *et al*, 2007; Traer *et al*, 2007; Loubery *et al*, 2008; Hong *et al*, 2009; Horgan *et al*, 2010; Guo *et al*, 2016; Jongsma *et al*, 2023). The range of dynein functions makes it challenging to study specific trafficking processes by targeting the motor complex. Our analysis of HEATR5B highlights a novel dynein-based process for retrograde trafficking of AP1-associated endosomal material to the Golgi apparatus (Robinson *et al*, 2010; Hirst *et al*, 2012). This process appears to be distinct from a previously identified dynein- and RAB11FIP3-dependent process for moving material between RAB11A-positive recycling endosomes and the TGN (Horgan *et al*, 2010; McKenney *et al*, 2014) because RAB11A and AP1 are not enriched on the same domain of tubular endosomal structures. We envisage the two dynein-based pathways acting in parallel to ensure efficient delivery of endosomal material to the TGN, or translocating distinct sets of proteins that are sorted into endosomal membrane domains enriched with AP1 or RAB11A. Our observation in human cells that HEATR5B co-localises with AP1-positive membranes in the cytoplasm but not at the TGN suggests a mechanism for limiting dynein activity on AP1 cargoes at the Golgi. This process presumably facilitates kinesin-driven cargo trafficking in the anterograde direction (Nakagawa *et al*, 2000; Schmidt *et al*, 2009), thus ensuring bidirectional trafficking.

In addition to trafficking cargoes, HEATR5B-mediated transport may promote delivery of the AP1 complex from endosomal

membranes to the TGN, where it is needed for clathrin-mediated budding of post-Golgi membranes. In support of this notion, we observed long-range transport of AP1-associated membranes from the basal cytoplasm to Golgi stacks in the wild-type *Drosophila* embryo. Moreover, impairment of this process in *Heatr5* mutant embryos was accompanied by reduced association of AP1 with the Golgi and a large increase in the size of the *trans*-Golgi compartment. Our observations of partially reduced AP1 localisation with the TGN and excessive tubulation of TGN-associated membranes in HEATR5B deficient human cells is consistent with dynein-mediated delivery of AP1 complexes contributing to post-Golgi trafficking in other systems. To what extent defects in this and other aspects of AP1 trafficking are involved in the neurodevelopmental syndrome associated with hypomorphic HEATR5B mutations (Ghosh *et al*, 2021) is another important question to address in the future.

## Materials and Methods

### Cell culture

*Spodoptera frugiperda* (fall armyworm) Sf9 insect cells (Oxford Expression Technologies Ltd) were cultured at 27°C in Insect-XPRESS protein-free insect medium with L-Glutamine (Lonza) in shaking suspension. HEK293 Flp-in cells (provided by A. Castello, MRC-University of Glasgow Centre for Virus Research, UK), HeLa Flp-In cells (Kaiser *et al*, 2008; provided by E. Dobrikova and M. Gromeier, Duke University Medical Center, USA), and unmodified U2OS cells and HeLa cells (both provided by H. McMahon, MRC-LMB, Cambridge, UK) were cultured at 37°C with 5% CO<sub>2</sub> in complete DMEM (high glucose DMEM + GlutaMax [Gibco], 10% foetal bovine serum [Gibco] and 1% Penicillin/Streptomycin solution [Gibco]). Flp-In cells were maintained in the presence of 100  $\mu$ g/ml zeocin and 5  $\mu$ g/ml blasticidin (both from Gibco). Cells were checked for the absence of *Mycoplasma* using the MycoAlert kit (Lonza) at the onset of the study.

### Plasmids

pIDC-LIC2-IC2C-Tctex1-Robl1-LC8 (Schlager *et al*, 2014) and pACEBac1-His-ZZ-LTLTL-DYNC1H1E1074-GST (for generating baculovirus for expression of the dynein complex in Sf9 cells) were provided by A. Carter (MRC-LMB, Cambridge, UK). pcDNA3.1-eGFP-HR5B and pcDNA5-FRT/TO-eGFP-HR5B (for, respectively, transient or tetracyclin-inducible expression of human HEATR5B with an N-terminal GFP tag in human cells) were cloned by Gibson assembly with the full-length human HEATR5B open reading frame (derived from plasmid RC22610 [Origene]) and either pcDNA3.1-eGFP-linker or pcDNA5-FRT/TO-eGFP-linker plasmids (coding for eGFP and a GGSGGSGG linker; provided by A. Castello). pOG44 (Invitrogen) was used for expression of Flp recombinase in the Flp-in system. pAP1 $\sigma$ 1-RFP (for expression of fluorescently-tagged AP1 in human cells) was cloned by Gibson assembly using sequences derived from pAP1 $\sigma$ 1-eGFP (Addgene plasmid 53611) and pTagRFP-RAB2A (provided by S. Munro, MRC-LMB, Cambridge, UK). pDsRed-RAB11A WT (for expression of a fluorescently-tagged, wild-type version of RAB11A in human cells) was obtained from Addgene (plasmid 12679). For expression of GFP-HEATR5B



from baculovirus, pACEBac1 eGFP-HR5B-PreSci-2xStrep tagII (tagged at the N-terminus with eGFP+linker and including a protease PreScission site and 2 Strep Tag II sequences at the C-terminus) was constructed by Gibson assembly using plasmids pACEBac1-G (containing the PreSci-2xStrep tagII sequence; provided by Eeson Rajendra [MRC-LMB, Cambridge, UK]), and pcDNA3.1 eGFP-HR5B. The sequences of all plasmids were confirmed by Sanger sequencing before use.

### Protein expression and purification

#### Human dynein tail complex

Baculovirus encoding the human dynein tail complex was produced using published procedures (Schlager *et al*, 2014). Briefly, pACEBac1-His-ZZ-LTLTL-DYNC1H1E1074-GST and pIDC-LIC2-IC2C-Tctex1-Robl1-LC8 were recombined by Cre-mediated fusion and incorporated into the baculovirus genome by transformation into EMBAcY bacterial cells. Sf9 cells (500 ml cell suspension at  $2 \times 10^6$  cells/ml) were infected with baculovirus and cultured for a further 72 h before cell pelleting by centrifugation. Pellets were lysed by Dounce homogenisation in lysis buffer (25 mM Hepes pH 7.2, 100 mM NaCl, 10 mM imidazole, 10% Glycerol, 1 mM DTT, 0.1 mM ATP, 1× COMPLETE protease inhibitor (Roche) and 0.8 mM PMSF). The lysate was centrifuged for 45 min at 504,000 g in a Ti70 rotor and the supernatant loaded in a 5-ml HisTrap Ni-NTA column using an AKTA Purifier system (Cytiva). The column was washed with eight column volumes of 10% (v/v) elution buffer (lysis buffer containing 500 mM imidazole) and the protein complex eluted using a step gradient of elution buffer (from 10 to 40%). The relevant fractions were collected, pooled and filtered through a 0.22- $\mu$ m filter before ion exchange purification on a MonoQ column (10 ml, 5/50 GL [Sigma]) that was pre-equilibrated in lysis buffer. After washing with 10 column volumes of 10% buffer B (lysis buffer including 1 M imidazole), the protein complex was eluted using a step gradient of buffer B (from 10 to 50%). Fractions were collected and analysed by SDS-PAGE, followed by pooling of fractions of interest, dispensing into aliquots, and flash freezing in N<sub>2</sub> for storage at  $-80^\circ\text{C}$ .

#### GFP-HEATR5B

Sf9 cells (2-l cell suspension at  $2 \times 10^6$  cells/ml) were infected with baculovirus incorporating the GFP-HEATR5B expression cassette and cultured for a further 72 h before cell pelleting by centrifugation. Cell pellets were lysed by resuspension and Dounce homogenisation (50 strokes) in lysis/washing buffer (LWB: 10 mM Tris-HCl pH 8.0, 150 mM NaCl, 0.5 mM EDTA, 1 mM DTT, 1× COMPLETE protease inhibitors and 2 mM PMSF). The lysate was centrifuged for 30 min at 92,600 g using a Ti70 rotor. The supernatant was collected and loaded in a 5 ml Strep-Trap HP column (Cytiva) that was pre-equilibrated with LWB. After washing with 20 column volumes of LWB, the protein was eluted with 10 column volumes of elution buffer (LWB including 3 mM desthiobiotin [Sigma]). Fractions containing GFP-HEATR5B were pooled and the protein solution (3 ml) injected in a HiLoad 16/60 Superdex 200 Prep grade column (Cytiva) pre-equilibrated with gel filtration buffer (10 mM Tris HCl pH 7.4, 150 mM NaCl and 0.5 mM TCEP). Fractions were collected and analysed by SDS-PAGE, followed by pooling of relevant fractions, concentrating using an Amicon Ultra 4 centrifugal filter unit

(100 kDa MWCO [Merck]) to 1 mg/ml, dispensing into aliquots, and flash freezing in N<sub>2</sub> for storage at  $-80^\circ\text{C}$ .

#### Dynactin

Dynactin was purified from pig brain as described previously (Schlager *et al*, 2014; Urnavicius *et al*, 2015) and analysed by SDS-PAGE. Aliquots of the complex were flash-frozen in N<sub>2</sub> for storage at  $-80^\circ\text{C}$ .

### Preparation of mouse brain extracts

Following dissection, brains from 16 C57BL/6j-OlaHsd male mice strain were transferred to bijoux tubes containing solubilisation buffer (10 mM Hepes pH 7.3, 150 mM NaCl and 2 mM EDTA) on ice. Two brains were transferred to a pre-chilled 30-ml glass tube Wheaton homogenizer containing 5 ml of cold “solubilisation-plus” buffer (solubilisation buffer with 1× COMPLETE protease inhibitor and 1× PhosSTOP phosphatase inhibitor [Roche]). The brains were homogenised in a coldroom using an electric homogeniser with a Teflon arm (1,100–1,300 rpm and 10 strokes). An extra 1 ml of solubilisation-plus buffer was added to the tube, followed by addition of two more brains and further homogenisation (15 strokes) with the same speed. The lysate was then transferred to a pre-chilled 50-ml falcon tube and kept on ice. The same procedure was repeated three times, followed by pooling of lysates from the 16 brains, addition of Triton X-100 (0.1% [v/v] final concentration) and incubating on ice for 15 min. The lysate was then split into eight pre-chilled, thick-walled polycarbonate tubes (3.2 ml, Beckman Coulter) and centrifuged in an ultracentrifuge (Beckman Optima TLX) using a TLA110 pre-chilled rotor at 213,000 g for 20 min at 4°C. The supernatants were pooled in a 50-ml falcon tube on ice and then flash-frozen in N<sub>2</sub> in 500  $\mu$ l aliquots. Protein concentration of the extracts was  $\sim 10$  mg/ml.

### Pull-downs of dynein tail-associated proteins from brain extracts

#### Pull-downs using glutathione beads

Glutathione magnetic beads (Pierce) were washed twice with GST binding buffer (125 mM Tris-HCl pH 8.0, 150 mM NaCl, 0.05% Tween-20 and 1× COMPLETE protease inhibitor). 100 pmol (77 nM) of recombinant dynein tail complex or GST (Glutathione-S-transferase) only were incubated with 100  $\mu$ l glutathione magnetic beads in a total volume of 1,300  $\mu$ l GST binding buffer. The beads were washed three times with 2 ml of GST binding buffer and incubated with 500  $\mu$ l mouse brain extract (5 mg total protein) or 500  $\mu$ l mouse brain extract spiked with 50  $\mu$ g purified dynactin (41.67 pmol [48.45 nM]) in solubilisation-plus buffer for 2.5 h at 4°C with rotation. The beads were washed twice with 2 ml of Citomix buffer (60 mM KCl, 0.075 mM CaCl<sub>2</sub>, 5 mM K<sub>2</sub>HPO<sub>4</sub>/KH<sub>2</sub>PO<sub>4</sub> pH 7.6, 12.5 mM HEPES pH 7.6, 2.5 mM MgCl<sub>2</sub>, 0.1% [v/v] Triton X-100, 2 mM ATP, 1× COMPLETE protease inhibitor and 1× PhosSTOP phosphatase inhibitor), twice with 50 mM ammonium bicarbonate pH 8.0, and resuspended in 100  $\mu$ l of 50 mM ammonium bicarbonate pH 8.0. A 10- $\mu$ l aliquot from each sample was saved for downstream quality control with immunoblotting by adding 10  $\mu$ l 4× LDS buffer (Invitrogen) containing 200 mM DTT and incubating at 98°C for 15 min. The beads in these samples were magnetically separated for 10 min and the supernatant transferred

to a fresh 1.5-ml tube that was then frozen at  $-20^{\circ}\text{C}$ . The remaining 90  $\mu\text{l}$  of bead slurry for each sample was processed for liquid chromatography–tandem mass spectrometry (LC–MS/MS), as described below.

#### Pull-downs using IgG beads

IgG magnetic beads (Dynabeads M-280 Sheep  $\alpha$ -Rabbit IgG, Life Technologies) were washed twice with IgG binding buffer (1 $\times$  PBS, 0.05% [v/v] Tween-20 and 1 $\times$  COMPLETE protease inhibitor). 100 pmol (77 nM) of recombinant dynein tail complex or recombinant protein A (ThermoFisher Scientific) were incubated with 100  $\mu\text{l}$  IgG magnetic beads in 1,300  $\mu\text{l}$  IgG binding buffer with rotation for 1 h at  $4^{\circ}\text{C}$ . The beads were washed three times in IgG binding buffer and incubated with 500  $\mu\text{l}$  mouse brain extract (5 mg total protein) or 500  $\mu\text{l}$  mouse brain extract spiked with 50  $\mu\text{g}$  purified dynactin (41.67 pmol [48.45 nM]) in solubilisation-plus buffer for 2.5 h at  $4^{\circ}\text{C}$  with rotation. The samples were washed and prepared for immunoblot analysis and LC–MS/MS following the same procedure described above for glutathione beads.

#### LC–MS/MS

Proteins were digested on beads with 1  $\mu\text{g}$  trypsin (Promega) for 18 h at  $37^{\circ}\text{C}$ , followed by acidification of peptides with 2% (v/v) formic acid. The bead/peptide mix was then centrifuged at  $14,000 \times g$  for 5 min and the supernatant collected. The peptide fractions (7  $\mu\text{l}$  each) were analysed by nano-scale capillary LC–MS/MS with an Ultimate U3000 HPLC (ThermoScientific Dionex) with a 300 nl/min flow rate. Peptides were trapped in a C18 Acclaim PepMap 100  $\mu$ -precolumn cartridge (5  $\mu\text{m}$ , 300  $\mu\text{m} \times 5$  mm [ThermoScientific Dionex]) prior to separation on a C18 Acclaim PepMap 100 (3  $\mu\text{m}$ , 75  $\mu\text{m} \times 250$  mm [ThermoScientific Dionex]) and elution with a 90-min gradient of acetonitrile (from 5 to 40%). Using a modified nano-flow electrospray ionisation source, the analytical column outlet was directly interfaced with a hybrid linear quadrupole ion trap mass spectrometer (Orbitrap QExactive [ThermoScientific]). Data-dependent analysis was carried out with a resolution of 60,000 for the full MS spectrum (collected over a 200–1,800  $m/z$  range), followed by 10 MS/MS spectra in the linear ion trap (collected using 35-threshold energy for collision-induced dissociation).

#### Mass-spectrometry data processing and analysis

Raw mass-spectrometry data from pull-down samples were processed with MaxQuant software (versions 1.5.6.2; Tyanova et al, 2016a) using the built-in Andromeda engine to search against the UniprotKB mouse proteome (Mus musculus; release 2012\_02) containing forward and reverse sequences. The iBAQ algorithm and “Match Between Runs” option were additionally used. Carbamidomethylation was set as a fixed modification, and methionine oxidation and N-acetylation were set as variable modifications (using an initial mass tolerance of 6 ppm for the precursor ion and 0.5 Da for the fragment ions). For peptide and protein identifications, search results were filtered with a false discovery rate (FDR) of 0.01. Datasets were further processed with Perseus software (version 1.6.13.0; Tyanova et al, 2016b). Protein tables were filtered to eliminate identifications from the reverse database, as well as common contaminants. Only proteins identified on the basis of at least two peptides

and a minimum of three quantification events in at least one experimental group were taken forward. iBAQ intensity values were normalised against the median intensity of each sample (using only those peptides that had intensity values recorded across all samples and biological replicates), followed by  $\log_2$ -transformation and filling of missing values by imputation with random numbers drawn from a normal distribution calculated for each sample, as previously described (Neufeldt et al, 2019; Plaszczyca et al, 2019). Proteins that were statistically significantly enriched between pairs of datasets were identified with Welch’s *t*-tests with permutation-based false discovery rate statistics. Two-hundred-and-fifty permutations were performed with an FDR threshold set at 0.05. The parameter S0 was set at 0.1 in order to separate specifically enriched interactors from the background. Volcano plots of results were generated in Perseus. UniprotKB accession codes of all protein groups and proteins identified by mass spectrometry are provided in Datasets EV1–EV4.

#### Flp-In T-Rex cell line generation

HEK293 or HeLa Flp-In cells in wells of 6-well plates ( $8.5 \times 10^5$  cells/well) were transfected with 1  $\mu\text{g}$  plasmid DNA (pcDNA5 FRT/TO GFP-linker or pcDNA5 FRT/TO GFP-HR5B with pOG44 in a 1:1 or 2:1 ratio, respectively). The DNA was mixed with 200  $\mu\text{l}$  OptiMEM (Gibco) and 5  $\mu\text{l}$  1 mg/ml Polyethyleneimine (PEI) “MAX” MW 40,000 (Polysciences) in sterile phosphate-buffered saline (PBS). After vortexing, the mixture was incubated for 15 min at  $20^{\circ}\text{C}$  before adding to the cells in a drop-wise manner and gentle swirling of the plate. Cells were then incubated for 24 h at  $37^{\circ}\text{C}$  before removal of the media and splitting into a T25 flask containing 150  $\mu\text{g}/\text{ml}$  hygromycin B and 5  $\mu\text{g}/\text{ml}$  blasticidin (both from Gibco). The next day, and once every following week, the selective media was changed until single colonies appeared, which were detached with trypsin and pooled together for subsequent experimentation.

#### GFP-Trap immunoprecipitation from extracts

To induce expression of GFP or GFP-HR5B, HEK293 or HeLa Flp-In T-Rex GFP-linker or GFP-HR5B cell lines cells were cultured in the presence of 1  $\mu\text{g}/\text{ml}$  tetracycline for at least 48 h. Cells from three 15-cm dishes were harvested for each immunoprecipitation sample and lysed in 1.2 ml of ice-cold lysis buffer (10 mM Tris–HCl pH 7.4, 150 mM NaCl, 0.5 mM EDTA, 5% NP-40, 1 mM PMSF, 1 $\times$  COMPLETE protease inhibitors and 1 $\times$  PhosSTOP phosphatase inhibitors) for 30 min by pipetting extensively every 10 min. Lysates were transferred to pre-chilled thick polycarbonate tubes and centrifuged at  $39,000 \times g$  for 30 min in a TLA110 rotor using a Beckman Optima TLX ultracentrifuge. The supernatant was transferred to a pre-cooled 15-ml falcon tube, followed by addition of 1.5 volumes of ice-cold dilution buffer (10 mM Tris/HCl pH 7.4, 150 mM NaCl, 0.5 mM EDTA, 1 $\times$  COMPLETE protease inhibitor and 1 $\times$  PhosSTOP phosphatase inhibitor). The diluted supernatant was added to 60  $\mu\text{l}$  of equilibrated GFP-Trap<sup>®</sup>\_MA bead slurry (Chromotek) and the samples tumbled end-over-end for 4 h at  $4^{\circ}\text{C}$ . Beads were washed in 1 ml Citomix buffer (with mixing by pipetting up and down four times), transferred to fresh tubes and denatured with LDS/DTT as described above for pull-downs from mouse brain extracts.

### In vitro protein–protein interaction assay

For each sample, 25  $\mu$ l of GFP-Trap<sup>®</sup>\_MA bead slurry (Chromotek) was equilibrated with 1 ml of cold dilution buffer (DB: 10 mM Tris–HCl pH 7.4, 150 mM NaCl, 0.5 mM EDTA, 1 $\times$  COMPLETE protease inhibitors and 1 $\times$  PhosSTOP phosphatase inhibitors), followed by blocking of non-specific binding sites on the beads with 4% bovine serum albumen (BSA) in DB for 50 min at 4°C with end-over-end tumbling. Beads were washed twice in DB and transferred to fresh 1.5-ml tubes. Following removal of the supernatant, 80 pmol of purified GFP or GFP-HR5B in 0.5 ml of DB containing 2% NP-40 and 0.4 mM PMSF was mixed with the beads by end-over-end tumbling at 4°C for 2 h. Beads were washed three times in RIPA buffer (10 mM Tris–HCl pH 7.4, 150 mM NaCl, 0.5 mM EDTA, 0.1% SDS, 1% Triton X-100, 1 $\times$  COMPLETE protease inhibitors and 1 $\times$  PhosSTOP phosphatase inhibitors) and two times in protein binding buffer (PBB: 10 mM HEPES pH 7.6, 150 mM NaCl, 0.5 mM EDTA, 0.1% Triton X-100, 1% deoxycholate and 1 $\times$  COMPLETE protease inhibitors), followed by transfer to fresh tubes and removal of the supernatant. Dynein tail (20 pmol), dynactin (10 pmol) or dynein tail with dynactin (20 and 10 pmol, respectively) were incubated with the beads in 0.5 ml PBB for 2 h at 4°C with end-over-end tumbling. Subsequently, beads were washed twice in 1 ml RIPA buffer (with mixing by pipetting up and down four times), transferred to a fresh tube and processed for immunoblotting as described above. One third of the sample was loaded per gel lane, alongside 0.1  $\mu$ g of dynein tail or dynactin alone for molecular weight comparison.

### Immunoblotting

Proteins were separated on 4–12% NuPAGE Bis-Tris gels (ThermoFisher Scientific), with ECL Rainbow Full Range Marker (Cytiva) used for molecular weight standards. Following transfer to methanol-activated PDVF membrane (Immobilon P, Millipore) using the XCell II blot system (ThermoFisher Scientific), membranes were blocked with 5% (w/v) milk powder (Marvel) in PBS, and incubated with primary antibodies in 1% milk powder or 1% BSA in PBS overnight at 4°C. After washing with PBS/0.5% Tween-20 or PBS/1% Tween-20, membranes were incubated with secondary antibodies in 1% milk powder or 1% BSA in PBS for 1 h at room temperature. Details of primary and antibodies are provided below. Signals were developed using the ECL Prime system (Cytiva) and Super RX-N medical X-ray film (FUJIFILM). When loading samples for immunoprecipitation experiments, the volume of extract samples (input) was adjusted to give a clear, non-saturated signal (5  $\mu$ l for AP1 $\gamma$  and  $\gamma$ -SYNRG, 20  $\mu$ l for AFTPH, 2  $\mu$ l of a 1/20 dilution for DYNC1H1 and GFP, 20  $\mu$ l of a 1/20 dilution for GFP-HR5B, 8  $\mu$ l of a 1/20 dilution for DCTN1, and 4  $\mu$ l of a 1/20 dilution for GAPDH). For all immunoprecipitates, one third of the captured sample was loaded per gel lane.

### siRNA transfection

The *DYNC1H1* siRNA (ON-TARGET plus *DYNC1H1* L-006828-00-0005) and non-targeting control siRNA (ON-TARGET plus D-001810-10-05) pools were synthesised by Dharmacon and resuspended in 1 $\times$  siRNA buffer (Dharmacon).  $2.5 \times 10^4$  U2OS

cells/well were seeded in 24-well plates a day before transfection. 1.5  $\mu$ l Lipofectamine RNAiMax reagent (Invitrogen) was added to 50  $\mu$ l OptiMEM (Gibco) containing 25 nM siRNA and the mix incubated for 15–20 min at room temperature. This transfection mix was then added dropwise to the culture medium (450  $\mu$ l/well), which had been replaced 30 min earlier, and mixed by gently shaking the plate. Forty-eight hours after transfection, cells were washed with PBS and fixed with 4% paraformaldehyde (Sigma)/PBS for 20 min at room temperature. After three washes with PBS, cells were processed for immunofluorescence (see below).

### Transient transfection of human cells

U2OS cells were reverse transfected with pcDNA3.1-eGFP-HR5B (400 ng/well) or pcDNA3.1-GFP linker (200 ng/well), which was pre-mixed with 50  $\mu$ l OptiMEM and 1.25  $\mu$ l FuGene (Promega) for 15–20 min at room temperature. The transfection mix was added on coverslips, followed by addition of  $7 \times 10^4$  cells in 120  $\mu$ l complete DMEM and adjustment of the final volume to 500  $\mu$ l using additional complete DMEM. Twenty-four hours later, the transfection medium was removed and cells fixed in 4% PFA, washed in PBS and processed for immunofluorescence (see below).

### Generation of HEATR5B deficient U2OS cell lines

Negative control scrambled sgRNA (variable sequence: GCACUAC-CAGAGCUAACUCA) and *HEATR5B* +37079270 (reverse) sgRNA (variable sequence: GGAUUAAUAAGUAGUUCACC) (CRISPRrevolution; Synthego) were resuspended in nuclease-free 1 $\times$  TE buffer (10 mM Tris–HCl, 1 mM EDTA pH 8.0). U2OS cells were electroporated with ribonucleoprotein complexes containing sgRNA and Cas9 2NLS protein (Synthego) using the ThermoFisher Scientific Neon<sup>™</sup> transfection system according to the manufacturer's instructions ( $2.5 \times 10^5$  cells in 7  $\mu$ l buffer R [ThermoFisher Scientific] and 7  $\mu$ l sgRNA:Cas9 RNP mix [90 pmol:10 pmol]). Cells were then seeded in wells of a 6-well plate containing 4 ml pre-warmed complete DMEM. Six days later, limited dilution of cells in 96-well plates was performed to isolate single clones. Colonies of these clones were harvested by trypsin treatment and expanded for DNA extraction. The target region in the *HEATR5B* gene was amplified from genomic DNA according to Synthego's protocol and analysed by Sanger sequencing. Primers F-KO HEATR5B (TGG CTT TGG AGG AGC ATG AAG) and R-KO HEATR5B (ACT TCA AGG GCC CCT ATT AAA G) were used for PCR, with primer SP HEATR5B (GAG TGC CTT AAG TGT TAA GTG TTT) used for sequencing of the product. Indels were identified in sequencing chromatograms using the ICE application (Inference of CRISPR Edits; Synthego).

### Antibodies for immunoblotting and immunofluorescence of human cells

The following antibodies were used for immunoblotting (IB) and immunofluorescence (IF) of human cell extracts or cells, respectively (working dilutions in parentheses):  $\alpha$ -GFP chicken antibody (Abcam 13970; IB, 1:5,000; IF, 1:200),  $\alpha$ -DYNC1H1 rabbit antibody (Proteintech 12345-1-AP; IB, 1:100; IF, 1:100),  $\alpha$ -DCTN1 mouse antibody (BD Transduction Laboratories 610474; IB, 1:5,000; IF, 1:50),  $\alpha$ -AFTPH rabbit antibody (Invitrogen PA5-57104; IB,

1:500),  $\alpha$ - $\gamma$ -SYNRG (AP1GBP1) rabbit antibody (Novusbio NBP1-90145; IB, 1:200),  $\alpha$ -AP1 $\gamma$  (F-10) mouse antibody (Santa Cruz Sc-398867; IB, 1:100),  $\alpha$ -AP1 $\gamma$  mouse antibody (Sigma A4200, clone 100.3; IF, 1:400),  $\alpha$ -EEA1 mouse antibody (BD Transduction laboratories 610457; IF, 1:200),  $\alpha$ -LAMP1 mouse antibody (Abcam 25630; IF, 1:200),  $\alpha$ -GAPDH rabbit antibody (Sigma G9545; IB, 1:4,000),  $\alpha$ -HEATR5B rabbit antibody (Hirst *et al*, 2005; provided by J. Hirst and M. Robinson [Cambridge Institute for Medical Research, UK]; IB, 1:250),  $\alpha$ -TGN46 sheep antibody (Bio-Rad AHP500; IF, 1:200),  $\alpha$ -RAB11A rabbit monoclonal antibody (Abcam 128913; IF, 1:50),  $\alpha$ - $\beta$ -actin mouse antibody (Gen Tex GTX26276; IB, 1:20,000),  $\alpha$ - $\alpha$ -Tubulin mouse antibody (Santa Cruz; Sc-32293 clone DM1A; IF, 1:500), and  $\alpha$ -Transferrin receptor rabbit antibody (Abcam ab84036; IF, 1:200).

### Immunofluorescence of human cells

Control and *HEATR5B* mutant cells, GFP or GFP-*HEATR5B* transfected cells, or GFP and GFP-*HEATR5B* Flp-in cells (cultured in the presence of tetracycline for 72 h) were fixed with 4% PFA for 20 min at room temperature. After three washes with PBS, cells were permeabilised with 0.1% Triton X-100 in PBS for 10 min, blocked with either 10% FBS (Gibco) or 1% BSA in PBS for 30 min and incubated with primary antibodies in blocking solution (1% FBS/PBS or 1% BSA/PBS) for 1 h at room temperature. After washing twice with PBS, secondary antibodies (Alexa-conjugated IgG H+L series, ThermoFisher Scientific; 1:1,000 dilution) were incubated with cells for 1 h. Cells were washed twice more in PBS and incubated in 1  $\mu$ g/ml DAPI (Sigma) in PBS for 2 min to stain DNA, followed by two further PBS washes. Cells were washed once with autoclaved MilliQ water before mounting using ProLong Gold anti-fade mountant (ThermoFisher Scientific). Imaging was performed on a Zeiss 710 or 780 confocal microscope, with laser and acquisition settings kept constant within an experimental series.

### Live imaging of human cells and mean square displacement analysis

Cells were seeded on 35-mm Fluorodish dishes (Fisher Scientific) in 2 ml complete DMEM. An hour before imaging, cell medium was replaced with pre-warmed Leibovitz medium without phenol red (Gibco), which was supplemented with 20 mM HEPES and 10% FBS. For imaging of AP1 $\sigma$ 1-RFP or DsRed-RAB11A in GFP-*HR5B* cells, as well as AP1 $\sigma$ 1-RFP in control and *HR5B* KO cells,  $1 \times 10^5$  cells were seeded the day before transfection and cell culture medium replaced with 1.5 ml fresh medium (without tetracycline) 1 h before transfection. Cells were transfected with a transfection mix comprising 500 ng pAP1 $\sigma$ 1-RFP or 400 ng pDsRed-RAB11A WT in 250  $\mu$ l OptiMEM and 6.25  $\mu$ l PEI that had been pre-incubated at room temperature for 20 min before transfection. The transfection medium was replaced 6 h post transfection with fresh pre-warmed medium (containing tetracycline). Transfected cells showing low-to-medium expression of AP1 $\sigma$ 1-RFP or DsRed-RAB11A were filmed 24 h post transfection.

Movies of GFP-*HR5B* cells expressing DsRed-RAB11A were acquired using the 63  $\times$  1.4 NA Plan Apo oil objective of a PerkinElmer Ultraview ERS confocal spinning disk system built around an Olympus IX71 microscope equipped with an Orca ER camera (Hamamatsu). Data were acquired using sequential imaging of the

two channels (one pair of images captured every 1.3 s). Movies of GFP-*HR5B* cells expressing AP1 $\sigma$ 1-RFP were acquired on a custom spinning disk confocal microscopy system composed of a Nikon Ti stand equipped with perfect focus, a fast-piezo z-stage (ASI) and a 100 $\times$  NA 1.49 TIRF objective. Confocal illumination was achieved with a CSU-X1 spinning disk head (Yokogawa) and a Photometrics 95B back-illuminated sCMOS camera operating in global shutter mode and synchronised with the rotation of the spinning disk. Excitation was performed with 488-nm (150 mW OBIS LS) and 561-nm (100 mW OBIS LS) lasers fibered within a Cairn laser launch. To enable fast acquisition, hardware was synchronised by a Zynq-7020 Field Programmable Gate Array (FPGA) stand-alone card (National Instrument sbrio 9637) running custom code. Sample temperature was maintained at 37°C using a heating enclosure ([MicroscopeHeaters.com](http://MicroscopeHeaters.com)). The camera was configured in 12-bit dynamic range mode (gain 1) to maximise sensitivity, and a 600  $\times$  600 pixel region of interest selected to maximise acquisition speed. Sequential imaging of a single z-plane was performed with a total exposure time for both frames of 0.206 s. Absolute timestamps were recorded to ensure accurate tracking. Acquisition was controlled by Metamorph software (7.10.1.161).

High-speed imaging of AP1 $\sigma$ 1-RFP motility in human cells was performed using the Nikon Ti-based custom spinning disk confocal microscopy system described above, with the exception that the camera was operated in streaming mode with an effective frame-rate of 17.5 Hz (50 ms exposure plus  $\sim$ 7 ms read-out time). Particle tracking and analysis of these time series was performed in Fiji (Schindelin *et al*, 2012) and Matlab 2021b (Mathworks). AP1 $\sigma$ 1-RFP particles were automatically detected in a threshold-free manner by 2D gaussian fitting using the TwoTone TIRF-FRET matlab package (Holden *et al*, 2010). Trajectories were then automatically tracked using a MATLAB implementation by D. Blair and E. Dufresne of the IDL particle tracking code initially developed by D. Grier, J. Crocker and E. Weeks (<http://site.physics.georgetown.edu/matlab/index.html>). Since short tracks make MSD analysis inaccurate (Zahid *et al*, 2018), tracks that lasted for fewer than 10 time points were discarded. We also manually drew Regions of Interest (ROI) around cells and excluded all tracks corresponding to tracked objects that were not located in cells. For each track, the MATLAB class MSD Analyzer (Tarantino *et al*, 2014) was used to compute the Mean Square Displacement (MSD) of segments of increasing duration (delay time  $t$ ). The weighted mean MSD (Tarantino *et al*, 2014) across all tracks was then computed per delay time and plotted as a function of the delay time considered. AP1 $\sigma$ 1-RFP particle intensity upon *HR5B* disruption or as a function of track length was computed by integrating the area under the gaussian from the gaussian fitting data, followed by averaging of the values per track.

For co-localisation analysis of GFP-*HR5B* and AP1 $\sigma$ -RFP in live cells, the fluorescent signals were imaged sequentially on a single z-plane at high-speed (4.8 Hz). Particles within cells were detected by 2D gaussian fitting and tracked as above. We then evaluated the co-localisation state of each timepoint of each GFP-*HR5B* track using an object-based approach (Ben-Sasson *et al*, 2021). Briefly, a GFP-*HR5B* spot was considered co-localised if an AP1 $\sigma$ -RFP spot belonging to a track was found at a distance of  $< 300$  nm, which is approximately the resolution of the microscope. For each timepoint, the percentage of co-localisation was computed as the ratio between the number of co-localising GFP-*HR5B* tracks over the total number



of tracks multiplied by 100. This value was then averaged over the first 50 timepoints of each movie to limit the contribution of transient co-localisation events. We verified that this method yielded 100% co-localisation in controls with diffraction-limited beads that were fluorescent in both the GFP and RFP channels.

### Drosophila culture and preexisting strains

*Drosophila melanogaster* strains were cultured using “Iberian” food (5.5% [w/v] glucose, 3.5% [w/v] organic wheat flour, 5% [w/v] baker’s yeast, 0.75% [w/v] agar, 16.4 mM methyl-4-hydroxybenzoate [Nipagin] and 0.004% [v/v] propionic acid). Stocks and crosses were maintained in an environmentally controlled room set to  $25 \pm 1^\circ\text{C}$  and  $50 \pm 5\%$  relative humidity with a repeating 12 h-light/12 h-dark regime. The following previously generated strains were used in the study: *nos-Cas9<sup>ZH-2A</sup>* (Bloomington *Drosophila* Stock Center stock number: BL54591; Port et al, 2014), *Df(3R)BSC222* (BL9699; containing a genomic deficiency that includes the *Heatr5* locus); and *YFP-Rab11* (Dunst et al, 2015). Wild-type flies were of the *w<sup>1118</sup>* strain.

### Generation of *Drosophila* *Heatr5* mutant, GFP-*Heatr5B* and GFP-*Golgin-245* strains

Flies expressing a pair of gRNAs that target the 5′ region of the *Heatr5* gene (gRNAs 1+2; Appendix Fig S6) from the U6:3 promoter were generated using the pCFD4 plasmid, as described (Port et al, 2014) (see Appendix Table S4 for sequences of oligos used for gRNA cloning). Males expressing this transgene were crossed with *nos-Cas9<sup>ZH-2A</sup>* females (which express Cas9 specifically in the germline), with mutations identified in the offspring of the progeny by Sanger sequencing of PCR products derived from the targeted genomic region (Port & Bullock, 2016). The GFP-*Heatr5* expression construct was generated by restriction enzyme-mediated cloning of PCR-amplified eGFP and *Heatr5* coding sequences into a pCASPER-based plasmid that expresses proteins under the control of the ubiquitously active  $\alpha$ -tubulin84B promoter (Dienstbier et al, 2009). The *Heatr5* sequence was derived from the full-length cDNA clone GH08786 (*Drosophila* Genome Resource Center). Flies were transformed with this plasmid by P-element-mediated integration using standard procedures. The GFP-*Golgin-245* knock-in strain was generated by CRISPR/Cas9-mediated homology-directed repair (HDR), as described (Port et al, 2014; Port & Bullock, 2016). Briefly, embryos of *nos-Cas9<sup>ZH-2A</sup>* mothers were injected with a mixture of three plasmids: two pCFD3-gRNA plasmids targeting the *Golgin245* genomic sequences shown in Appendix Fig S9 (see Appendix Table S4 for oligo sequences used for cloning) and a pBlueScript-based donor plasmid (pBS-GFPG245) that has eGFP flanked by ~1-kb *Golgin245* homology arms. The final concentration of each plasmid in the injection mix was 100 ng/ $\mu\text{l}$  for each of pCFD3-gRNA plasmids and 150 ng/ $\mu\text{l}$  for pBS-GFPG245. Successful HDR was confirmed by PCR-based analysis of the progeny of the offspring of surviving embryos, as described (Port et al, 2014, 2015; Port & Bullock, 2016).

### CRISPR-based disruption of *Heatr5* in the *Drosophila* female germline

Mothers doubly heterozygous for *nos-Cas9<sup>ZH-2A</sup>* and one of two pCDF4 transgenes that express independent pairs of gRNAs

targeting *Heatr5* (gRNAs 1+2 or gRNAs 3+4; Appendix Figs S6A and S7A) were crossed with wild-type males and introduced into egg-laying cages mounted on plates of apple juice agar (1.66% [w/v] sucrose, 33.33% [v/v] apple juice, 3.33% [w/v] agar and 10.8 mM methyl-4-hydroxybenzoate). Embryos from this cross were collected in timed egg lays and processed for phenotypic analysis, as described below.

### Immunostaining and cuticle preparations of *Drosophila* embryos

For immunostaining, embryos were dechorionated, washed, fixed with a 4% formaldehyde/n-heptane mixture, and devitellinised using standard procedures. Washes were performed in PBS/0.1% Triton X-100 (PBST) and embryos blocked in 20% Western Blocking Buffer (Sigma) in PBST. The following primary antibodies were used:  $\alpha$ -*Drosophila* AP1 $\gamma$  rabbit antibody (Hirst et al, 2009; provided by J. Hirst and M. Robinson [Cambridge Institute for Medical Research, UK; 1:1,000 dilution]);  $\alpha$ -GFP chicken antibody (Abcam ab13970; 1:250 dilution);  $\alpha$ -*Drosophila* GM130 rabbit antibody (Abcam 30637; 1:1,000 dilution) and  $\alpha$ -*Drosophila* Golgin-84 mouse antibody (Riedel et al, 2016; provided by S. Munro [MRC-LMB, Cambridge, UK; 1:50 dilution]). Secondary antibodies were from the Alexa-conjugated IgG H+L series (ThermoFisher Scientific; 1:500 dilution). Samples were mounted in Vectashield containing DAPI (Vector Laboratories) and imaged with a Zeiss 780 laser-scanning confocal microscope. For cuticle preparations, 0–4 h egg collections were incubated for a further 28 h at  $25^\circ\text{C}$ . Unhatched embryos were then dechorionated, washed and mounted in lacto-hoyers solution before clearing by heating in an oven at  $65^\circ\text{C}$  for 16 h.

### Analysis of immunofluorescence signals in human cells and fly embryos

Quantification of spread of fluorescent signals away from the nucleus in U2OS cells was performed using a custom ImageJ script (available at [https://github.com/jboulanger/imagej-macro/tree/main/Cell\\_Organization](https://github.com/jboulanger/imagej-macro/tree/main/Cell_Organization)). The nuclear DAPI signal was segmented either using StartDist (Schmidt et al, 2018) or a median filter, followed by a rolling ball, a threshold controlled by a probability of false alarm, a watershed and the extraction of connected components. The signed euclidean distance transform was then computed for each region of interest, which allowed association of each pixel with the closest nucleus. Background pixels were discarded by segmenting the maximum projection intensity of all channels using a smoothing step and a threshold based on a quantile of the intensity distribution. Regions touching the border of the image were discarded to avoid analysis of incomplete cells. The signal of interest was segmented using a sharpening, a median filter, a rolling ball and finally a threshold controlled by a user defined false alarm rate. For each cell, the spread was computed as the sum of the squared deviation to the centroid weighted by the signal intensity in each segmented mask. The number and length of tubules in human cells was determined manually in ImageJ using the freehand selection tool. To quantify co-localisation of fluorescent puncta in HeLa cells, a custom ImageJ macro was produced (available at [https://github.com/jboulanger/imagej-macro/blob/main/Colocalization\\_Analysis/Colocalization\\_By\\_Cell.ijm](https://github.com/jboulanger/imagej-macro/blob/main/Colocalization_Analysis/Colocalization_By_Cell.ijm)). Briefly, cells were segmented using the same strategy as used for quantification of the spread of fluorescent



signals. The puncta were then segmented in each channel using a Laplacian of Gaussian filter and a threshold. For each cell, the overlapping puncta were counted and reported as a percentage of the total number of puncta in the first channel. ImageJ was also used for quantification of particle number and total particle intensity in human cells and fly embryos. The non-adjusted channel of interest was thresholded and segmented, followed by removal of particles smaller than five pixels. In mammalian cells, particle intensity and number of particles were measured per individual cell. In fly embryos, rectangular regions of  $300 \mu\text{m}^2$  were analysed in the apical cytoplasm, upper basal cytoplasm, lower basal cytoplasm and yolk; the upper basal and lower basal cytoplasmic regions were defined by the midpoint of the distance between the edge of the yolk and the basal side of the nuclei.

### Analysis of AP1 and mRNA motility in *Drosophila* embryos

Motility of AP1-positive structures was assessed with an affinity purified  $\alpha$ -*Drosophila* AP1 $\gamma$  rabbit antibody that is highly specific (Hirst et al, 2009). Fluorescent AP1 $\gamma$  antibody conjugates were generated by incubating 1  $\mu\text{l}$  of the  $\alpha$ -AP1 $\gamma$  antibody with 0.5  $\mu\text{l}$  of Alexa555-conjugated donkey  $\alpha$ -rabbit IgG (H+L) highly cross-adsorbed secondary antibody (ThermoFisher Scientific) and 3.5  $\mu\text{l}$  PBS at room temperature for 30 min. The antibody solution was then dialysed by dropping on a 0.025  $\mu\text{m}$ -pore filter MCE membrane (13 mm-diameter [Millipore]) that was floating on 25 ml of PBS, and incubating for 1 h. The drop was recovered and centrifuged briefly to remove any aggregates before loading into a laser-pulled borosilicate Microcap needle (Drummond). Primary antibodies conjugated to the secondary antibody as negative controls were: rabbit  $\alpha$ -HA (Sigma H6908) and rabbit  $\alpha$ -dinitrophenol (Invitrogen A6430). Alexa488-UTP-labelled *bcd* mRNA was generated by *in vitro* transcription as described (Bullock et al, 2006) and loaded into the injection needle at a concentration of 750 ng/ $\mu\text{l}$  in  $\text{dH}_2\text{O}$ .

Antibody and mRNA injections into embryos were performed at room temperature as described (Bullock et al, 2006) using a micro-manipulator fitted to an Ultraview ERS spinning disk imaging system (PerkinElmer). Time-lapse images were acquired at 1 frame/s (AP1 $\gamma$  antibody conjugates) or 2 frame/s (*bcd* mRNA) using a 60 $\times$ /1.2 NA UPlanApo water objective and an OrcaER camera (Hamamatsu). Centroid-based automatic tracking of fluorescent antibody and mRNA particles in the cytoplasm and quantification of their movements was performed using a custom script written in Mathematica (Wolfram) by A. Nicol and D. Zicha (Bullock et al, 2006). To assess the contribution of microtubules to motility of AP1-positive puncta, wild-type embryos were injected with a 20 ng/ $\mu\text{l}$  solution of colcemid 2 min prior to injection of the fluorescent AP1 $\gamma$  antibody conjugate. After imaging the antibody signal for  $\sim$ 10 min, colcemid was inactivated by a 10 s exposure to UV light through the mercury lamp attached to the microscope, with filming resumed 60 s afterwards. To determine the role of dynein in transport of AP1 positive structures, embryos were preinjected 2 min before AP1 $\gamma$  antibody conjugate injection with a 1  $\mu\text{g}/\mu\text{l}$  solution of mouse  $\alpha$ -Dic antibody (clone 74.1; Millipore) or a 1  $\mu\text{g}/\mu\text{l}$  solution of mouse  $\alpha$ -GFP antibody (mixture of clones 7.1 and 13.1; Sigma) as a control. These antibodies were dialysed before use, as described above. Multiple injection sessions were performed for each experiment to confirm the consistency of results. When assessing the effects of

mutating *Heatr5*, the control and mutant embryo injections were interleaved within each imaging session.

To visualise both Golgin-245 and AP1, blastoderm embryos from GFP-Golgin-245 homozygous mothers were injected with Alexa555-labelled AP1 $\gamma$  antibody conjugates as described above. To maximise the intensity of the relatively dim GFP-Golgin-245 signal, the focal plane was set closer to the surface of the embryo than for AP1 $\gamma$  or mRNA tracking. This meant that it was typically not possible to follow transported AP1 $\gamma$  puncta all the way from the yolk to the upper basal cytoplasm. In these experiments, images were subjected to  $2 \times 2$  binning, with sequential imaging of the two channels (exposure times of 500 ms for the AP1 $\gamma$  signal and 1 s for the GFP-Golgin-245 signal).

### Immunoblotting of *Drosophila* embryo extracts

*Drosophila* embryo extracts were generated for immunoblotting as described (McClintock et al, 2018), with a Coomassie (Bradford) Protein Assay (ThermoFisher Scientific) used to ensure that the amount of total protein loaded per gel lane was equivalent between genotypes. Electrophoresis and immunoblotting were performed as described above using  $\alpha$ -*Drosophila* AP1 $\gamma$  rabbit antibodies (see above; 1:5,000 dilution) and  $\alpha$ - $\beta$ -actin rabbit antibodies (Abcam 8224; 1:10,000 dilution).

### Statistical analysis, data plotting and experimental design

Statistical evaluations and plots were made with Prism (version 9; GraphPad) or Perseus. Appropriate statistical tests were selected based on confirmed or assumed data distributions (Gaussian or non-Gaussian), variance (equal or unequal), sample size and number of comparisons (pairwise or multiple). Details of sample sizes and types of tests are included in the figure legends. Individual data points are shown in plots, except when  $N > 40$  (when box and whisker plots are used). The investigators analysing the data were not blind to the identity of the samples.

## Data availability

The mass spectrometry-based proteomics data has been deposited at the ProteomeXchange Consortium (<http://proteomecentral.proteomexchange.org>) via the PRIDE partner repository with the dataset identifier PXD043387 (<http://www.ebi.ac.uk/pride/archive/projects/PXD043387>).

**Expanded View** for this article is available [online](#).

### Acknowledgements

We are very grateful to David Paul, Jennifer Hirst, Harvey McMahon, Alfredo Castello, Elena Dobrikova, Matthias Gromeier, Eeson Rajendra, Alice Bittleston, Sabine Thomas, Andrew Carter and members of the Bullock and Carter groups (in particular Mark McClintock and Sami Chaaban) at MRC-LMB for discussions, advice, assistance or reagents, Daniel Zicha for help with analysis of particle tracks in *Drosophila* embryos, Mark Skehel and Catarina Franco (LMB Mass Spectrometry Facility) for help with processing mass spectrometry data, Jo Westmoreland, Graham Lingley, Elfy Chiang and Shraddha Nayak (LMB Visual Aids) for help with artwork and editing movies, and Sean Munro and Margaret Robinson for reagents, advice and comments on the manuscript. This work was

supported by the UK Medical Research Council (file reference numbers MC\_U105178790 [to SLB], MC\_UP\_1201/13 [to ED] and MC\_U105178783 [for support of NM; award to Sean Munro]), as well as the Human Frontier Science Program (Career Development Award CDA00034/2017-C to ED). Work in the group of PS is supported by the Free and Hanseatic City of Hamburg and the Bundesministerium für Bildung und Forschung (project VirMScan). Work in the group of MAK is supported by the Deutsche Forschungsgemeinschaft (Ki 502/9-1, 506658941), as well as WifoMed and the Friedrich Baur Stiftung (awards to KB). For the purpose of open access, the MRC Laboratory of Molecular Biology has applied a CC-BY public copyright licence to any Author Accepted Manuscript version arising.

## Author contributions

**Vanessa Madan:** Conceptualization; formal analysis; supervision; investigation; methodology; writing – original draft; writing – review and editing. **Lucas Albacete-Albacete:** Formal analysis; validation; investigation; methodology; writing – review and editing. **Li Jin:** Formal analysis; validation; investigation; methodology; writing – review and editing. **Pietro Scaturro:** Formal analysis; methodology; writing – review and editing. **Joseph L Watson:** Investigation; methodology; writing – review and editing. **Nadine Muschalik:** Resources; investigation; writing – review and editing. **Farida Begum:** Formal analysis; writing – review and editing. **Jérôme Boulanger:** Software; formal analysis; writing – review and editing. **Karl Bauer:** Investigation; writing – review and editing. **Michael A Kiebler:** Supervision; funding acquisition; writing – review and editing. **Emmanuel Derivery:** Software; formal analysis; supervision; funding acquisition; writing – review and editing. **Simon L Bullock:** Conceptualization; supervision; funding acquisition; validation; investigation; writing – original draft; project administration; writing – review and editing.

## Disclosure and competing interests statement

The authors declare that they have no conflict of interest.

## References

- Andrade MA, Bork P (1995) HEAT repeats in the Huntington's disease protein. *Nat Genet* 11: 115–116
- Ben-Sasson AJ, Watson JL, Sheffler W, Camp Johnson N, Bittleston A, Somasundaram L, Decarreau J, Jiao F, Chen J, Mela I et al (2021) Design of biologically active binary protein 2D materials. *Nature* 589: 468–473
- Brinkley BR (1985) Microtubule organizing centers. *Annu Rev Cell Biol* 1: 145–172
- Bullock SL, Ish-Horowitz D (2001) Conserved signals and machinery for RNA transport in *Drosophila* oogenesis and embryogenesis. *Nature* 414: 611–616
- Bullock SL, Nicol A, Gross SP, Zicha D (2006) Guidance of bidirectional motor complexes by mRNA cargoes through control of dynein number and activity. *Curr Biol* 16: 1447–1452
- Burkhardt JK, Echeverri CJ, Nilsson T, Vallee RB (1997) Overexpression of the dynamitin (p50) subunit of the dynactin complex disrupts dynein-dependent maintenance of membrane organelle distribution. *J Cell Biol* 139: 469–484
- Cancino J, Torrealba C, Soza A, Yuseff MI, Gravotta D, Henklein P, Rodriguez-Boulan E, Gonzalez A (2007) Antibody to AP1B adaptor blocks biosynthetic and recycling routes of basolateral proteins at recycling endosomes. *Mol Biol Cell* 18: 4872–4884
- Czaban BB, Forer A (1985) The kinetic polarities of spindle microtubules *in vivo*, in crane-fly spermatocytes. II. Kinetochore microtubules in non-treated spindles. *J Cell Sci* 79: 39–65
- Dienstbier M, Boehl F, Li X, Bullock SL (2009) Egalitarian is a selective RNA-binding protein linking mRNA localization signals to the dynein motor. *Genes Dev* 23: 1546–1558
- Donaldson JG, Finazzi D, Klausner RD (1992) Brefeldin A inhibits Golgi membrane-catalysed exchange of guanine nucleotide onto ARF protein. *Nature* 360: 350–352
- Driskell OJ, Mironov A, Allan VJ, Woodman PG (2007) Dynein is required for receptor sorting and the morphogenesis of early endosomes. *Nat Cell Biol* 9: 113–120
- Dunst S, Kazimiers T, von Zadow F, Jambor H, Sagner A, Brankatschk B, Mahmoud A, Spann S, Tomancak P, Eaton S et al (2015) Endogenously tagged Rab proteins: a resource to study membrane trafficking in *Drosophila*. *Dev Cell* 33: 351–365
- Fernandez GE, Payne GS (2006) Laa1p, a conserved AP-1 accessory protein important for AP-1 localization in yeast. *Mol Biol Cell* 17: 3304–3317
- Flores-Rodriguez N, Rogers SS, Kenwright DA, Waigh TA, Woodman PG, Allan VJ (2011) Roles of dynein and dynactin in early endosome dynamics revealed using automated tracking and global analysis. *PLoS One* 6: e24479
- Fujii S, Kurokawa K, Inaba R, Hiramatsu N, Tago T, Nakamura Y, Nakano A, Satoh T, Satoh AK (2020a) Recycling endosomes attach to the trans-side of Golgi stacks in *Drosophila* and mammalian cells. *J Cell Sci* 133: jcs236935
- Fujii S, Kurokawa K, Tago T, Inaba R, Takiguchi A, Nakano A, Satoh T, Satoh AK (2020b) Sec71 separates Golgi stacks in *Drosophila* S2 cells. *J Cell Sci* 133: jcs245571
- Gershoni-Emek N, Mazza A, Chein M, Gradus-Pery T, Xiang X, Li KW, Sharan R, Perlson E (2016) Proteomic analysis of dynein-interacting proteins in amyotrophic lateral sclerosis synaptosomes reveals alterations in the RNA-binding protein Staufen1. *Mol Cell Proteomics* 15: 506–522
- Ghosh SG, Breuss MW, Schlachetzki Z, Chai G, Ross D, Stanley V, Sonmez FM, Topaloglu H, Zaki MS, Hosny H et al (2021) Biallelic hypomorphic mutations in HEATR5B, encoding HEAT repeat-containing protein 5B, in a neurological syndrome with pontocerebellar hypoplasia. *Eur J Hum Genet* 29: 957–964
- Gillard G, Shafaq-Zadah M, Nicolle O, Damaj R, Pecreaux J, Michaux G (2015) Control of E-cadherin apical localisation and morphogenesis by a SOAP-1/AP-1/clathrin pathway in *C. elegans* epidermal cells. *Development* 142: 1684–1694
- Goudreault M, D'Ambrosio LM, Kean MJ, Mullin MJ, Larsen BG, Sanchez A, Chaudhry S, Chen GI, Sicheri F, Nesvizhskii AI et al (2009) A PP2A phosphatase high density interaction network identifies a novel striatin-interacting phosphatase and kinase complex linked to the cerebral cavernous malformation 3 (CCM3) protein. *Mol Cell Proteomics* 8: 157–171
- Grinthal A, Adamovic I, Weiner B, Karplus M, Kleckner N (2010) PR65, the HEAT-repeat scaffold of phosphatase PP2A, is an elastic connector that links force and catalysis. *Proc Natl Acad Sci USA* 107: 2467–2472
- Grotjahn DA, Chowdhury S, Xu Y, McKenney RJ, Schroer TA, Lander GC (2018) Cryo-electron tomography reveals that dynactin recruits a team of dyneins for processive motility. *Nat Struct Mol Biol* 25: 203–207
- Groves MR, Hanlon N, Turowski P, Hemmings BA, Barford D (1999) The structure of the protein phosphatase 2A PR65/A subunit reveals the conformation of its 15 tandemly repeated HEAT motifs. *Cell* 96: 99–110
- Guo X, Farias GG, Mattered R, Bonifacio JS (2016) Rab5 and its effector FHF contribute to neuronal polarity through dynein-dependent retrieval of somatodendritic proteins from the axon. *Proc Natl Acad Sci USA* 113: E5318–E5327
- Helms JB, Rothman JE (1992) Inhibition by brefeldin A of a Golgi membrane enzyme that catalyses exchange of guanine nucleotide bound to ARF. *Nature* 360: 352–354

- Hinckelmann MV, Virlogeux A, Niehage C, Poujol C, Choquet D, Hoflack B, Zala D, Saudou F (2016) Self-propelling vesicles define glycolysis as the minimal energy machinery for neuronal transport. *Nat Commun* 7: 13233
- Hirst J, Borner GH, Harbour M, Robinson MS (2005) The aftiphilin/p200/gamma-synergin complex. *Mol Biol Cell* 16: 2554–2565
- Hirst J, Sahlender DA, Choma M, Sinka R, Harbour ME, Parkinson M, Robinson MS (2009) Spatial and functional relationship of GGAs and AP-1 in *Drosophila* and HeLa cells. *Traffic* 10: 1696–1710
- Hirst J, Borner GH, Antrobus R, Peden AA, Hodson NA, Sahlender DA, Robinson MS (2012) Distinct and overlapping roles for AP-1 and GGAs revealed by the “knocksideways” system. *Curr Biol* 22: 1711–1716
- Holden SJ, Uphoff S, Hohlbein J, Yadin D, Le Reste L, Britton OJ, Kapanidis AN (2010) Defining the limits of single-molecule FRET resolution in TIRF microscopy. *Biophys J* 99: 3102–3111
- Hong Z, Yang Y, Zhang C, Niu Y, Li K, Zhao X, Liu JJ (2009) The retromer component SNX6 interacts with dynactin p150(Glued) and mediates endosome-to-TGN transport. *Cell Res* 19: 1334–1349
- Hoogenraad CC, Akhmanova A (2016) Bicaudal D family of motor adaptors: linking dynein motility to cargo binding. *Trends Cell Biol* 26: 327–340
- Horgan CP, Hanscom SR, Jolly RS, Futter CE, McCaffrey MW (2010) Rab11-FIP3 links the Rab11 GTPase and cytoplasmic dynein to mediate transport to the endosomal-recycling compartment. *J Cell Sci* 123: 181–191
- Htet ZM, Gillies JP, Baker RW, Leschziner AE, DeSantis ME, Reck-Peterson SL (2020) LIS1 promotes the formation of activated cytoplasmic dynein-1 complexes. *Nat Cell Biol* 22: 518–525
- Jolly AL, Gelfand VI (2011) Bidirectional intracellular transport: utility and mechanism. *Biochem Soc Trans* 39: 1126–1130
- Jongsma MLM, Bakker N, Neeffes J (2023) Choreographing the motor-driven endosomal dance. *J Cell Sci* 136: jcs259689
- Jordens I, Fernandez-Borja M, Marsman M, Dusseljee S, Janssen L, Calafat J, Janssen H, Wubbolts R, Neeffes J (2001) The Rab7 effector protein RILP controls lysosomal transport by inducing the recruitment of dynein-dynactin motors. *Curr Biol* 11: 1680–1685
- Kaiser C, Dobrikova EY, Bradrick SS, Shveygert M, Herbert JT, Gromeier M (2008) Activation of cap-independent translation by variant eukaryotic initiation factor 4G *in vivo*. *RNA* 14: 2170–2182
- Karr TL, Alberts BM (1986) Organization of the cytoskeleton in early *Drosophila* embryos. *J Cell Biol* 102: 1494–1509
- Klumperman J, Raposo G (2014) The complex ultrastructure of the endolysosomal system. *Cold Spring Harb Perspect Biol* 6: a016857
- Kondylis V, Rabouille C (2009) The Golgi apparatus: lessons from *Drosophila*. *FEBS Lett* 583: 3827–3838
- Kuck U, Radchenko D, Teichert I (2019) STRIPAK, a highly conserved signaling complex, controls multiple eukaryotic cellular and developmental processes and is linked with human diseases. *Biol Chem* 400: 1005–1022
- Lalli G, Gschmeissner S, Schiavo G (2003) Myosin Va and microtubule-based motors are required for fast axonal retrograde transport of tetanus toxin in motor neurons. *J Cell Sci* 116: 4639–4650
- Le Bras S, Rondanino C, Kriegel-Taki G, Dussert A, Le Borgne R (2012) Genetic identification of intracellular trafficking regulators involved in Notch-dependent binary cell fate acquisition following asymmetric cell division. *J Cell Sci* 125: 4886–4901
- Lee IG, Olenick MA, Boczkowska M, Franzini-Armstrong C, Holzbaur ELF, Dominguez R (2018) A conserved interaction of the dynein light intermediate chain with dynein-dynactin effectors necessary for processivity. *Nat Commun* 9: 986
- Liu N, Liu K, Yang C (2022) WDR91 specifies the endosomal retrieval subdomain for retromer-dependent recycling. *J Cell Biol* 221: e202203013
- Lorenzo DN, Badea A, Davis J, Hostettler J, He J, Zhong G, Zhuang X, Bennett V (2014) A PIK3C3-ankyrin-B-dynactin pathway promotes axonal growth and multiorganelle transport. *J Cell Biol* 207: 735–752
- Loubery S, Wilhelm C, Hurbain I, Neveu S, Louvard D, Coudrier E (2008) Different microtubule motors move early and late endocytic compartments. *Traffic* 9: 492–509
- Lui WW, Collins BM, Hirst J, Motley A, Millar C, Schu P, Owen DJ, Robinson MS (2003) Binding partners for the COOH-terminal appendage domains of the GGAs and gamma-adaptin. *Mol Biol Cell* 14: 2385–2398
- McClintock MA, Dix CI, Johnson CM, McLaughlin SH, Maizels RJ, Hoang HT, Bullock SL (2018) RNA-directed activation of cytoplasmic dynein-1 in reconstituted transport RNPs. *Elife* 7: e36312
- McKenney RJ, Huynh W, Tanenbaum ME, Bhabha G, Vale RD (2014) Activation of cytoplasmic dynein motility by dynactin-cargo adapter complexes. *Science* 345: 337–341
- Miura M, Matsubara A, Kobayashi T, Edamatsu M, Toyoshima YY (2010) Nucleotide-dependent behavior of single molecules of cytoplasmic dynein on microtubules *in vitro*. *FEBS Lett* 584: 2351–2355
- Mofatteh M, Bullock SL (2017) SnapShot: subcellular mRNA localization. *Cell* 169: 178
- Moussian B, Veerkamp J, Muller U, Schwarz H (2007) Assembly of the *Drosophila* larval exoskeleton requires controlled secretion and shaping of the apical plasma membrane. *Matrix Biol* 26: 337–347
- Munro S (2011) The golgin coiled-coil proteins of the Golgi apparatus. *Cold Spring Harb Perspect Biol* 3: a005256
- Nakagawa T, Setou M, Seog D, Ogasawara K, Dohmae N, Takio K, Hirokawa N (2000) A novel motor, KIF13A, transports mannose-6-phosphate receptor to plasma membrane through direct interaction with AP-1 complex. *Cell* 103: 569–581
- Nakatsu F, Hase K, Ohno H (2014) The role of the clathrin adaptor AP-1: polarized sorting and beyond. *Membranes* 4: 747–763
- Nakayama K, Wakatsuki S (2003) The structure and function of GGAs, the traffic controllers at the TGN sorting crossroads. *Cell Struct Funct* 28: 431–442
- Neisch AL, Neufeld TP, Hays TS (2017) A STRIPAK complex mediates axonal transport of autophagosomes and dense core vesicles through PP2A regulation. *J Cell Biol* 216: 441–461
- Neufeldt CJ, Cortese M, Scaturro P, Cerikan B, Wideman JG, Tabata K, Moraes T, Oleksiuk O, Pichlmair A, Bartenschlager R (2019) ER-shaping atlastin proteins act as central hubs to promote flavivirus replication and virion assembly. *Nat Microbiol* 4: 2416–2429
- Olenick MA, Holzbaur ELF (2019) Dynein activators and adaptors at a glance. *J Cell Sci* 132: 227132
- Papoulas O, Hays TS, Sisson JC (2005) The golgin Lava lamp mediates dynein-based Golgi movements during *Drosophila* cellularization. *Nat Cell Biol* 7: 612–618
- Pelissier A, Chauvin JP, Lecuit T (2003) Trafficking through Rab11 endosomes is required for cellularization during *Drosophila* embryogenesis. *Curr Biol* 13: 1848–1857
- Plaszczycza A, Scaturro P, Neufeldt CJ, Cortese M, Cerikan B, Ferla S, Brancale A, Pichlmair A, Bartenschlager R (2019) A novel interaction between dengue virus nonstructural protein 1 and the NS4A-2K-4B precursor is required for viral RNA replication but not for formation of the membranous replication organelle. *PLoS Pathog* 15: e1007736
- Port F, Bullock SL (2016) Creating heritable mutations in *Drosophila* with CRISPR-Cas9. *Methods Mol Biol* 1478: 145–160
- Port F, Chen HM, Lee T, Bullock SL (2014) Optimized CRISPR/Cas tools for efficient germline and somatic genome engineering in *Drosophila*. *Proc Natl Acad Sci USA* 111: E2967–E2976

- Port F, Muschalik N, Bullock SL (2015) Systematic evaluation of *Drosophila* CRISPR tools reveals safe and robust alternatives to autonomous gene drives in basic research. *Genetics* 193: 1493–1502
- Reck-Peterson SL, Redwine WB, Vale RD, Carter AP (2018) The cytoplasmic dynein transport machinery and its many cargoes. *Nat Rev Mol Cell Biol* 19: 382–398
- Redwine WB, DeSantis ME, Hollyer I, Htet ZM, Tran PT, Swanson SK, Florens L, Washburn MP, Reck-Peterson SL (2017) The human cytoplasmic dynein interactome reveals novel activators of motility. *Elife* 6: e28257
- Riedel F, Gillingham AK, Rosa-Ferreira C, Galindo A, Munro S (2016) An antibody toolkit for the study of membrane traffic in *Drosophila melanogaster*. *Biol Open* 5: 987–992
- Robinson MS, Sahlender DA, Foster SD (2010) Rapid inactivation of proteins by rapamycin-induced rerouting to mitochondria. *Dev Cell* 18: 324–331
- Sakuma C, Kawauchi T, Haraguchi S, Shikanai M, Yamaguchi Y, Gelfand VI, Luo L, Miura M, Chihara T (2014) *Drosophila* Strip serves as a platform for early endosome organization during axon elongation. *Nat Commun* 5: 5180
- Samavarchi-Tehrani P, Samson R, Gingras AC (2020) Proximity dependent biotinylation: key enzymes and adaptation to proteomics approaches. *Mol Cell Proteomics* 19: 757–773
- Sanger A, Hirst J, Davies AK, Robinson MS (2019) Adaptor protein complexes and disease at a glance. *J Cell Sci* 132: 222992
- Schindelin J, Arganda-Carreras I, Frise E, Kaynig V, Longair M, Pietzsch T, Preibisch S, Rueden C, Saalfeld S, Schmid B et al (2012) Fiji: an open-source platform for biological-image analysis. *Nat Methods* 9: 676–682
- Schlager MA, Hoang HT, Urnavicius L, Bullock SL, Carter AP (2014) *In vitro* reconstitution of a highly processive recombinant human dynein complex. *EMBO J* 33: 1855–1868
- Schmidt H, Carter AP (2016) Structure and mechanism of the dynein motor ATPase. *Biopolymers* 105: 557–567
- Schmidt MR, Maritzen T, Kukhtina V, Higman VA, Doglio L, Barak NN, Strauss H, Oschkinat H, Dotti CG, Haucke V (2009) Regulation of endosomal membrane traffic by a GADKIN/AP-1/kinesin KIF5 complex. *Proc Natl Acad Sci USA* 106: 15344–15349
- Schmidt U, Weigert M, Broaddus C, Myers G (2018) Cell detection with star-convex polygons. In *Medical Image Computing and Computer Assisted Intervention - MICCAI 2018*, Frangi AF, Schnabel JA, Davatzikos C, Alberola-Lopez C, Fichtinger G (eds), pp 265–273. Cham: Springer
- Schroeder CM, Ostrem JM, Hertz NT, Vale RD (2014) A Ras-like domain in the light intermediate chain bridges the dynein motor to a cargo-binding region. *Elife* 3: e03351
- Schulze KL, Bellen HJ (1996) *Drosophila* syntaxin is required for cell viability and may function in membrane formation and stabilization. *Genetics* 144: 1713–1724
- Shubeita GT, Tran SL, Xu J, Vershinin M, Cermelli S, Cotton SL, Welte MA, Gross SP (2008) Consequences of motor copy number on the intracellular transport of kinesin-1-driven lipid droplets. *Cell* 135: 1098–1107
- Sisson JC, Field C, Ventura R, Royou A, Sullivan W (2000) Lava lamp, a novel peripheral golgi protein, is required for *Drosophila melanogaster* cellularization. *J Cell Biol* 151: 905–918
- Snee MJ, Arn EA, Bullock SL, Macdonald PM (2005) Recognition of the *bcd* mRNA localization signal in *Drosophila* embryos and ovaries. *Mol Cell Biol* 25: 1501–1510
- Snyder AJ, Abad AT, Danthi P (2022) A CRISPR-Cas9 screen reveals a role for WD repeat-containing protein 81 (WDR81) in the entry of late penetrating viruses. *PLoS Pathog* 18: e1010398
- Splinter D, Razafsky DS, Schlager MA, Serra-Marques A, Grigoriev I, Demmers J, Keijzer N, Jiang K, Poser I, Hyman AA et al (2012) BICD2, dynactin, and LIS1 cooperate in regulating dynein recruitment to cellular structures. *Mol Biol Cell* 23: 4226–4241
- Tarantino N, Tinevez JY, Crowell EF, Boisson B, Henriques R, Mhlanga M, Agou F, Israel A, Laplantine E (2014) TNF and IL-1 exhibit distinct ubiquitin requirements for inducing NEMO-IKK supramolecular structures. *J Cell Biol* 204: 231–245
- Tirumala NA, Redpath G, Skerhut SVPD, Kapoor-Kaushik NNA, Vijay Kumar K, Ananthanarayanan V (2022) Single-molecule imaging of cytoplasmic dynein in cellulose reveals the mechanism of motor activation and cargo movement. *bioRxiv* <https://doi.org/10.1101/2021.04.05.438428> [PREPRINT]
- Traer CJ, Rutherford AC, Palmer KJ, Wassmer T, Oakley J, Attar N, Carlton JG, Kremerskothen J, Stephens DJ, Cullen PJ (2007) SNX4 coordinates endosomal sorting of TfnR with dynein-mediated transport into the endocytic recycling compartment. *Nat Cell Biol* 9: 1370–1380
- Trocter M, Mucke N, Surrey T (2012) Reconstitution of the human cytoplasmic dynein complex. *Proc Natl Acad Sci USA* 109: 20895–20900
- Tyanova S, Temu T, Cox J (2016a) The MaxQuant computational platform for mass spectrometry-based shotgun proteomics. *Nat Protoc* 11: 2301–2319
- Tyanova S, Temu T, Sinitcyn P, Carlson A, Hein MY, Geiger T, Mann M, Cox J (2016b) The Perseus computational platform for comprehensive analysis of (prote)omics data. *Nat Methods* 13: 731–740
- Urnavicius L, Zhang K, Diamant AG, Motz C, Schlager MA, Yu M, Patel NA, Robinson CV, Carter AP (2015) The structure of the dynactin complex and its interaction with dynein. *Science* 347: 1441–1446
- Urnavicius L, Lau CK, Elshenawy MM, Morales-Rios E, Motz C, Yildiz A, Carter AP (2018) Cryo-EM shows how dynactin recruits two dyneins for faster movement. *Nature* 554: 202–206
- Warn RM, Warn A (1986) Microtubule arrays present during the syncytial and cellular blastoderm stages of the early *Drosophila* embryo. *Exp Cell Res* 163: 201–210
- Wilkie GS, Davis I (2001) *Drosophila wingless* and pair-rule transcripts localize apically by dynein-mediated transport of RNA particles. *Cell* 105: 209–219
- Xing R, Zhou H, Jian Y, Li L, Wang M, Liu N, Yin Q, Liang Z, Guo W, Yang C (2021) The Rab7 effector WDR91 promotes autophagy-lysosome degradation in neurons by regulating lysosome fusion. *J Cell Biol* 220: e202007061
- Yoshimura SH, Hirano T (2016) HEAT repeats - versatile arrays of amphiphilic helices working in crowded environments? *J Cell Sci* 129: 3963–3970
- Zahid MU, Ma L, Lim SJ, Smith AM (2018) Single quantum dot tracking reveals the impact of nanoparticle surface on intracellular state. *Nat Commun* 9: 1830
- Zajac AL, Goldman YE, Holzbaur EL, Ostap EM (2013) Local cytoskeletal and organelle interactions impact molecular-motor-driven early endosomal trafficking. *Curr Biol* 23: 1173–1180
- Zhang K, Foster HE, Rondelet A, Lacey SE, Bahi-Buisson N, Bird AW, Carter AP (2017) Cryo-EM reveals how human cytoplasmic dynein is auto-inhibited and activated. *Cell* 169: 1303–1314
- Zysnarski CJ, Lahiri S, Javed FT, Martinez-Marquez JY, Trowbridge JW, Duncan MC (2019) Adaptor protein complex-1 (AP-1) is recruited by the HEATR5 protein Laa1 and its co-factor Laa2 in yeast. *J Biol Chem* 294: 1410–1419

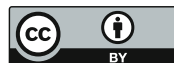

**License:** This is an open access article under the terms of the [Creative Commons Attribution](https://creativecommons.org/licenses/by/4.0/) License, which permits use, distribution and reproduction in any medium, provided the original work is properly cited.



## Expanded View Figures

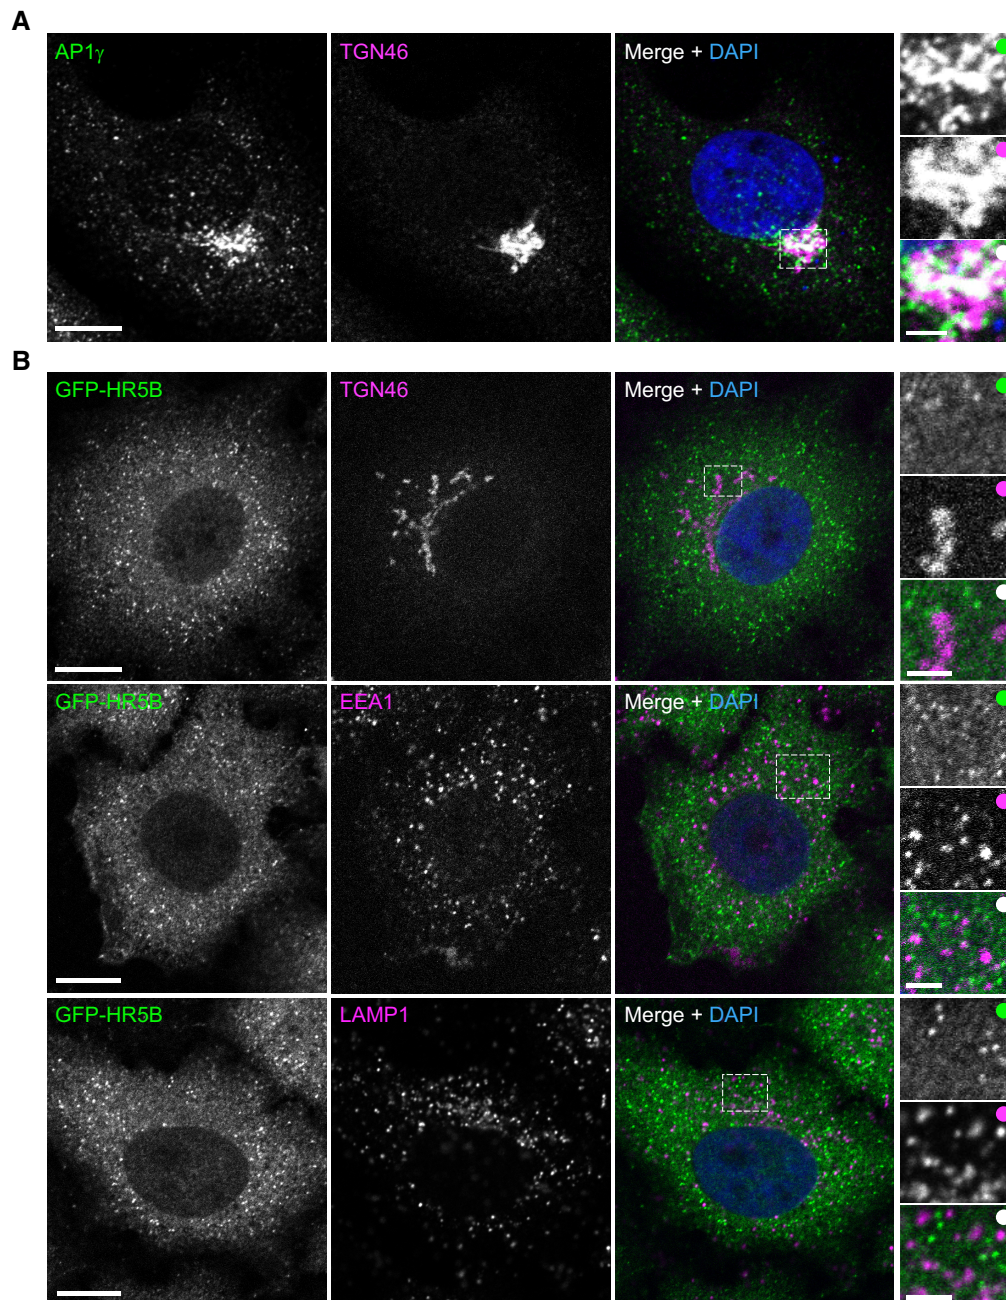

**Figure EV1. Localisation of AP1 $\gamma$  and GFP-HEATR5B with respect to other structures in fixed human cells.**

A, B Representative confocal images of wild-type (A) and stable GFP-HEATR5B (B) HeLa cells stained with antibodies to the indicated proteins (GFP signal in panel (B) was amplified with GFP antibodies). Dashed box shows area magnified in right-hand images. Panel (A) shows that AP1 $\gamma$  is clustered at the periphery of the TGN. Panel (B) shows that association of GFP-HEATR5B (HR5B) with TGN46, EEA1 and LAMP1 is rarely observed. Scale bars: main panels, 10  $\mu$ m; insets, 2.5  $\mu$ m. White circles indicate merge of magnified images.



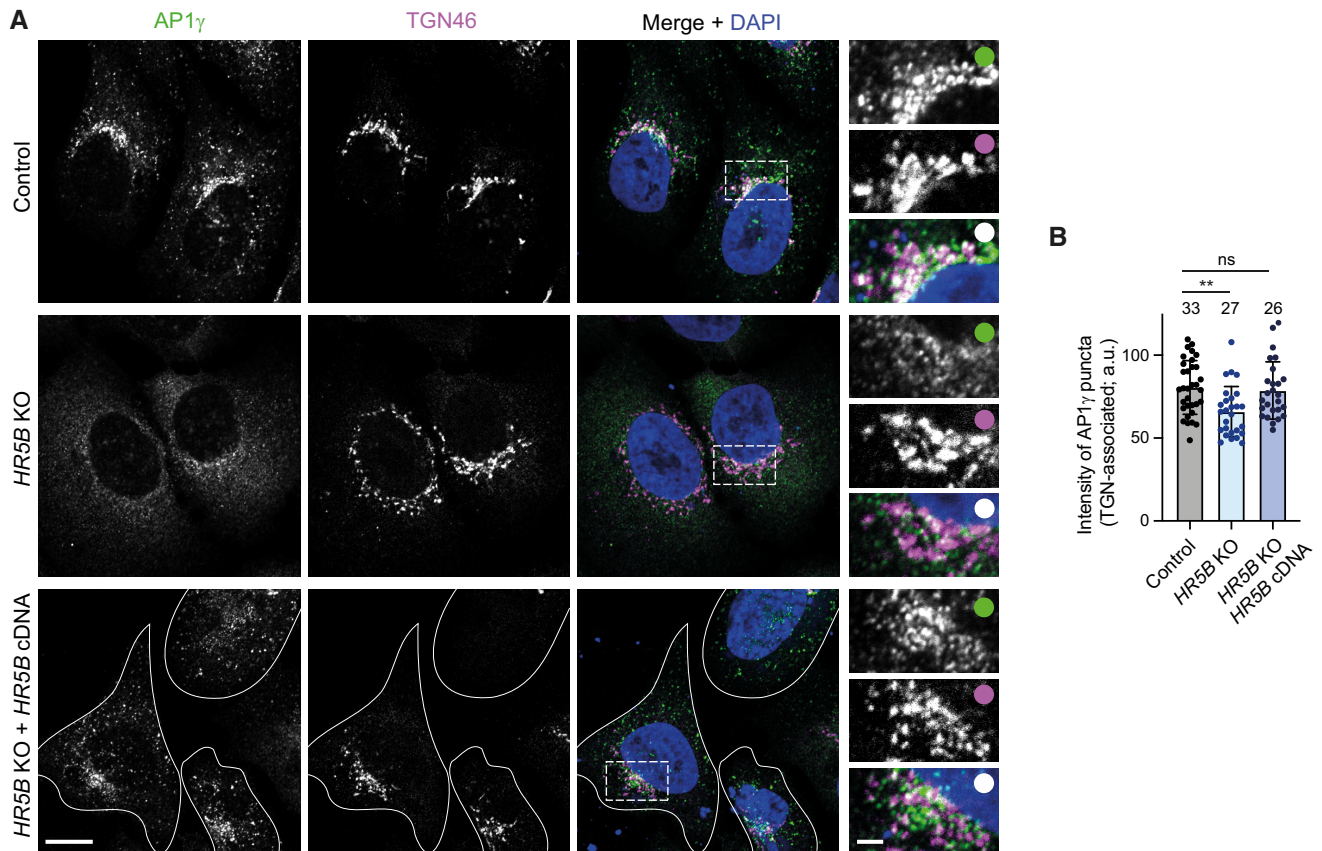

**Figure EV2. Disruption of HEATR5B partially impairs association of AP1 $\gamma$  with the TGN.**

- A** Representative confocal images of control (parental) U2OS cells, *HR5B* KO U2OS cells and *HR5B* KO U2OS cells transfected with a GFP-*HR5B* expression plasmid stained with antibodies to AP1 $\gamma$  and TGN46. For illustrative purposes, the *HR5B* KO cells shown are amongst those with a strong reduction in TGN-associated AP1 $\gamma$  signal. Dashed box shows area magnified in right-hand images. White outlines show mutant cells that express GFP-*HR5B* (as assessed by imaging the GFP channel). Scale bars: (A) 10  $\mu$ m; (A) insets: 2.5  $\mu$ m. White circles indicate merge of magnified images.
- B** Quantification of mean intensity of TGN-associated AP1 $\gamma$  puncta. Circles indicate values from individual cells, with columns and error bars representing mean  $\pm$  SD. Number of cells analysed is shown above columns. Statistical significance was evaluated with a one-way ANOVA test with Dunnett's multiple comparisons correction: \*\**P* < 0.01.

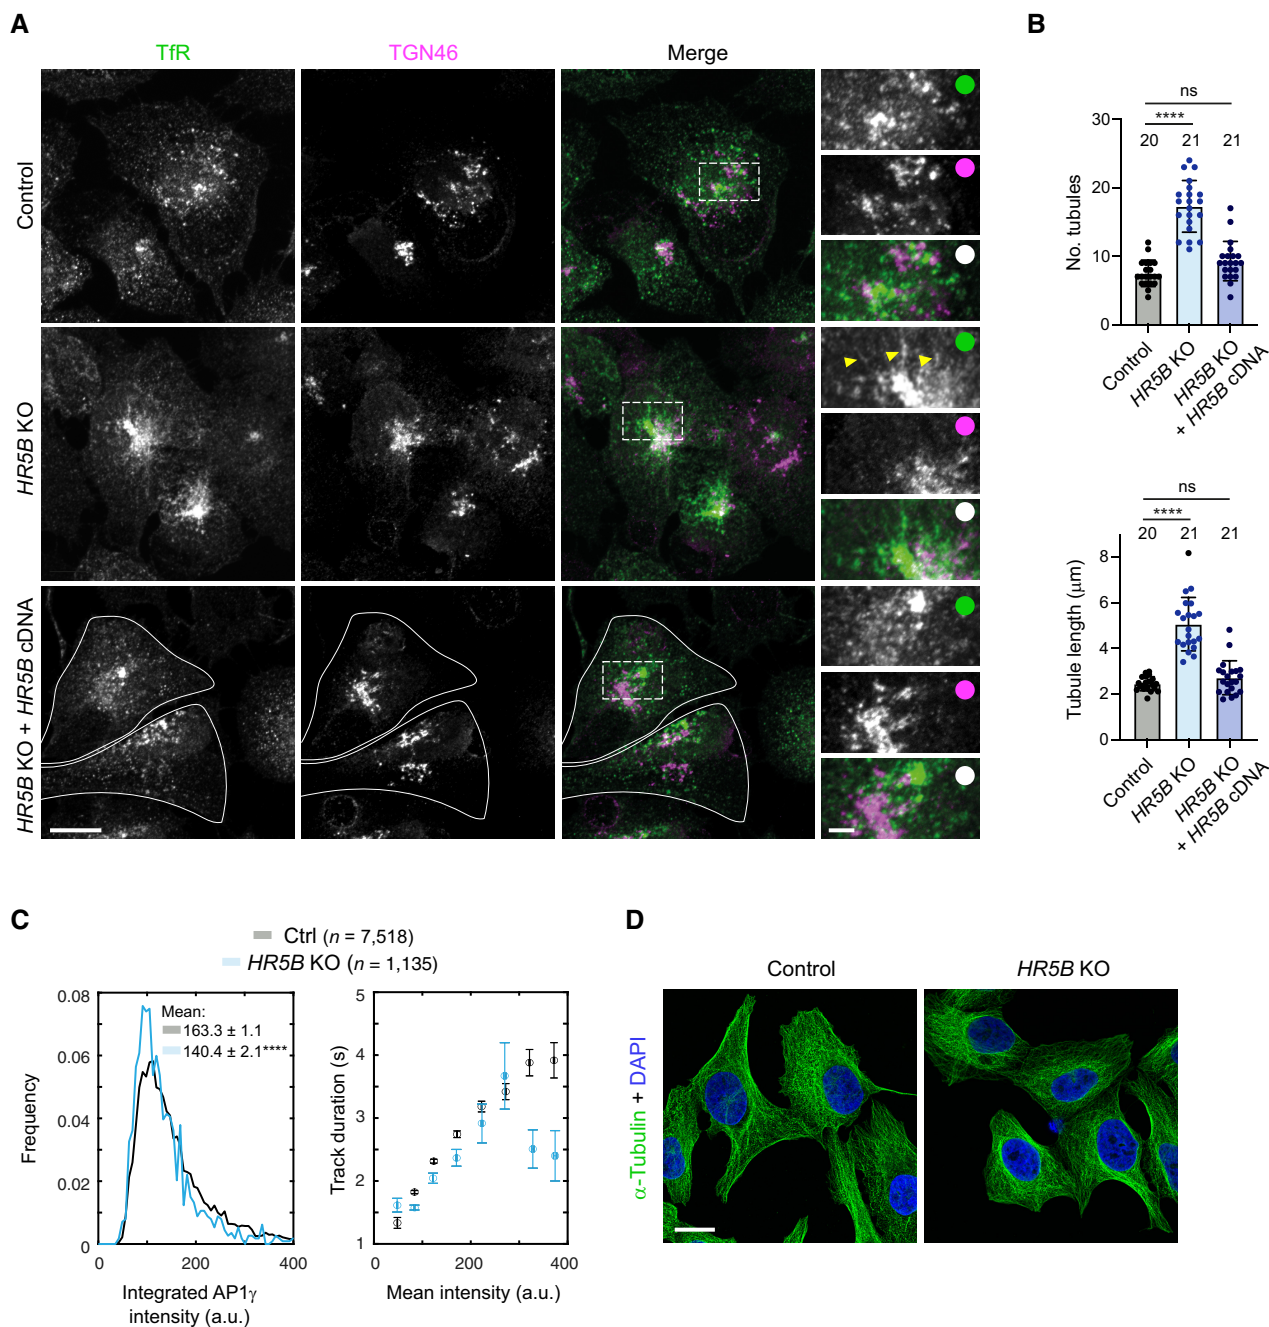

**Figure EV3. Supplementary data on HEATR5B KO phenotypes.**

- A Representative confocal images of control (parental) U2OS cells, *HR5B* KO U2OS cells and *HR5B* KO U2OS cells transfected with a GFP-*HR5B* expression plasmid stained with antibodies to Transferrin receptor (Tfr), which marks the recycling compartment in association with the TGN, and TGN46. Dashed box shows area magnified in right-hand images. Arrowheads show examples of tubulation in *HR5B* KO cells. White outlines show mutant cells that express GFP-*HR5B* (as assessed by imaging the GFP channel). White circles indicate merge of magnified images.
- B Quantification of number and length of Tfr-positive, TGN-associated tubules. Circles indicate values from individual cells, with columns and error bars representing mean  $\pm$  SD. Number of cells analysed is shown above columns. Statistical significance was evaluated with a one-way ANOVA test with Dunnett's multiple comparisons correction.  $****P < 0.0001$ .
- C Quantification of AP1 $\sigma$ 1-RFP particle intensity (left) and track duration versus mean particle intensity (right) in image series of control and *HR5B* KO live U2OS cells.  $n$  = number of particles (from 31 control and 17 KO U2OS cells). Errors represent SEM. In left-hand panel, a shift in the distribution of intensity values to the left in mutant cells indicates dimmer fluorescence (statistical significance was evaluated with a Mann-Whitney U test.  $****P < 0.0001$ ).
- D Representative confocal images of control (parental) and *HR5B* KO U2OS cells stained with  $\alpha$ -tubulin antibodies, showing no overt difference in the architecture of the microtubule cytoskeleton.

Data information: Scale bars: (A) 15  $\mu\text{m}$ ; (A) insets, 3  $\mu\text{m}$ ; (D) 20  $\mu\text{m}$ .

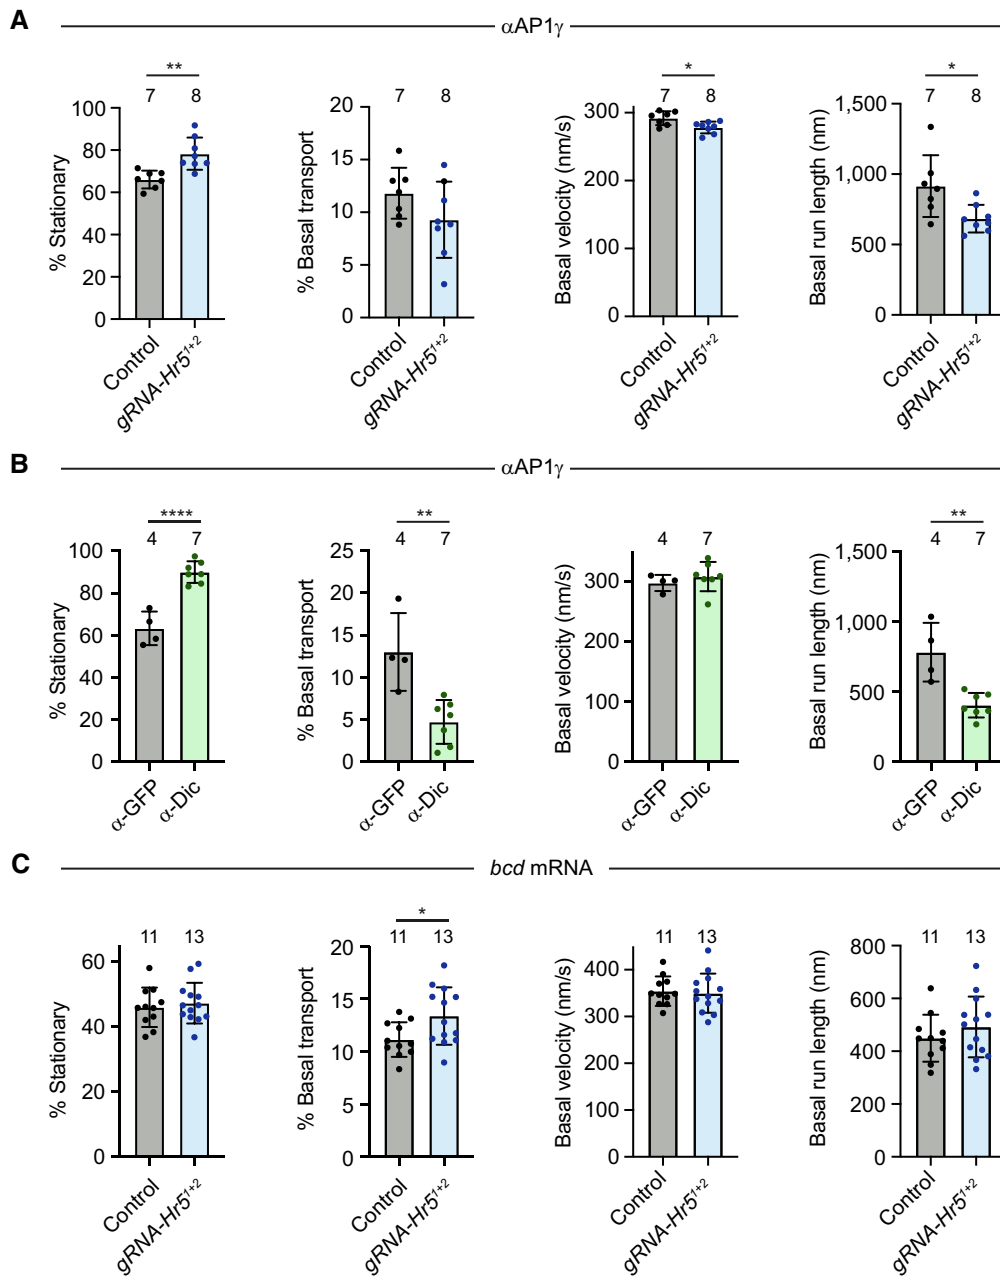

**Figure EV4. Quantification of frequency of stationary events and basal transport in AP1 $\gamma$  and *bcd* mRNA motility assays.**

A–C Quantification of the indicated parameters for AP1 $\gamma$  (A, B) and *bcd* mRNA (C) in embryos of control (*nos-cas9*) and *nos-cas9*, *gRNA-Hr5<sup>+/2</sup>* mothers (A, C) or wild-type embryos pre-injected with function-blocking Dic antibodies or control GFP antibodies (B). “% stationary” and “% basal” are the percentages of particle trajectory time that are classed as immobile or undergoing basal transport, respectively. Circles are mean values for individual embryos; columns and error bars represent means  $\pm$  SD of these mean values; numbers of embryos injected is shown above columns. At least 24 particles were analysed per embryo. Statistical significance was evaluated with an unpaired two-tailed *t*-test: \*\*\*\**P* < 0.0001; \*\**P* < 0.01; \**P* < 0.05.

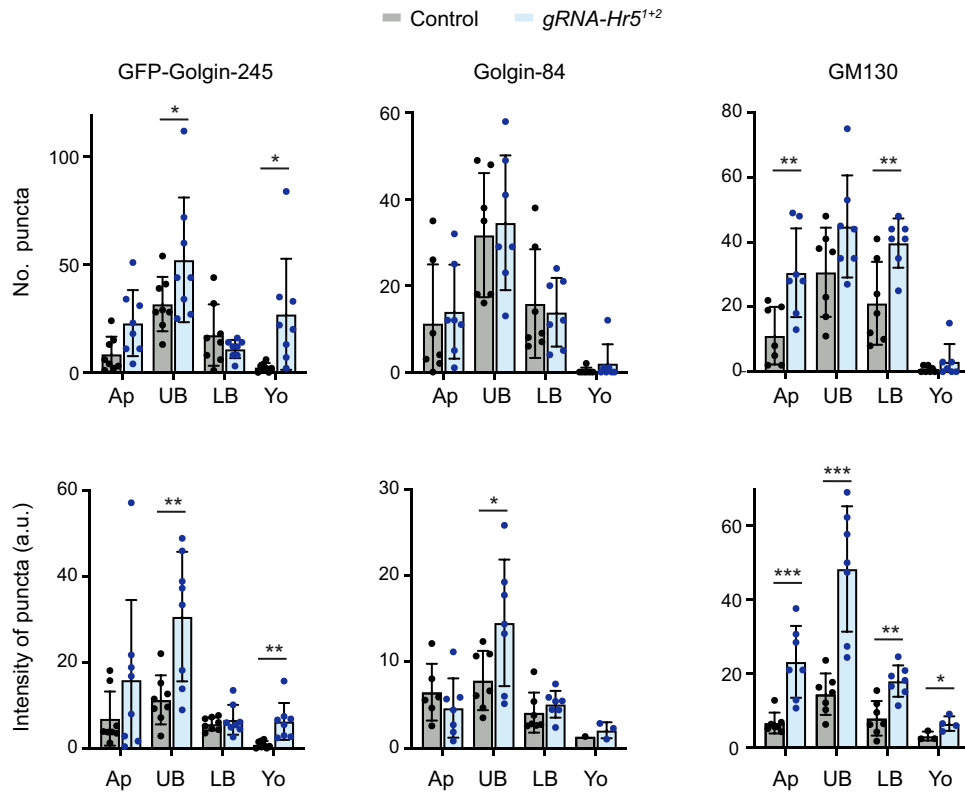

**Figure EV5. Quantification of Golgi protein localisation in control and *Heatr5* mutant blastoderm embryos.**

Charts show values for number of puncta and intensity of puncta for the indicated golgin proteins in different regions of the cytoplasm of embryos from control (*nos-cas9*) and *nos-cas9, gRNA-Hr5<sup>+</sup>2* mothers (Ap, apical to the nuclei; UB, upper basal region; LB, lower basal region; Yo, yolk). Columns and error bars show mean of values per embryo  $\pm$  SD; circles show mean values for individual embryos. At least 50 puncta were analysed per embryo. Statistical significance was evaluated with an unpaired two-tailed t-test: \*\*\**P* < 0.001; \*\**P* < 0.01; \**P* < 0.05. Consistent phenotypes were observed in two biological replicates; quantification is from a single biological replicate.



## APPENDIX

### **HEATR5B associates with dynein-dynactin and promotes motility of AP1-bound endosomal membranes**

Madan et al.

#### **Table of contents:**

|                                                                                                                                                                        |    |
|------------------------------------------------------------------------------------------------------------------------------------------------------------------------|----|
| Appendix Figure S1. Purified protein samples.                                                                                                                          | 2  |
| Appendix Figure S2. Association of GFP-HEATR5B with AP1 $\gamma$ and RAB11A in live cells and validation of <i>DYNC1H1</i> siRNA.                                      | 3  |
| Appendix Figure S3. Strategy for generating HEATR5B deficient human cells with CRISPR/Cas9.                                                                            | 4  |
| Appendix Figure S4. Disruption of AP1 $\gamma$ localisation in additional <i>HEATR5B</i> mutant clonal U2OS cell lines and phenotypic rescue with <i>HEATR5B</i> cDNA. | 5  |
| Appendix Figure S5. Clustered RAB11A and AP1 $\gamma$ -positive structures in GFP-HEATR5B overexpressing cells are in the vicinity of the TGN.                         | 6  |
| Appendix Figure S6. Generation of a <i>Drosophila</i> <i>Heatr5</i> mutant allele and analysis of the <i>Heatr5</i> zygotic and maternal phenotypes.                   | 7  |
| Appendix Figure S7. Supplementary results of CRISPR-based depletion of maternally provided <i>Heatr5</i> .                                                             | 8  |
| Appendix Figure S8. Supplementary information and results for AP1 $\gamma$ motility assays in <i>Drosophila</i> embryos.                                               | 9  |
| Appendix Figure S9. Golgin-245 targeting strategy.                                                                                                                     | 10 |
| Appendix Figure S10. Supplementary information on protein localisation and trafficking in the <i>Drosophila</i> embryo.                                                | 11 |
| Appendix Table S1. Non-dynein-dynactin components enriched on the dynein tail vs tag control in the absence of exogenous dynactin in either tail configuration         | 12 |
| Appendix Table S2. Non-dynein-dynactin components enriched on the dynein tail vs tag control in the presence of exogenous dynactin in at least one tail configuration  | 14 |
| Appendix Table S3. Information on <i>HEATR5B</i> mutant U2OS cell lines                                                                                                | 15 |
| Appendix Table S4. Oligonucleotides used to create gRNA plasmids for CRISPR in <i>Drosophila</i>                                                                       | 16 |

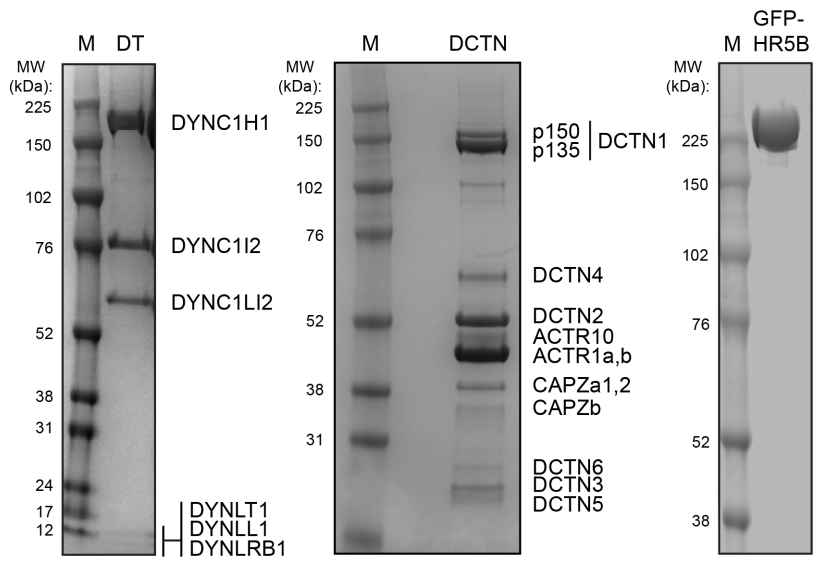

**Appendix Figure S1 - Purified protein samples.**

Images of Coomassie-stained gel lanes after electrophoresis of the human dynein tail complex (DT), pig brain dynactin (DCTN) and GFP tagged human HEATR5B (HR5B). Note that DCTN1 exists as two different isoforms (p150 and p135). M, protein markers; MW, molecular weight of protein markers.

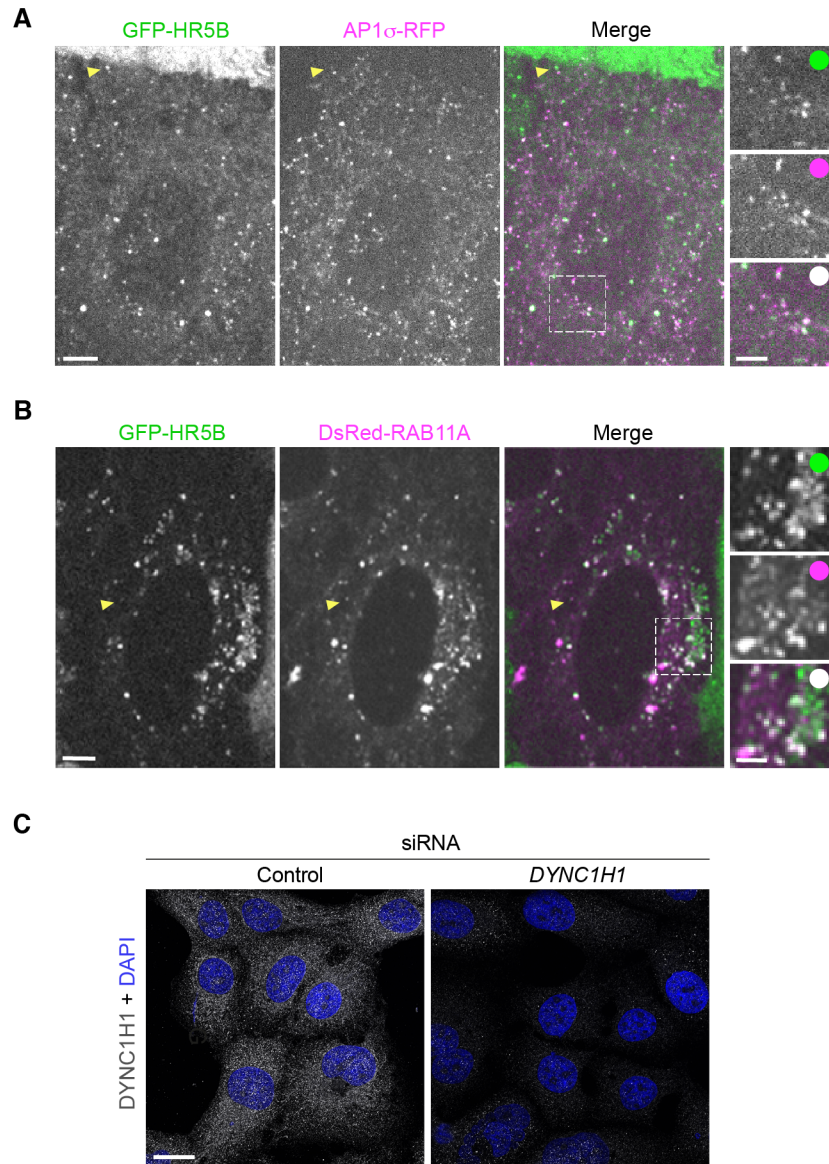

**Appendix Figure S2 - Association of GFP-HEATR5B with AP1 $\gamma$  and RAB11A in live cells and validation of *DYNC1H1* siRNA.**

A, B Representative spinning disk confocal images of HeLa cells that have a stable integration of a GFP-HEATR5B (HR5B) construct and have been transfected with AP1 $\sigma$ -RFP or DsRed-RAB11A expression plasmids. Dashed boxes show areas magnified in right-hand images. Arrowheads show particles highlighted in Movies EV2 and EV4 that undergo long-range transport.

C Representative confocal images of HeLa cells treated with control or *DYNC1H1* siRNAs and stained with a DYNC1H1 antibody, confirming effective knockdown of the protein with *DYNC1H1* siRNAs.

Data information: Scale bars: A and B, 5  $\mu$ m; A and B insets, 2.5  $\mu$ m; C, 20  $\mu$ m.

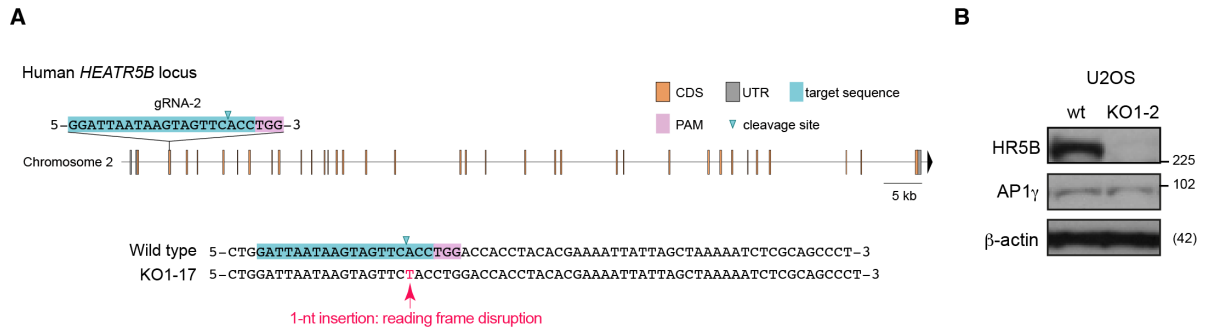

**Appendix Figure S3 - Strategy for generating HEATR5B deficient human cells with CRISPR/Cas9.**

A Position of target site of gRNA in human *HEATR5B* locus and sequence of U2OS clone 1-17 (which was used for mutant analysis unless stated otherwise) compared to the wild-type precursor. Information on indels in the other mutant cell lines is available in Appendix Table S3.

B Immunoblots showing loss of HEATR5B (HR5B) protein in U2OS KO1-2 clone. Equivalent data for KO1-17 clone is shown in Fig 4D.



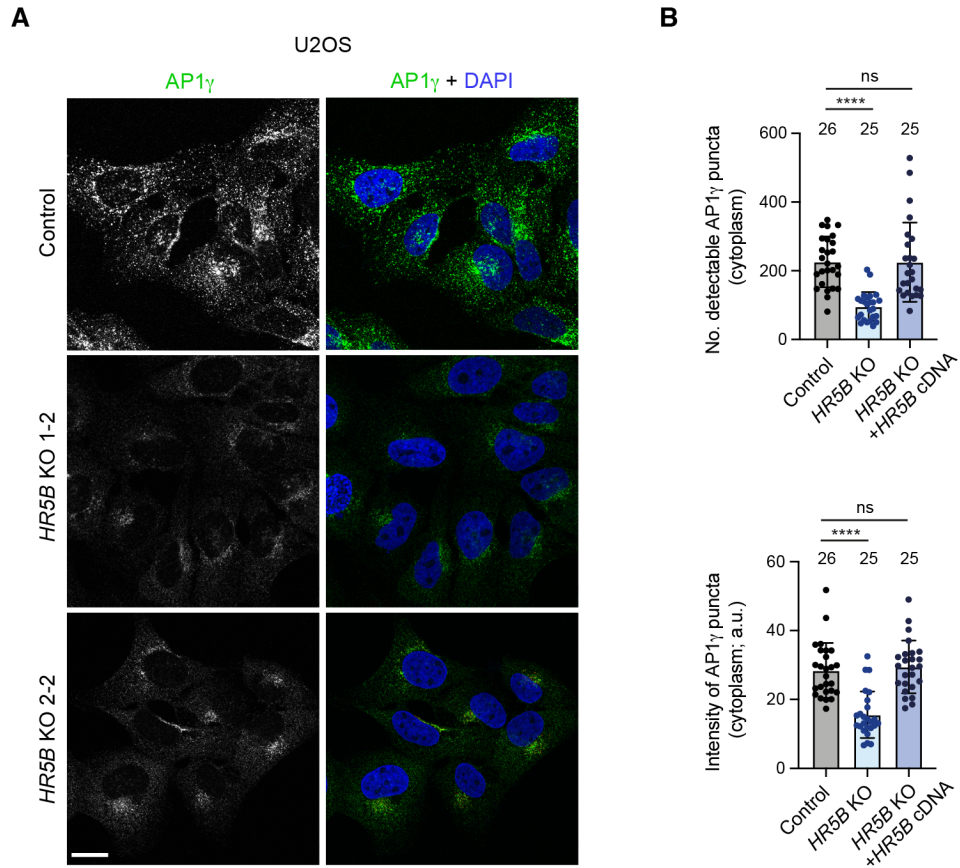

**Appendix Figure S4 - Disruption of AP1 $\gamma$  localisation in additional *HEATR5B* mutant clonal U2OS cell lines and phenotypic rescue with *HEATR5B* cDNA.**

A Representative confocal images of control (parental) and additional *HEATR5B* (*HR5B*)-mutant U2OS clonal lines. Scale bar: 15  $\mu$ m.

B Quantification of number and mean total intensity of AP1 $\gamma$  puncta in control U2OS cells, *HR5B* KO U2OS cells and *HR5B* U2OS cells transfected with a GFP-*HR5B* expression plasmid (a.u., arbitrary units; see Figure EV2A for representative images for rescue condition). Circles indicate values from individual cells, with columns and error bars representing mean  $\pm$  S.D. Numbers of cells analysed is shown above columns. Statistical significance was evaluated with a one-way ANOVA test with multiple comparisons correction. \*\*\*\*P <0.0001.

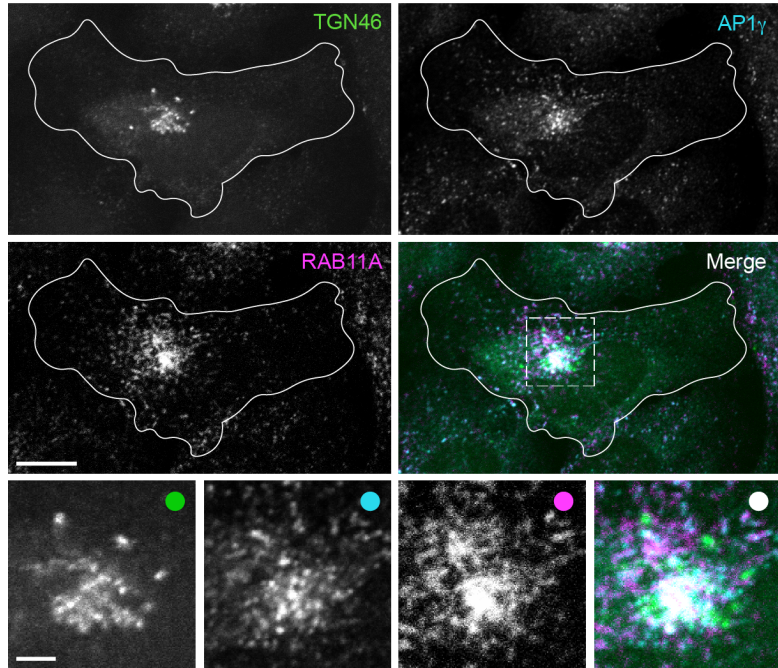

**Appendix Figure S5 – Clustered RAB11A and AP1 $\gamma$ -positive structures in GFP-HEATR5B overexpressing cells are in the vicinity of the TGN.**

Representative confocal images GFP-HEATR5B overexpressing cell stained with the indicated antibodies. White outline shows cell that expresses GFP-HR5B (as assessed by imaging the GFP channel). Dashed box shows area magnified in bottom row of images. Scale bar: 10  $\mu\text{m}$ ; insets, 2.5  $\mu\text{m}$ .

**A**

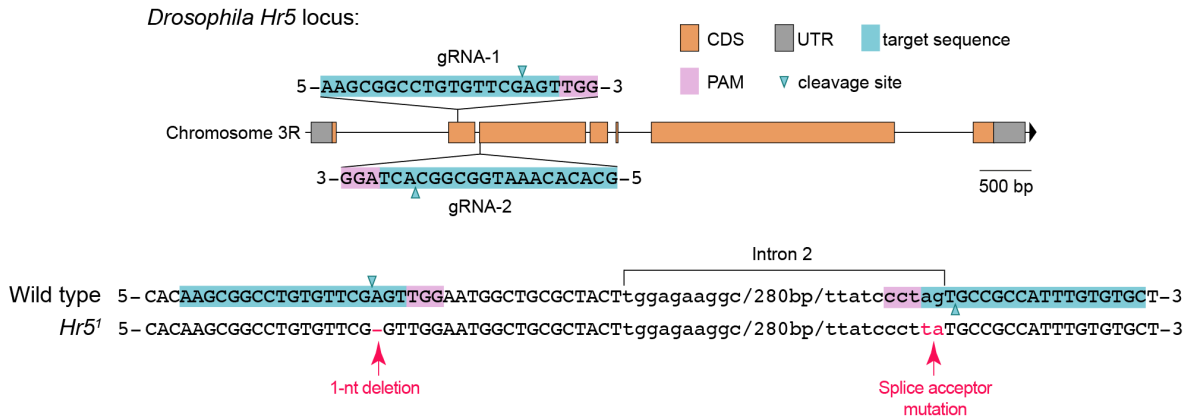

**B**

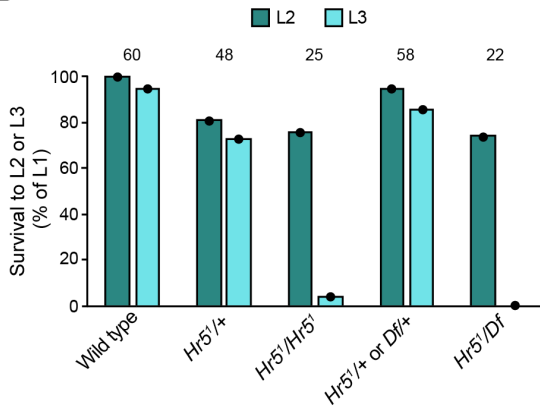

**C**

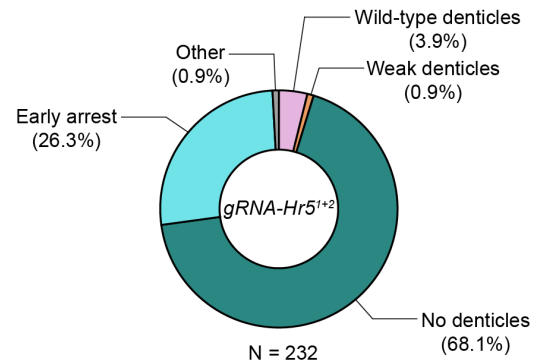

**Appendix Figure S6 - Generation of a *Drosophila Heatr5* mutant allele and analysis of the *Heatr5* zygotic and maternal phenotypes.**

A Position of target sites of *gRNA-Hr5*<sup>1+2</sup> transgene in *Heatr5* (*Hr5*) locus (top) and sequence of the *Hr5*<sup>1</sup> mutant allele compared to the wild-type precursor (bottom). PAM, protospacer adjacent motif. In the sequence alignment, the position of the PAM and target sequence is transposed to the opposite strand for simplicity.

B Lethal phase analysis of *Hr5*<sup>1</sup> zygotic mutants. L1, L2 and L3 are successive larval instar stages. As none of the genotypes exhibited significant lethality during embryogenesis, only the rate of survival of L1 larvae of the indicated genotypes to L2 or L3 stages was recorded (*Df*: chromosomal deficiency *Df(3R)BSC222*, which uncovers the *Hr5* locus). Data are expressed as a percentage of initial number of L1 larvae for each genotype, with the number of L1 larvae followed for each genotype shown above columns. *Hr5*<sup>1/+</sup> and *Hr5*<sup>1</sup> homozygous larvae were siblings from the same cross, as were '*Hr5*<sup>1/+</sup> or *Df*<sup>1/+</sup>' and *Hr5*<sup>1/Df</sup> larvae.

C Quantification of cuticle defects of unhatched embryos from *nos-cas9 gRNA-Hr5*<sup>1+2</sup> females. Embryos in the 'No denticles' category had reached late stages of embryogenesis as judged by the development of obvious internal structures, such as abdominal segments and/or mouth parts; 'Early arrest' embryos had no obvious internal structures; 'Other' represents rare instances of axial patterning defects. Data are pooled from egg lays of females generated in three independent crosses, across which the results were very consistent. N is number of embryos analysed.

**A***Drosophila Hr5* locus: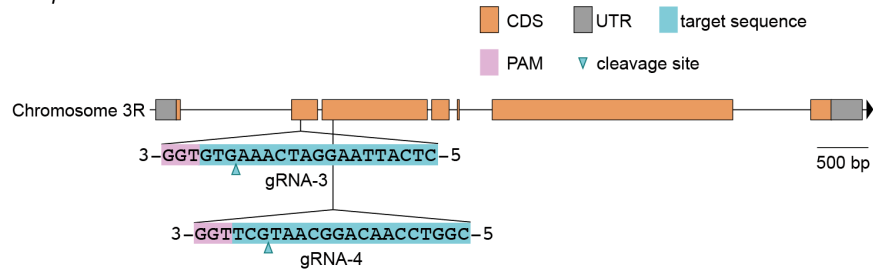**B**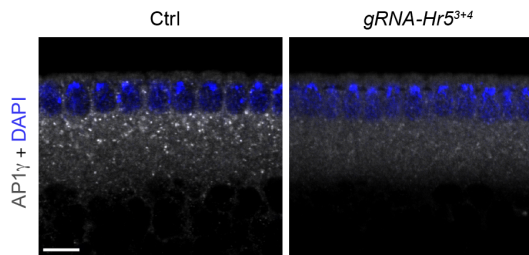**C**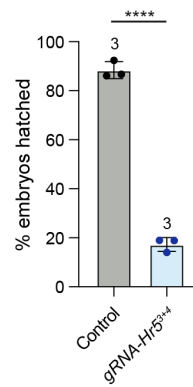**D**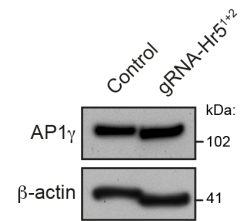**Appendix Figure S7 - Supplementary results of CRISPR-based depletion of maternally provided Heatr5.**

A Position of target sites of *gRNA-Hr5<sup>3+4</sup>* transgene in the *Heatr5* (*Hr5*) locus.

B Representative confocal images of embryos from control (*nos-cas9*) and *nos-cas9 gRNA-Hr5<sup>3+4</sup>* females stained with AP1 $\gamma$  antibodies. Scale bar, 10  $\mu$ m.

C Hatching frequency of embryos laid by control (*nos-cas9*) and *nos-cas9 gRNA-Hr5<sup>3+4</sup>* females. Chart shows mean values per egg lay  $\pm$  SD; circles are values for individual egg lays (at least 150 embryos analysed per egg lay); number of egg lays is shown above columns. Statistical significance was evaluated with a t-test: \*\*\*\*P < 0.0001.

D Immunoblot images showing AP1 $\gamma$  protein level in cohorts of 0.5–3.5 h embryos laid by control (*nos-cas9*) and *nos-cas9 gRNA-Hr5<sup>3+4</sup>* females.  $\beta$ -actin was used as a loading control.



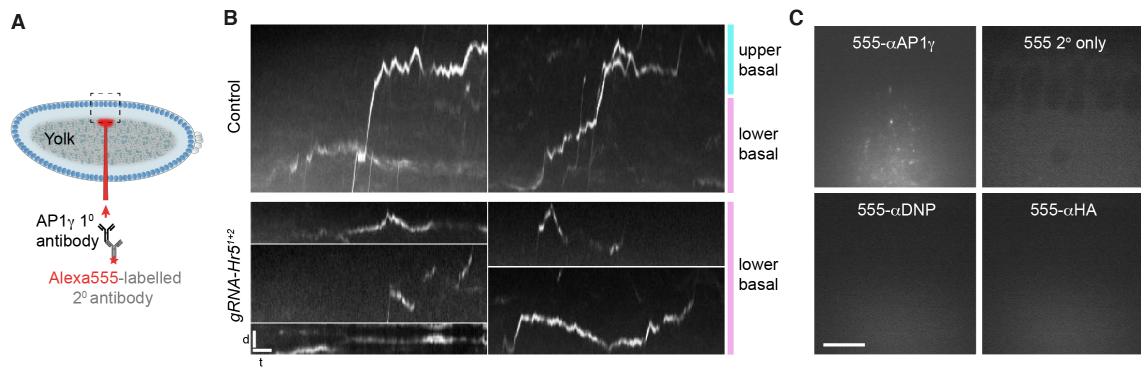

**Appendix Figure S8 - Supplementary information and results for AP1 $\gamma$  motility assays in *Drosophila* embryos.**

A Diagram of microinjection procedure. Dashed box shows typical field-of-view for imaging.

B Kymographs showing examples of AP1 $\gamma$  motility in embryos from control (*cas9*) and *nos-cas9 gRNA-Hr5<sup>1+2</sup>* females. Apical is to the top of each image. d = distance and t = time. Scale bars, 2  $\mu$ m and 20 s.

C Representative images of embryos injected  $\sim$  60 s earlier with the indicated antibodies; note the absence of bright puncta for all antibodies except  $\alpha$ -AP1 $\gamma$ . Scale bar, 10  $\mu$ m.

*Drosophila Golgin245* locus

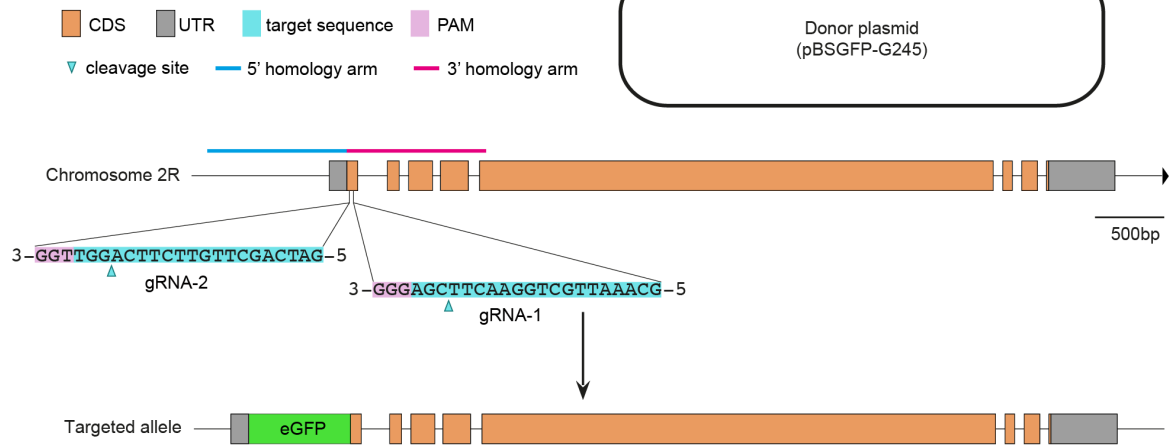

**Appendix Figure S9 - Golgin-245 targeting strategy.**

Illustration of target sites and homology arms in the *Golgin245* locus, the GFP donor construct, and the *Golgin245* locus after knock-in of GFP.

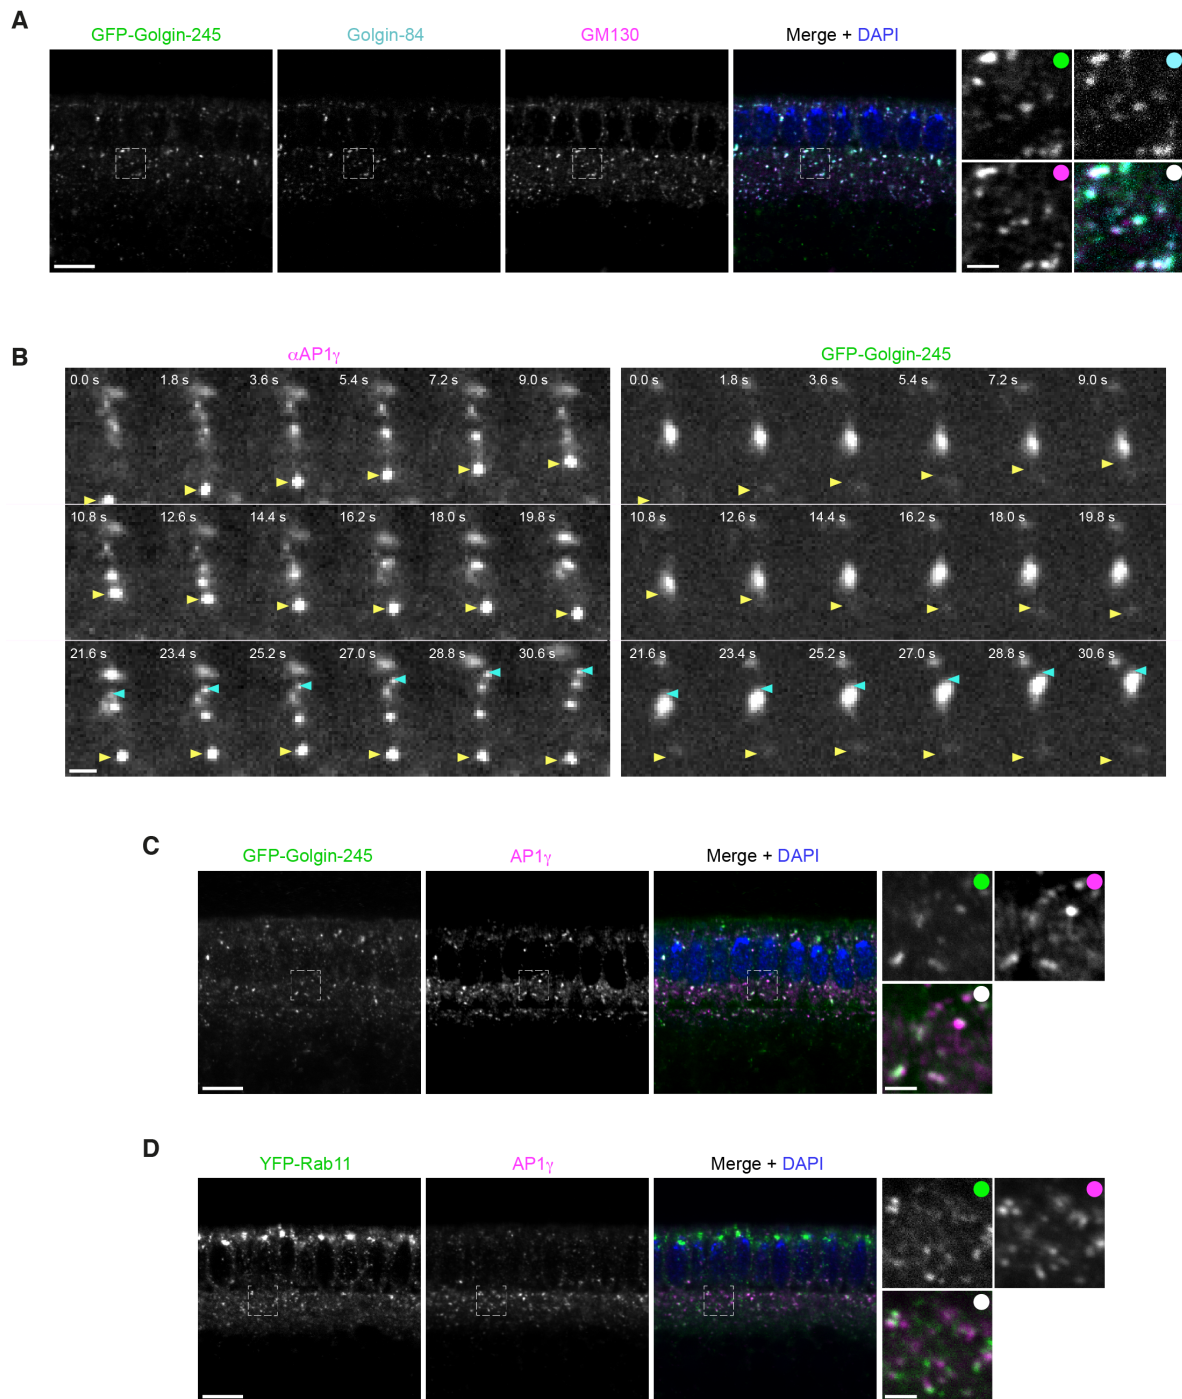

**Appendix Figure S10 - Supplementary information on protein localisation and trafficking in the *Drosophila* embryo.**

A Representative confocal images of blastoderm embryo stained for GFP-Golgin-245, Golgin-84 and GM130 showing the GFP fusion protein localises to the Golgi.

B Representative single-channel stills corresponding to the image series from Figure 7A (with yellow and cyan arrowheads in the equivalent positions).

C, D Representative confocal images of wild-type blastoderm embryos stained for GFP-Golgin-245 and AP1 $\gamma$  (C) or YFP-Rab11 and AP1 $\gamma$  (D). Dashed boxes show areas magnified in right-hand images. Scale bars: A, C and D, 10  $\mu$ m; B, and A, C, D insets, 2  $\mu$ m.

**Appendix Table S1. Non-dynein-dynactin components enriched on the dynein tail vs tag control in the absence of exogenous dynactin in either tail configuration**

| Protein   | Function                                         | Identifier <sup>(1)</sup> | Polypeptide length (aa) | Position(s) of predicted coiled coil(s) <sup>(2)</sup> |
|-----------|--------------------------------------------------|---------------------------|-------------------------|--------------------------------------------------------|
| Arglu1    | RNA binding/<br>transcriptional regulation       | Q3UL36                    | 271                     | -                                                      |
| Asap3     | Arf GTPase activating factor                     | Q5U464                    | 904                     | 142-167, 249-273                                       |
| Bicd2     | Dynein-dynactin cargo adaptor                    | Q921C5                    | 820                     | 20-270, 340-539, 662-804                               |
| Btf3l4    | Transcriptional regulation                       | Q9CQH7                    | 158                     | -                                                      |
| Hist2h2bb | Nucleosome component                             | Q64525                    | 126                     | -                                                      |
| Larp7     | RNA binding/ snRNA processing                    | Q05CL8                    | 570                     | -                                                      |
| Luc7l     | Putative RNA binding                             | Q9CYI4                    | 371                     | 87-177, 220-256                                        |
| Manf      | Neurotrophic factor                              | Q9CXI5                    | 179                     | -                                                      |
| Mapk8ip3  | Dynein-dynactin and kinesin cargo adaptor (Jip3) | Q9ESN9                    | 1337                    | 58-177, 437-555                                        |
| Nde1      | Regulator of dynein and Lis1                     | Q9CZA6                    | 344                     | 18-188                                                 |
| Pdxk      | Vitamers kinase                                  | Q8K183                    | 312                     | -                                                      |
| Pfn2      | Actin binding                                    | Q9JJV2                    | 140                     | -                                                      |
| Pkfl      | ATP-dependent 6-phosphofructokinase              | P12382                    | 780                     | -                                                      |
| Ppp3R1    | Calcineurin subunit                              | Q63810                    | 170                     | -                                                      |
| Prdx2     | Thiol-specific peroxidase                        | Q61171                    | 198                     | -                                                      |
| Psd3      | Arf6 GEF                                         | Q2PFD7                    | 1037                    | 911-941                                                |
| Pura      | Nucleic acid binding                             | P42669                    | 321                     | -                                                      |
| Purb      | Nucleic acid binding                             | O35295                    | 324                     | -                                                      |
| Rpl7a     | Large ribosomal subunit                          | P12970                    | 266                     | -                                                      |
| Rpl10a    | Large ribosomal subunit                          | P53026                    | 217                     | -                                                      |
| Rpl12     | Large ribosomal subunit                          | P35979                    | 165                     | -                                                      |
| Rpl17     | Large ribosomal subunit                          | Q9CPR4                    | 184                     | -                                                      |



|         |                                 |        |     |         |
|---------|---------------------------------|--------|-----|---------|
| Rpl18   | Large ribosomal subunit         | P35980 | 188 | -       |
| Rpl31   | Large ribosomal subunit         | P62900 | 125 | -       |
| Rplp1   | Translational elongation        | P47955 | 114 | -       |
| Rps10   | Small ribosomal subunit         | P63325 | 165 | -       |
| Rps13   | Small ribosomal subunit         | P62301 | 151 | -       |
| Rps18   | Small ribosomal subunit         | P62270 | 152 | -       |
| Rps23   | Small ribosomal subunit         | P62267 | 143 | -       |
| Rps28   | Small ribosomal subunit         | P62858 | 69  | -       |
| Rsrc2   | Cell proliferation regulator    | A2RTL5 | 376 | 171-214 |
| Slc35g2 | Solute carrier                  | D3YVE8 | 412 | -       |
| Snrnp70 | Spliceosomal U1 snRNP component | Q62376 | 448 | -       |
| Snrpd1  | Spliceosomal snRNP component    | P62315 | 119 | -       |
| Tma7    | Unknown                         | Q8K003 | 64  | 21-50   |

- 
- (1) UniProtKB accession number (canonical mouse sequence)  
(2) Information compiled at UniProtKB (<https://www.uniprot.org>)

**Appendix Table S2. Non-dynein-dynactin components enriched on the dynein tail vs tag control in the presence of exogenous dynactin in at least one tail configuration**

| Protein | Molecular function                        | Identifier <sup>(1)</sup> | Polypeptide length (aa) | Position(s) of predicted coiled coil(s) <sup>(2)</sup> |
|---------|-------------------------------------------|---------------------------|-------------------------|--------------------------------------------------------|
| Acp1    | Phosphotyrosine protein phosphatase       | Q9D358                    | 158                     | -                                                      |
| Calm1   | Calcium-based enzyme regulation           | P0DP26                    | 149                     | -                                                      |
| Cttnbp2 | Regulates neuronal cortactin distribution | B9EJA2                    | 1648                    | 119-274                                                |
| Gfap    | Intermediate filament protein             | P03995                    | 430                     | 70-214, 228-374                                        |
| Heatr5B | AP-1 complex associated                   | Q8C547                    | 2070                    | -                                                      |
| Hnrnpu  | DNA and RNA binding protein               | Q8VEK3                    | 800                     | 626-653                                                |
| Ppm1e   | Protein phosphates                        | Q80TL0                    | 749                     | -                                                      |
| Rpl14   | Large ribosomal subunit protein           | Q9CR57                    | 217                     | -                                                      |
| Rpl19   | Large ribosomal subunit protein           | P84099                    | 196                     | -                                                      |
| Rpl6    | Large ribosomal subunit protein           | P47911                    | 296                     | -                                                      |
| Rps7    | Small ribosomal subunit protein           | P62082                    | 194                     | -                                                      |
| Rps8    | Small ribosomal subunit protein           | P62242                    | 208                     | -                                                      |
| Rps16   | Small ribosomal subunit protein           | P14131                    | 146                     | -                                                      |
| Smarca2 | Transcriptional regulation                | Q6DIC0                    | 1577                    | -                                                      |
| Strip1  | Cytoskeletal regulator                    | Q8C079                    | 837                     | -                                                      |
| Tial1   | RNA binding                               | P70318                    | 392                     | -                                                      |
| Wdr91   | Endosomal trafficking                     | Q7TMQ7                    | 748                     | -                                                      |

(1) UniProtKB accession number (canonical mouse sequence)

(2) Information compiled at UniProtKB (<https://www.uniprot.org>)

**Appendix Table S3. Information on *HEATR5B* mutant U2OS cell lines**

| Clone name | Types of mutation detected (nt) <sup>(1)</sup> | Protein expression <sup>(2)</sup> |
|------------|------------------------------------------------|-----------------------------------|
| KO 1-17    | +1                                             | Abolished                         |
| KO 1-2     | +1, -1                                         | Abolished                         |
| KO 2-2     | -20                                            | Abolished                         |

(1) Predominant alleles identified by TIDE; + and – refer, respectively, to insertion and deletions. In cases in which only one allele is detected, mutations may be homozygous or *trans*-heterozygous over an allele that deletes the sequenced region.

(2) Assessed by immunoblotting for full-length protein

**Appendix Table S4. Oligonucleotides used to create gRNA plasmids for CRISPR in *Drosophila***

| Gene             | Constructed plasmid <sup>(1)</sup>  | gRNA cloning oligos <sup>(2)</sup>                                                                                                                                                                 |
|------------------|-------------------------------------|----------------------------------------------------------------------------------------------------------------------------------------------------------------------------------------------------|
| <i>Heatr5</i>    | <i>pCDF4-gRNA-Hr5<sup>1+2</sup></i> | f : TATATAGGAAAGATATCCGGGTGAACTTCGA <u>AAGCGCCTGT</u><br>GTTTCGAGTGT <sup>TTTTAGAGCTAGAAATAGCAAG</sup><br>r : ATTTTAACTTGCTATTTCTAGCTCTAAAAC <u>AGTGCCGCCAT</u><br>TTGTGTGCCGACGTTAAATTGAAAATAGGTC |
| <i>Heatr5</i>    | <i>pCDF4-gRNA-Hr5<sup>3+4</sup></i> | f : TATATAGGAAAGATATCCGGGTGAACTTCGCTCATTAAAGGA<br>TCAAAGTGGT <sup>TTTTAGAGCTAGAAATAGCAAG</sup><br>r : ATTTTAACTTGCTATTTCTAGCTCTAAAAC <u>AGCATTGCCTG</u><br>TTGGACCGCGACGTTAAATTGAAAATAGGTC         |
| <i>Golgin245</i> | <i>pCFD3-gRNA-G245<sup>1</sup></i>  | f : GTCGCAAA <u>TGCTGGA</u> ACTTCGA<br>r : AAAC <u>TCGAAGTCCAGCA</u> ATTG                                                                                                                          |
|                  | <i>pCFD3-gRNA-G245<sup>2</sup></i>  | f : GTCGATCAGCTTGTTC <u>TTCAGGT</u><br>r : AAACACCTGAAGAACAAGCTGAT                                                                                                                                 |

(1) See Port et al. (2014) for details of vectors.

(2) f, forward; r, reverse. Sequences corresponding to target sequence are underlined. For pCFD4, PCR with the primer pairs using the parental pCFD4 plasmid as a template yields a double gRNA containing product that can be used to produce the desired pCFD4 plasmid. For pCFD3, the primer pairs are annealed before cloning into the Bbs1-cut vector.
