# Supplementary material for: HEATR5B associates with dynein‐dynactin and promotes motility of AP1‐bound endosomal membranes
Source: EMBO J. 2023 Oct 24;42(23):e114473. doi: 10.15252/embj.2023114473 (PMC10690479; doi:10.15252/embj.2023114473)
Supplement: Supplementary file 1 — Appendix [file EMBJ-42-e114473-s007.pdf]

## **APPENDIX**

### **HEATR5B associates with dynein-dynactin and promotes motility of AP1-bound endosomal membranes**

Madan et al.

#### **Table of contents:**

|                                                                                                                                                                        |    |
|------------------------------------------------------------------------------------------------------------------------------------------------------------------------|----|
| Appendix Figure S1. Purified protein samples.                                                                                                                          | 2  |
| Appendix Figure S2. Association of GFP-HEATR5B with AP1 $\gamma$ and RAB11A in live cells and validation of <i>DYNC1H1</i> siRNA.                                      | 3  |
| Appendix Figure S3. Strategy for generating HEATR5B deficient human cells with CRISPR/Cas9.                                                                            | 4  |
| Appendix Figure S4. Disruption of AP1 $\gamma$ localisation in additional <i>HEATR5B</i> mutant clonal U2OS cell lines and phenotypic rescue with <i>HEATR5B</i> cDNA. | 5  |
| Appendix Figure S5. Clustered RAB11A and AP1 $\gamma$ -positive structures in GFP-HEATR5B overexpressing cells are in the vicinity of the TGN.                         | 6  |
| Appendix Figure S6. Generation of a <i>Drosophila</i> <i>Heatr5</i> mutant allele and analysis of the <i>Heatr5</i> zygotic and maternal phenotypes.                   | 7  |
| Appendix Figure S7. Supplementary results of CRISPR-based depletion of maternally provided <i>Heatr5</i> .                                                             | 8  |
| Appendix Figure S8. Supplementary information and results for AP1 $\gamma$ motility assays in <i>Drosophila</i> embryos.                                               | 9  |
| Appendix Figure S9. Golgin-245 targeting strategy.                                                                                                                     | 10 |
| Appendix Figure S10. Supplementary information on protein localisation and trafficking in the <i>Drosophila</i> embryo.                                                | 11 |
| Appendix Table S1. Non-dynein-dynactin components enriched on the dynein tail vs tag control in the absence of exogenous dynactin in either tail configuration         | 12 |
| Appendix Table S2. Non-dynein-dynactin components enriched on the dynein tail vs tag control in the presence of exogenous dynactin in at least one tail configuration  | 14 |
| Appendix Table S3. Information on <i>HEATR5B</i> mutant U2OS cell lines                                                                                                | 15 |
| Appendix Table S4. Oligonucleotides used to create gRNA plasmids for CRISPR in <i>Drosophila</i>                                                                       | 16 |

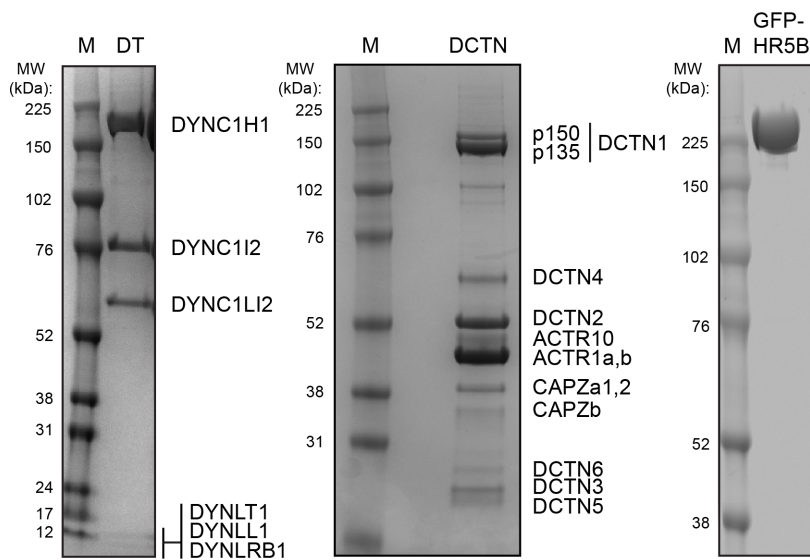

**Appendix Figure S1 - Purified protein samples.**

Images of Coomassie-stained gel lanes after electrophoresis of the human dynein tail complex (DT), pig brain dynactin (DCTN) and GFP tagged human HEATR5B (HR5B). Note that DCTN1 exists as two different isoforms (p150 and p135). M, protein markers; MW, molecular weight of protein markers.

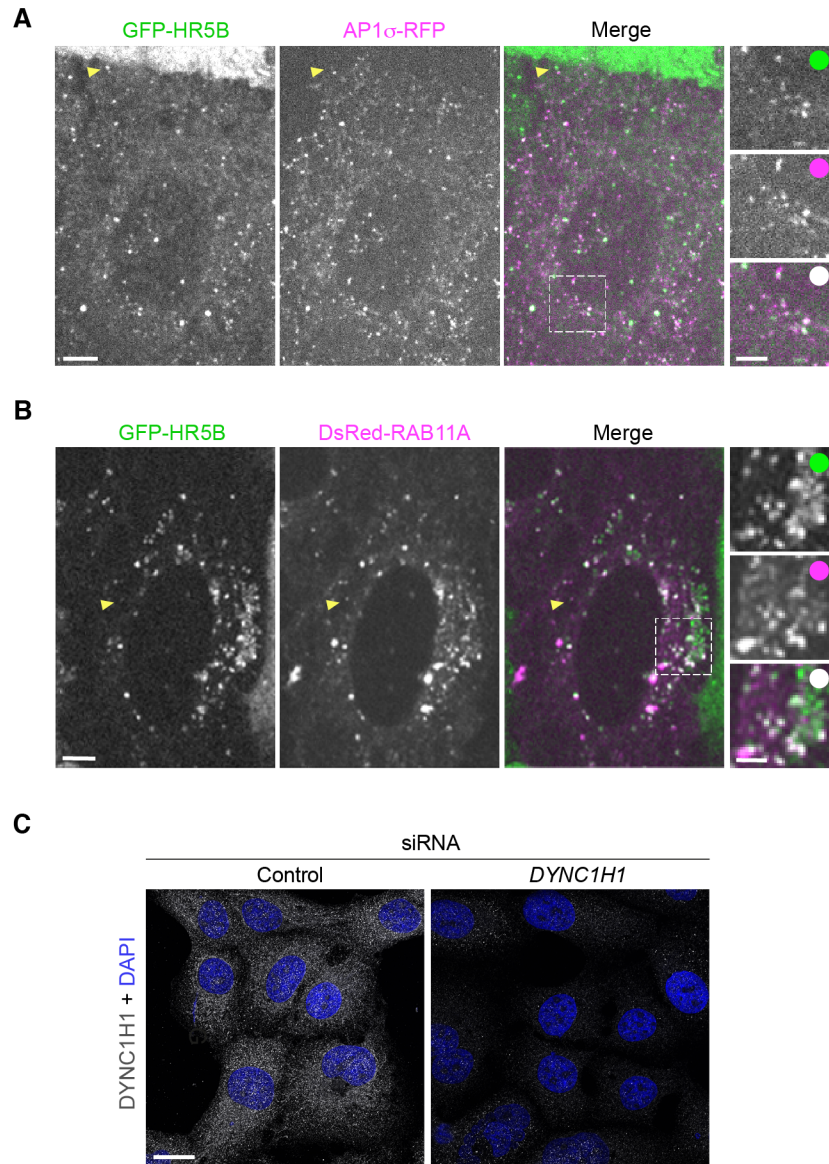

**Appendix Figure S2 - Association of GFP-HEATR5B with AP1 $\gamma$  and RAB11A in live cells and validation of *DYNC1H1* siRNA.**

A, B Representative spinning disk confocal images of HeLa cells that have a stable integration of a GFP-HEATR5B (HR5B) construct and have been transfected with AP1 $\sigma$ -RFP or DsRed-RAB11A expression plasmids. Dashed boxes show areas magnified in right-hand images. Arrowheads show particles highlighted in Movies EV2 and EV4 that undergo long-range transport.

C Representative confocal images of HeLa cells treated with control or *DYNC1H1* siRNAs and stained with a DYNC1H1 antibody, confirming effective knockdown of the protein with *DYNC1H1* siRNAs.

Data information: Scale bars: A and B, 5  $\mu$ m; A and B insets, 2.5  $\mu$ m; C, 20  $\mu$ m.

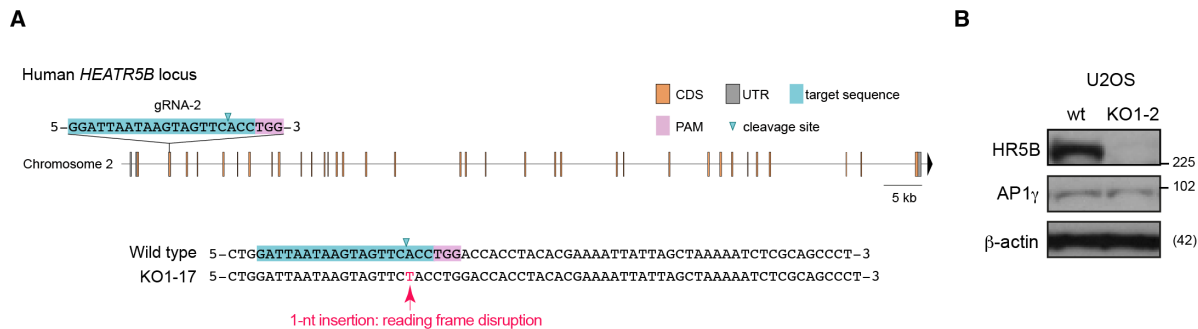

**Appendix Figure S3 - Strategy for generating HEATR5B deficient human cells with CRISPR/Cas9.**

A Position of target site of gRNA in human *HEATR5B* locus and sequence of U2OS clone 1-17 (which was used for mutant analysis unless stated otherwise) compared to the wild-type precursor. Information on indels in the other mutant cell lines is available in Appendix Table S3.

B Immunoblots showing loss of HEATR5B (HR5B) protein in U2OS KO1-2 clone. Equivalent data for KO1-17 clone is shown in Fig 4D.

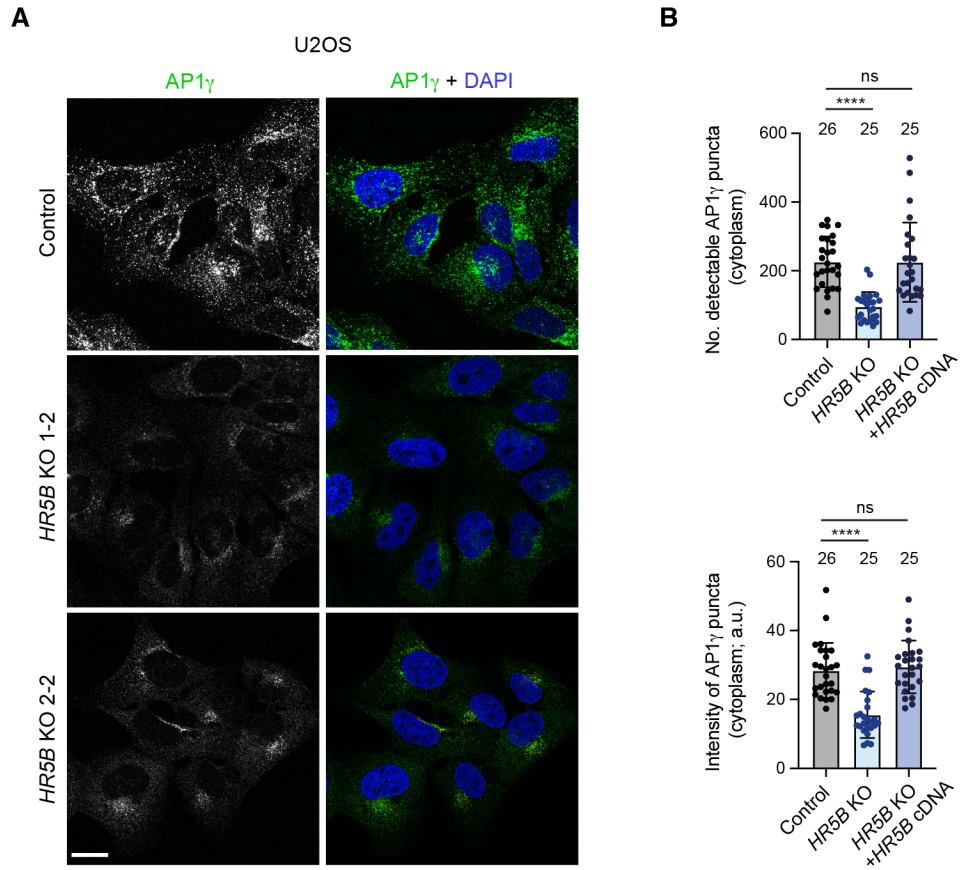

**Appendix Figure S4 - Disruption of AP1 $\gamma$  localisation in additional *HEATR5B* mutant clonal U2OS cell lines and phenotypic rescue with *HEATR5B* cDNA.**

A Representative confocal images of control (parental) and additional *HEATR5B* (*HR5B*)-mutant U2OS clonal lines. Scale bar: 15  $\mu$ m.

B Quantification of number and mean total intensity of AP1 $\gamma$  puncta in control U2OS cells, *HR5B* KO U2OS cells and *HR5B* U2OS cells transfected with a GFP-*HR5B* expression plasmid (a.u., arbitrary units; see Figure EV2A for representative images for rescue condition). Circles indicate values from individual cells, with columns and error bars representing mean  $\pm$  S.D. Numbers of cells analysed is shown above columns. Statistical significance was evaluated with a one-way ANOVA test with multiple comparisons correction. \*\*\*\*P < 0.0001.

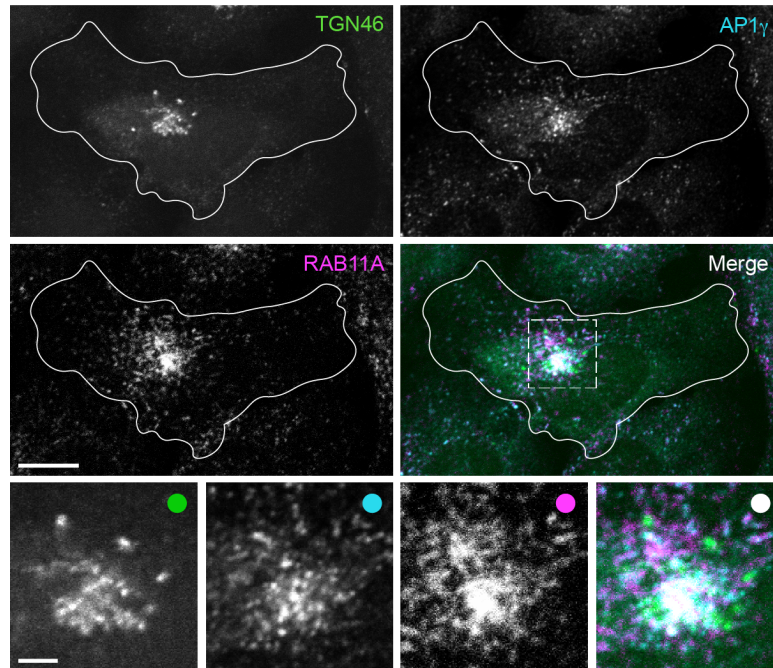

**Appendix Figure S5 – Clustered RAB11A and AP1 $\gamma$ -positive structures in GFP-HEATR5B overexpressing cells are in the vicinity of the TGN.**

Representative confocal images GFP-HEATR5B overexpressing cell stained with the indicated antibodies. White outline shows cell that expresses GFP-HR5B (as assessed by imaging the GFP channel). Dashed box shows area magnified in bottom row of images. Scale bar: 10  $\mu\text{m}$ ; insets, 2.5  $\mu\text{m}$ .

**A**

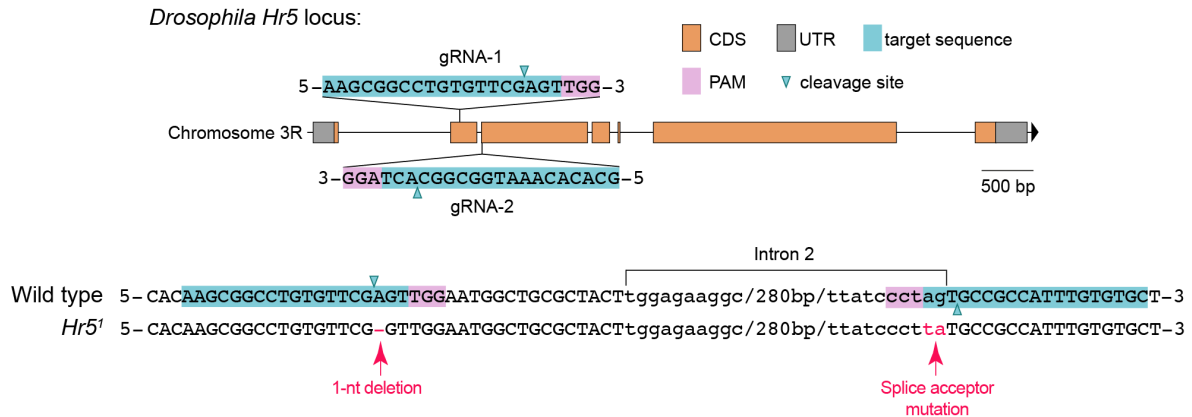

**B**

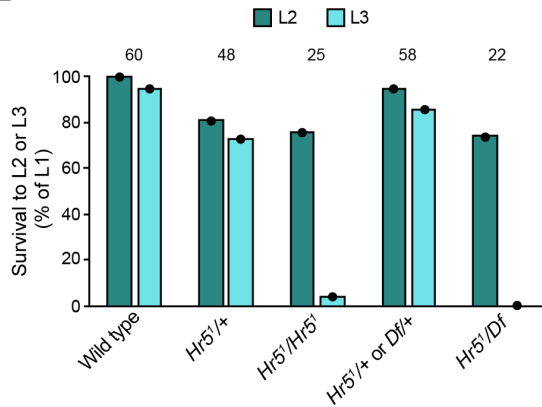

**C**

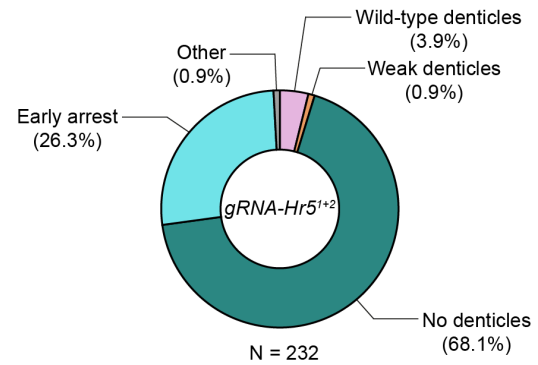

**Appendix Figure S6 - Generation of a *Drosophila Heatr5* mutant allele and analysis of the *Heatr5* zygotic and maternal phenotypes.**

**A** Position of target sites of *gRNA-Hr5*<sup>1+2</sup> transgene in *Heatr5* (*Hr5*) locus (top) and sequence of the *Hr5*<sup>1</sup> mutant allele compared to the wild-type precursor (bottom). PAM, protospacer adjacent motif. In the sequence alignment, the position of the PAM and target sequence is transposed to the opposite strand for simplicity.

**B** Lethal phase analysis of *Hr5*<sup>1</sup> zygotic mutants. L1, L2 and L3 are successive larval instar stages. As none of the genotypes exhibited significant lethality during embryogenesis, only the rate of survival of L1 larvae of the indicated genotypes to L2 or L3 stages was recorded (*Df*: chromosomal deficiency *Df*(3R)*BSC222*, which uncovers the *Hr5* locus). Data are expressed as a percentage of initial number of L1 larvae for each genotype, with the number of L1 larvae followed for each genotype shown above columns. *Hr5*<sup>1</sup>/*+* and *Hr5*<sup>1</sup> homozygous larvae were siblings from the same cross, as were '*Hr5*<sup>1</sup>/*+* or *Df*/*+*' and *Hr5*<sup>1</sup>/*Df* larvae.

**C** Quantification of cuticle defects of unhatched embryos from *nos-cas9 gRNA-Hr5*<sup>1+2</sup> females. Embryos in the 'No denticles' category had reached late stages of embryogenesis as judged by the development of obvious internal structures, such as abdominal segments and/or mouth parts; 'Early arrest' embryos had no obvious internal structures; 'Other' represents rare instances of axial patterning defects. Data are pooled from egg lays of females generated in three independent crosses, across which the results were very consistent. N is number of embryos analysed.

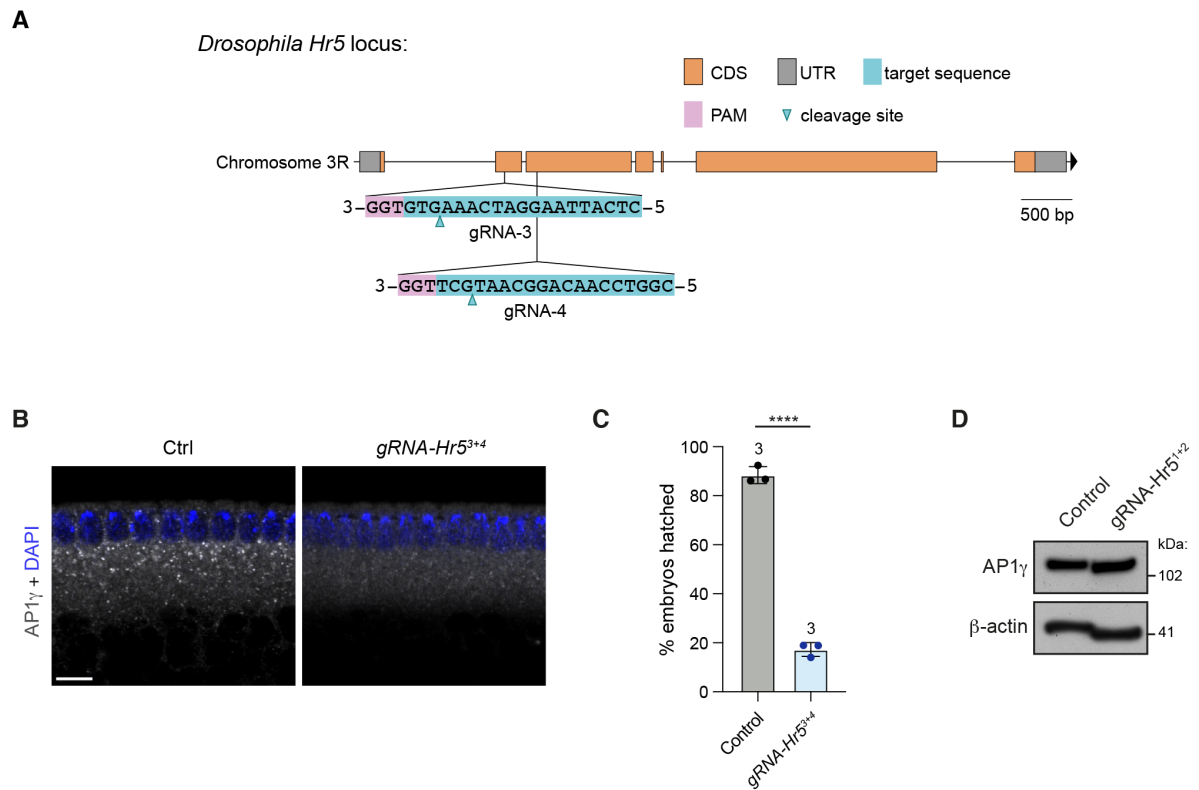

**Appendix Figure S7 - Supplementary results of CRISPR-based depletion of maternally provided Heatr5.**

A Position of target sites of *gRNA-Hr5<sup>3+4</sup>* transgene in the *Heatr5* (*Hr5*) locus.

B Representative confocal images of embryos from control (*nos-cas9*) and *nos-cas9 gRNA-Hr5<sup>3+4</sup>* females stained with AP1 $\gamma$  antibodies. Scale bar, 10  $\mu$ m.

C Hatching frequency of embryos laid by control (*nos-cas9*) and *nos-cas9 gRNA-Hr5<sup>3+4</sup>* females. Chart shows mean values per egg lay  $\pm$  SD; circles are values for individual egg lays (at least 150 embryos analysed per egg lay); number of egg lays is shown above columns. Statistical significance was evaluated with a t-test: \*\*\*\*P < 0.0001.

D Immunoblot images showing AP1 $\gamma$  protein level in cohorts of 0.5–3.5 h embryos laid by control (*nos-cas9*) and *nos-cas9 gRNA-Hr5<sup>1+2</sup>* females.  $\beta$ -actin was used as a loading control.

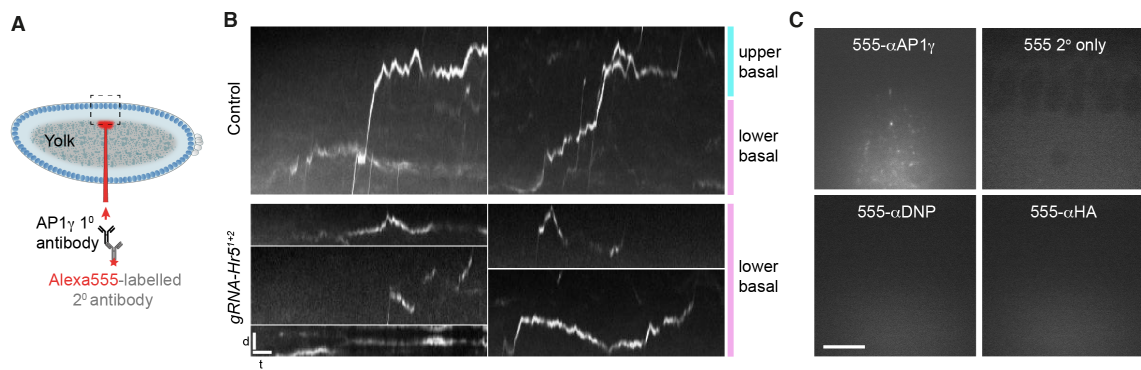

**Appendix Figure S8 - Supplementary information and results for AP1 $\gamma$  motility assays in *Drosophila* embryos.**

A Diagram of microinjection procedure. Dashed box shows typical field-of-view for imaging.

B Kymographs showing examples of AP1 $\gamma$  motility in embryos from control (*cas9*) and *nos-cas9 gRNA-Hr5<sup>1+2</sup>* females. Apical is to the top of each image. d = distance and t = time. Scale bars, 2  $\mu$ m and 20 s.

C Representative images of embryos injected ~ 60 s earlier with the indicated antibodies; note the absence of bright puncta for all antibodies except  $\alpha$ -AP1 $\gamma$ . Scale bar, 10  $\mu$ m.

# *Drosophila Golgin245* locus

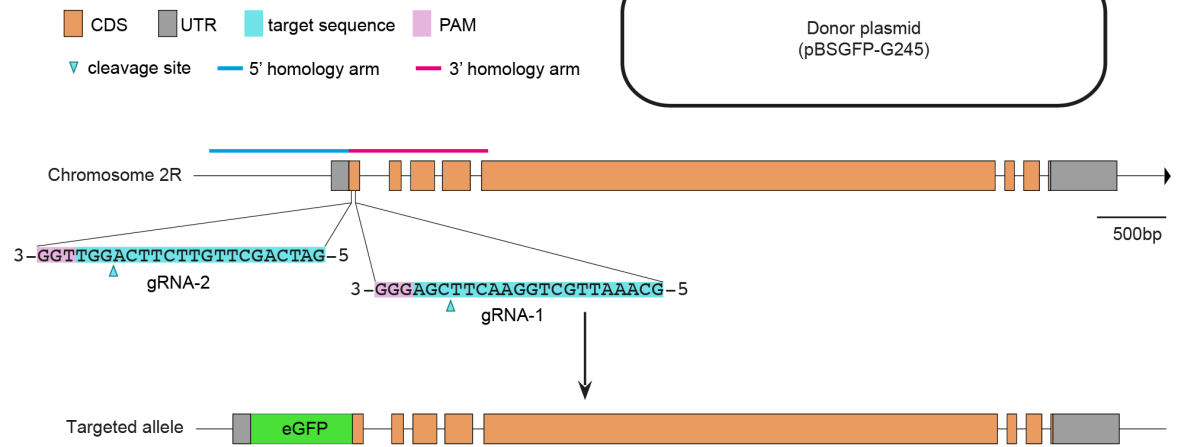

## **Appendix Figure S9 - Golgin-245 targeting strategy.**

Illustration of target sites and homology arms in the *Golgin245* locus, the GFP donor construct, and the *Golgin245* locus after knock-in of GFP.

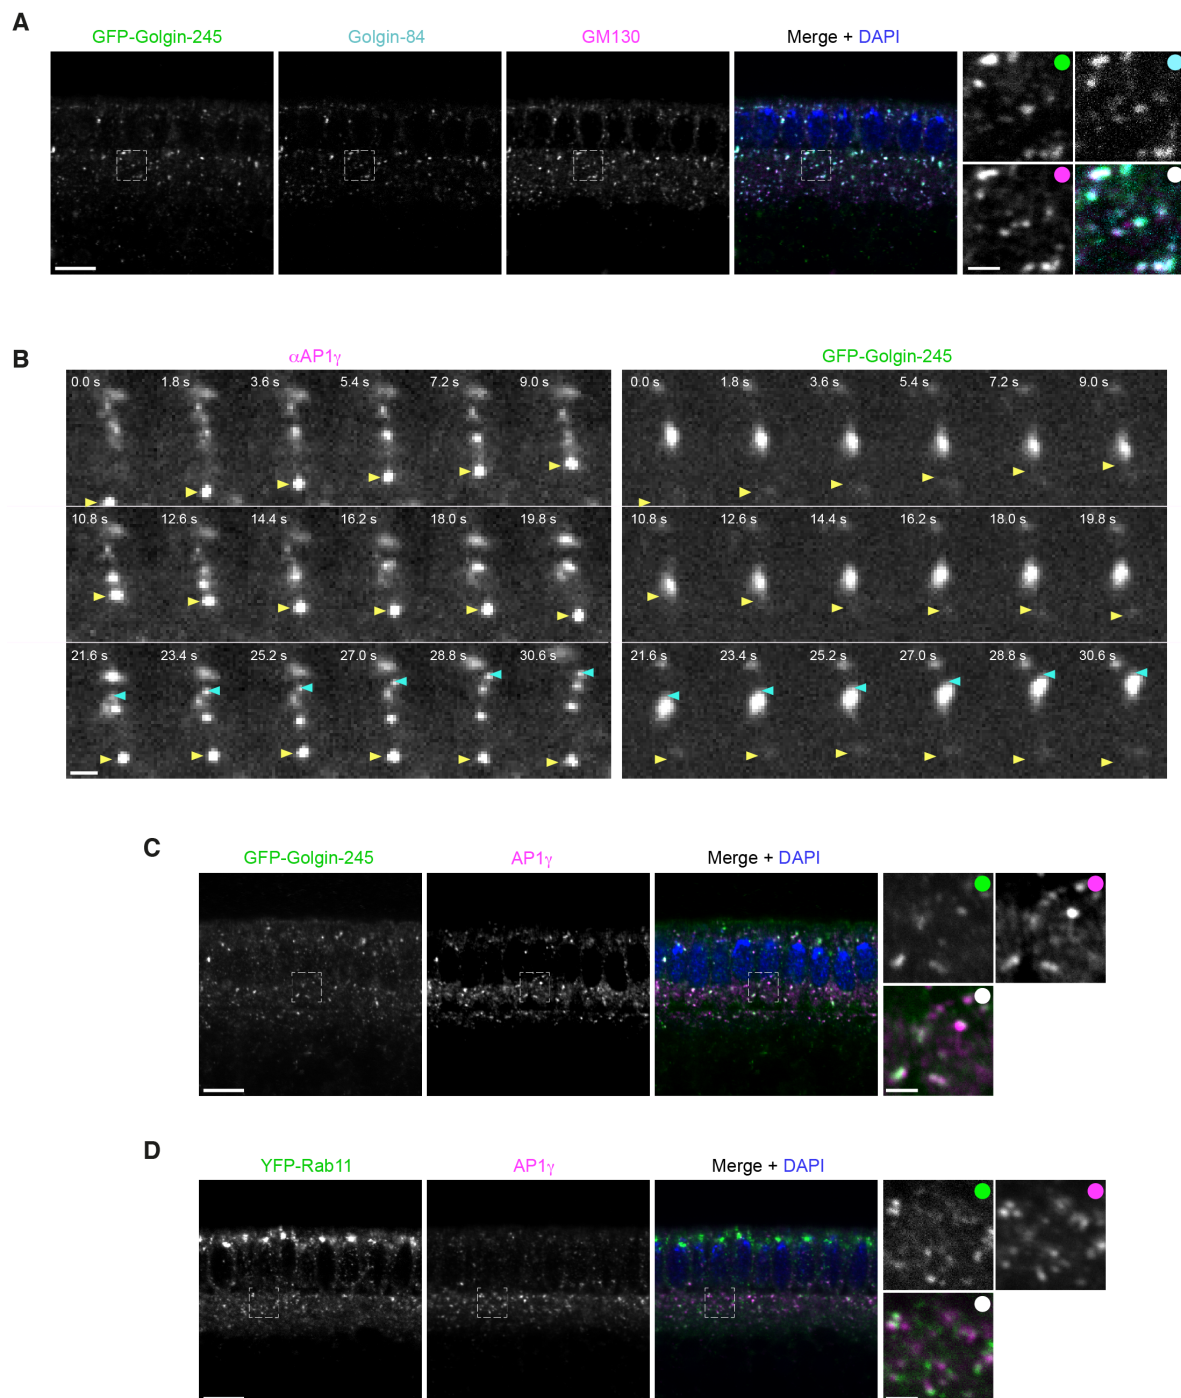

**Appendix Figure S10 - Supplementary information on protein localisation and trafficking in the *Drosophila* embryo.**

A Representative confocal images of blastoderm embryo stained for GFP-Golgin-245, Golgin-84 and GM130 showing the GFP fusion protein localises to the Golgi.

B Representative single-channel stills corresponding to the image series from Figure 7A (with yellow and cyan arrowheads in the equivalent positions).

C, D Representative confocal images of wild-type blastoderm embryos stained for GFP-Golgin-245 and AP1 $\gamma$  (C) or YFP-Rab11 and AP1 $\gamma$  (D). Dashed boxes show areas magnified in right-hand images. Scale bars: A, C and D, 10  $\mu$ m; B, and A, C, D insets, 2  $\mu$ m.

**Appendix Table S1. Non-dynein-dynactin components enriched on the dynein tail vs tag control in the absence of exogenous dynactin in either tail configuration**

| Protein   | Function                                         | Identifier <sup>(1)</sup> | Polypeptide length (aa) | Position(s) of predicted coiled coil(s) <sup>(2)</sup> |
|-----------|--------------------------------------------------|---------------------------|-------------------------|--------------------------------------------------------|
| Arglu1    | RNA binding/<br>transcriptional regulation       | Q3UL36                    | 271                     | -                                                      |
| Asap3     | Arf GTPase activating factor                     | Q5U464                    | 904                     | 142-167, 249-273                                       |
| Bicd2     | Dynein-dynactin cargo adaptor                    | Q921C5                    | 820                     | 20-270, 340-539, 662-804                               |
| Btf3l4    | Transcriptional regulation                       | Q9CQH7                    | 158                     | -                                                      |
| Hist2h2bb | Nucleosome component                             | Q64525                    | 126                     | -                                                      |
| Larp7     | RNA binding/ snRNA processing                    | Q05CL8                    | 570                     | -                                                      |
| Luc7l     | Putative RNA binding                             | Q9CYI4                    | 371                     | 87-177, 220-256                                        |
| Manf      | Neurotrophic factor                              | Q9CXI5                    | 179                     | -                                                      |
| Mapk8ip3  | Dynein-dynactin and kinesin cargo adaptor (Jip3) | Q9ESN9                    | 1337                    | 58-177, 437-555                                        |
| Nde1      | Regulator of dynein and Lis1                     | Q9CZA6                    | 344                     | 18-188                                                 |
| Pdxk      | Vitamers kinase                                  | Q8K183                    | 312                     | -                                                      |
| Pfn2      | Actin binding                                    | Q9JJV2                    | 140                     | -                                                      |
| Pkfl      | ATP-dependent 6-phosphofructokinase              | P12382                    | 780                     | -                                                      |
| Ppp3R1    | Calcineurin subunit                              | Q63810                    | 170                     | -                                                      |
| Prdx2     | Thiol-specific peroxidase                        | Q61171                    | 198                     | -                                                      |
| Psd3      | Arf6 GEF                                         | Q2PFD7                    | 1037                    | 911-941                                                |
| Pura      | Nucleic acid binding                             | P42669                    | 321                     | -                                                      |
| Purb      | Nucleic acid binding                             | O35295                    | 324                     | -                                                      |
| Rpl7a     | Large ribosomal subunit                          | P12970                    | 266                     | -                                                      |
| Rpl10a    | Large ribosomal subunit                          | P53026                    | 217                     | -                                                      |
| Rpl12     | Large ribosomal subunit                          | P35979                    | 165                     | -                                                      |
| Rpl17     | Large ribosomal subunit                          | Q9CPR4                    | 184                     | -                                                      |

|         |                                 |        |     |         |
|---------|---------------------------------|--------|-----|---------|
| Rpl18   | Large ribosomal subunit         | P35980 | 188 | -       |
| Rpl31   | Large ribosomal subunit         | P62900 | 125 | -       |
| Rplp1   | Translational elongation        | P47955 | 114 | -       |
| Rps10   | Small ribosomal subunit         | P63325 | 165 | -       |
| Rps13   | Small ribosomal subunit         | P62301 | 151 | -       |
| Rps18   | Small ribosomal subunit         | P62270 | 152 | -       |
| Rps23   | Small ribosomal subunit         | P62267 | 143 | -       |
| Rps28   | Small ribosomal subunit         | P62858 | 69  | -       |
| Rsrc2   | Cell proliferation regulator    | A2RTL5 | 376 | 171-214 |
| Slc35g2 | Solute carrier                  | D3YVE8 | 412 | -       |
| Snrnp70 | Spliceosomal U1 snRNP component | Q62376 | 448 | -       |
| Snrpd1  | Spliceosomal snRNP component    | P62315 | 119 | -       |
| Tma7    | Unknown                         | Q8K003 | 64  | 21-50   |

- 
- (1) UniProtKB accession number (canonical mouse sequence)  
(2) Information compiled at UniProtKB (<https://www.uniprot.org>)

**Appendix Table S2. Non-dynein-dynactin components enriched on the dynein tail vs tag control in the presence of exogenous dynactin in at least one tail configuration**

| Protein | Molecular function                        | Identifier <sup>(1)</sup> | Polypeptide length (aa) | Position(s) of predicted coiled coil(s) <sup>(2)</sup> |
|---------|-------------------------------------------|---------------------------|-------------------------|--------------------------------------------------------|
| Acp1    | Phosphotyrosine protein phosphatase       | Q9D358                    | 158                     | -                                                      |
| Calm1   | Calcium-based enzyme regulation           | P0DP26                    | 149                     | -                                                      |
| Ctnbp2  | Regulates neuronal cortactin distribution | B9EJA2                    | 1648                    | 119-274                                                |
| Gfap    | Intermediate filament protein             | P03995                    | 430                     | 70-214, 228-374                                        |
| Heatr5B | AP-1 complex associated                   | Q8C547                    | 2070                    | -                                                      |
| Hnrnpu  | DNA and RNA binding protein               | Q8VEK3                    | 800                     | 626-653                                                |
| Ppm1e   | Protein phosphates                        | Q80TL0                    | 749                     | -                                                      |
| Rpl14   | Large ribosomal subunit protein           | Q9CR57                    | 217                     | -                                                      |
| Rpl19   | Large ribosomal subunit protein           | P84099                    | 196                     | -                                                      |
| Rpl6    | Large ribosomal subunit protein           | P47911                    | 296                     | -                                                      |
| Rps7    | Small ribosomal subunit protein           | P62082                    | 194                     | -                                                      |
| Rps8    | Small ribosomal subunit protein           | P62242                    | 208                     | -                                                      |
| Rps16   | Small ribosomal subunit protein           | P14131                    | 146                     | -                                                      |
| Smarca2 | Transcriptional regulation                | Q6DIC0                    | 1577                    | -                                                      |
| Strip1  | Cytoskeletal regulator                    | Q8C079                    | 837                     | -                                                      |
| Tial1   | RNA binding                               | P70318                    | 392                     | -                                                      |
| Wdr91   | Endosomal trafficking                     | Q7TMQ7                    | 748                     | -                                                      |

(1) UniProtKB accession number (canonical mouse sequence)

(2) Information compiled at UniProtKB (<https://www.uniprot.org>)

**Appendix Table S3. Information on *HEATR5B* mutant U2OS cell lines**

| Clone name | Types of mutation detected (nt) <sup>(1)</sup> | Protein expression <sup>(2)</sup> |
|------------|------------------------------------------------|-----------------------------------|
| KO 1-17    | +1                                             | Abolished                         |
| KO 1-2     | +1, -1                                         | Abolished                         |
| KO 2-2     | -20                                            | Abolished                         |

(1) Predominant alleles identified by TIDE; + and – refer, respectively, to insertion and deletions. In cases in which only one allele is detected, mutations may be homozygous or *trans*-heterozygous over an allele that deletes the sequenced region.

(2) Assessed by immunoblotting for full-length protein

**Appendix Table S4. Oligonucleotides used to create gRNA plasmids for CRISPR in *Drosophila***

| Gene             | Constructed plasmid <sup>(1)</sup>  | gRNA cloning oligos <sup>(2)</sup>                                                                                                                                                           |
|------------------|-------------------------------------|----------------------------------------------------------------------------------------------------------------------------------------------------------------------------------------------|
| <i>Heatr5</i>    | <i>pCDF4-gRNA-Hr5<sup>1+2</sup></i> | f : TATATAGGAAAGATATCCGGGTGAACTTCGA <u>AAGCGGCCTGT</u><br>GTTTCGAGTGT <sup>TTTT</sup> AGAGCTAGAAATAGCAAG<br>r : ATTTTAACTTGCTATTTCTAGCTCTAAAACAGTGCCGCCAT<br>TTGTGTGCCGACGTTAAATTGAAAATAGGTC |
| <i>Heatr5</i>    | <i>pCDF4-gRNA-Hr5<sup>3+4</sup></i> | f : TATATAGGAAAGATATCCGGGTGAACTTCGCTCATTAAAGGA<br>TCAAAGTGGT <sup>TTTT</sup> AGAGCTAGAAATAGCAAG<br>r : ATTTTAACTTGCTATTTCTAGCTCTAAAACAGCATTGCCTG<br>TTGGACCGCGACGTTAAATTGAAAATAGGTC          |
| <i>Golgin245</i> | <i>pCFD3-gRNA-G245<sup>1</sup></i>  | f : GTCGCAAATTGCTGGA <sup>ACT</sup> TCGA<br>r : AAACTCGAAGTTCCAGCAATTG                                                                                                                       |
|                  | <i>pCFD3-gRNA-G245<sup>2</sup></i>  | f : GTCGATCAGCTTGTCTTCAGGT<br>r : AAACACCTGAAGAACAAGCTGAT                                                                                                                                    |

(1) See Port et al. (2014) for details of vectors.

(2) f, forward; r, reverse. Sequences corresponding to target sequence are underlined. For pCFD4, PCR with the primer pairs using the parental pCFD4 plasmid as a template yields a double gRNA containing product that can be used to produce the desired pCFD4 plasmid. For pCFD3, the primer pairs are annealed before cloning into the Bbs1-cut vector.
